# Supplementary material for: TiCl4-mediated deoxygenative reduction of aromatic ketones to alkylarenes with ammonia borane
Source: Royal Society of Chemistry journal article supplement (doi:10.1039/d3ob01977b), 2024-01-01
Supplement: d3ob01977b1.pdf [file d3ob01977b1.pdf]

# **TiCl<sub>4</sub>-Mediated Deoxygenative Reduction of Aromatic Ketones to Alkylarenes with Ammonia Borane**

Yongjun Zang,<sup>a</sup> Yunfeng Ma,<sup>b</sup> Qilin Xu,<sup>a</sup> Guosi Li,<sup>a</sup> Naidong Chen<sup>a</sup>, Xing Li,<sup>\*c</sup> and Fucheng Zhu<sup>\*a</sup>

<sup>a</sup>Anhui Province Key Laboratory for Quality Evaluation and Improvement of Traditional Chinese Medicine, Department of Biological and Pharmaceutical Engineering, West Anhui University, Lu'an, 237012, Anhui, P.R. China. E-mail address: fucheng323@163.com.

<sup>b</sup>Anhui Anlito Biological Technology Co., LTD, Anhui Huoshan Economic and Technological Development Zone P.R. China. 237200.

<sup>c</sup>College of Pharmacy and Chemistry & Chemical Engineering, Taizhou University, Taizhou, Jiangsu 225300, P.R. China. E-mail: lixingluck@126.com

## **Table of contents**

|                                                                                        |           |
|----------------------------------------------------------------------------------------|-----------|
| <b>1. General Information.....</b>                                                     | <b>2</b>  |
| <b>2. The typical reaction procedures .....</b>                                        | <b>2</b>  |
| <b>3. Gram scale synthesis.....</b>                                                    | <b>3</b>  |
| <b>4. Characterization data for the compounds.....</b>                                 | <b>3</b>  |
| <b>5. Copies of <sup>1</sup>H and <sup>13</sup>C NMR spectra of all products .....</b> | <b>14</b> |

## 1. General Information

All the reagents and solvents were obtained via commercial sources and used without further purification. Ammonia Borane (purity, 98.6%) was purchased from Shanghai Haohong Scientific Co.,Ltd. Analytical thin-layer chromatography (TLC) was performed on silica gel 60 F254 plates (Qingdao Ocean Chemical Company, China). Column chromatography was carried out on silica gel (200-300 mesh, Qingdao Ocean Chemical Company, China).  $^1\text{H-NMR}$  and  $^{13}\text{C-NMR}$  spectra were recorded on Bruker 600 MHz and 151 MHz respectively, using  $\text{CDCl}_3$  as the solvent with tetramethylsilane (TMS) as an internal standard at room temperature. Data are reported in chemical shifts, integration, multiplicity (s = singlet, d = doublet, t = triplet, m = multiplets, dd = doublet of doublet), and coupling constants ( $J$ ) in Hz.

## 2. The typical reaction procedures

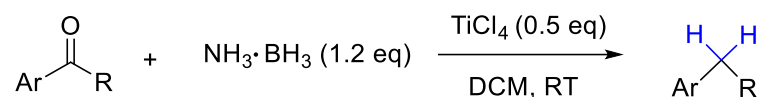

A 10 mL dried round-bottom flask was charged with ketones (1 mmol, 1 equiv), DCM (2 mL) was added, and the solution was stirred at room temperature. Subsequently, titanium tetrachloride ( $\text{TiCl}_4$ ) (0.5 mmol, 0.5 eq) was added dropwise to the solution slowly. Then solid ammonia borane ( $\text{NH}_3\text{BH}_3$ ) (1.2 mmol, 1.2 eq) was added to the reaction mixture. Upon complete addition, the reaction was stirred at room temperature for 1 h, and monitored by TLC. On completion of the reaction, the mixture was quenched with 1N HCl (2.0 mL). Then the mixture was extracted with  $\text{CH}_2\text{Cl}_2$  ( $3 \times 2$  mL). The combined organic phases were dried over  $\text{Na}_2\text{SO}_4$ , then filtered and evaporated under reduced pressure. The crude product was purified by a silica gel-packed flash chromatography column with pure hexane as the eluent to give the pure desired products.

### 3. Gram scale synthesis

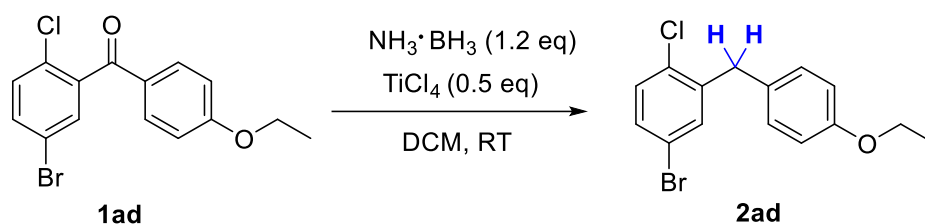

A 100 mL dried round-bottom flask was charged with **1ad** (1.94g, 6.0 mmol), DCM (10 mL) was added, and the solution was stirred in an ice-water bath. Subsequently, titanium tetrachloride ( $\text{TiCl}_4$ ) (330  $\mu\text{L}$ , 3.0 mmol) was added dropwise to the solution slowly. Then solid ammonia borane ( $\text{NH}_3\text{BH}_3$ ) (223 mg, 7.2 mmol) was added to the reaction mixture. Upon complete addition, the reaction was stirred at room temperature for 1 h, and monitored by TLC. On completion of the reaction, the mixture was quenched with 1N HCl (10 mL). Then the mixture was extracted with  $\text{CH}_2\text{Cl}_2$  (3  $\times$  6 mL). The combined organic phases were dried over  $\text{Na}_2\text{SO}_4$ , then filtered and evaporated under reduced pressure. The crude product was purified by a silica gel-packed flash chromatography column with pure hexane as the eluent to give the pure desired **2ad** (1.91g, 98% yield).

### 4. Characterization data for the compounds

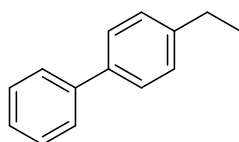

**4-ethyl-1,1'-biphenyl (2a)**<sup>1</sup>: White solid (178 mg, 99%).  $^1\text{H}$  NMR (600 MHz,  $\text{CDCl}_3$ )  $\delta$  7.58 (d,  $J = 7.6$  Hz, 2H), 7.51 (d,  $J = 7.8$  Hz, 2H), 7.42 (t,  $J = 7.5$  Hz, 2H), 7.31 (t,  $J = 7.3$  Hz, 1H), 7.27 (d,  $J = 7.8$  Hz, 2H), 2.69 (q,  $J = 7.6$  Hz, 2H), 1.27 (t,  $J = 7.6$  Hz, 3H).  $^{13}\text{C}$  NMR (151 MHz,  $\text{CDCl}_3$ )  $\delta$  143.42, 141.23, 138.65, 128.74, 128.32, 127.12, 127.05, 127.00, 28.55, 15.62.

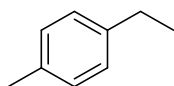

**1-ethyl-4-methylbenzene (2b)<sup>2</sup>**: colorless oil (108 mg, 90%). <sup>1</sup>H NMR (600 MHz, CDCl<sub>3</sub>) δ 7.09 (s, 4H), 2.61 (q, *J* = 7.6 Hz, 2H), 2.32 (s, 3H), 1.22 (t, *J* = 7.6 Hz, 3H). <sup>13</sup>C NMR (151 MHz, CDCl<sub>3</sub>) δ 157.67, 136.65, 128.74, 113.77, 55.28, 28.01, 15.80.

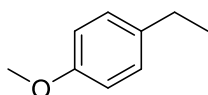

**1-ethyl-4-methoxybenzene (2c)<sup>2</sup>**: colorless oil (121 mg, 88%). <sup>1</sup>H NMR (600 MHz, CDCl<sub>3</sub>) δ 7.12 (d, *J* = 8.5 Hz, 1H), 6.83 (d, *J* = 8.6 Hz, 1H), 3.79 (s, 3H), 2.59 (q, *J* = 7.6 Hz, 2H), 1.21 (t, *J* = 7.6 Hz, 3H). <sup>13</sup>C NMR (151 MHz, CDCl<sub>3</sub>) δ 128.58, 113.78, 54.52, 27.83, 16.09.

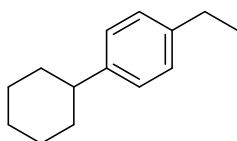

**1-cyclohexyl-4-ethylbenzene (2d)<sup>1</sup>**: colorless oil (160 mg, 86%). <sup>1</sup>H NMR (600 MHz, CDCl<sub>3</sub>) δ 7.12 (s, 4H), 2.62 (q, *J* = 7.6 Hz, 2H), 2.51 – 2.42 (m, 1H), 1.92 – 1.79 (m, 4H), 1.77 – 1.71 (m, 1H), 1.45 – 1.33 (m, 4H), 1.23 (t, *J* = 7.6 Hz, 4H). <sup>13</sup>C NMR (151 MHz, CDCl<sub>3</sub>) δ 145.39, 141.57, 127.75, 126.74, 44.20, 34.59, 28.43, 27.00, 26.24, 15.58.

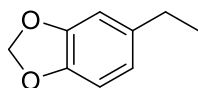

**5-ethylbenzo[d][1,3]dioxole (2e)<sup>3</sup>**: colorless oil (102 mg, 68%). <sup>1</sup>H NMR (600 MHz, CDCl<sub>3</sub>) δ 6.72 (d, *J* = 7.9 Hz, 1H), 6.69 (s, 1H), 6.64 (d, *J* = 8.5 Hz, 1H), 5.90 (s, 2H), 2.56 (q, *J* = 7.6 Hz, 2H), 1.19 (t, *J* = 7.6 Hz, 3H). <sup>13</sup>C NMR (151 MHz, CDCl<sub>3</sub>) δ 147.52, 145.41, 138.24, 120.42, 108.43, 108.11, 100.70, 28.35, 15.81.

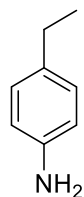

**4-ethylaniline (2f)**<sup>4</sup>: yellow oil (94 mg, 78%). <sup>1</sup>H NMR (600 MHz, CDCl<sub>3</sub>) δ 6.98 (d, *J* = 8.2 Hz, 2H), 6.61 (d, *J* = 8.3 Hz, 2H), 3.39 (s, 2H), 2.53 (q, *J* = 7.6 Hz, 2H), 1.18 (t, *J* = 7.6 Hz, 3H). <sup>13</sup>C NMR (151 MHz, CDCl<sub>3</sub>) δ 144.11, 134.50, 128.53 (d, *J* = 31.7 Hz), 115.34, 28.03, 16.00.

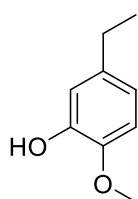

**5-ethyl-2-methoxyphenol (2g)**<sup>5</sup>: colorless oil (115 mg, 76%). <sup>1</sup>H NMR (600 MHz, CDCl<sub>3</sub>) δ 6.79 (s, 1H), 6.77 (d, *J* = 8.2 Hz, 1H), 6.67 (d, *J* = 8.1 Hz, 1H), 5.59 (s, 1H), 3.85 (s, 3H), 2.55 (q, *J* = 7.6 Hz, 2H), 1.20 (t, *J* = 7.6 Hz, 3H). <sup>13</sup>C NMR (151 MHz, CDCl<sub>3</sub>) δ 145.46, 144.60, 137.76, 119.05, 114.19, 110.66, 56.05, 28.26, 15.77.

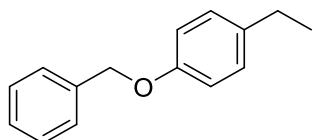

**1-(benzyloxy)-4-ethylbenzene (2h)**<sup>6</sup>: White solid (150 mg, 71%). <sup>1</sup>H NMR (600 MHz, CDCl<sub>3</sub>) δ 7.43 (d, *J* = 7.5 Hz, 2H), 7.37 (t, *J* = 7.6 Hz, 2H), 7.31 (t, *J* = 7.3 Hz, 1H), 7.11 (d, *J* = 8.5 Hz, 2H), 6.90 (d, *J* = 8.6 Hz, 2H), 5.04 (s, 2H), 2.59 (q, *J* = 7.6 Hz, 2H), 1.21 (t, *J* = 7.6 Hz, 3H). <sup>13</sup>C NMR (151 MHz, CDCl<sub>3</sub>) δ 156.89, 137.31, 136.72, 128.75, 128.57, 127.89, 127.49, 114.74, 70.10, 28.01, 15.87.

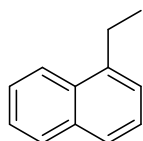

**1-ethylnaphthalene (2i)**<sup>1</sup>: White solid (140 mg, 90%). <sup>1</sup>H NMR (600 MHz, CDCl<sub>3</sub>) δ

8.05 (d,  $J = 8.3$  Hz, 1H), 7.85 (d,  $J = 7.9$  Hz, 1H), 7.70 (d,  $J = 8.2$  Hz, 1H), 7.50 (t,  $J = 7.6$  Hz, 1H), 7.46 (t,  $J = 6.9$  Hz, 1H), 7.42 – 7.38 (m, 1H), 7.33 (d,  $J = 7.0$  Hz, 1H), 3.11 (q,  $J = 7.5$  Hz, 2H), 1.38 (t,  $J = 7.6$  Hz, 3H).  $^{13}\text{C}$  NMR (151 MHz,  $\text{CDCl}_3$ )  $\delta$  140.30, 133.84, 131.80, 128.76, 126.40, 125.69, 125.41, 124.87, 123.76, 25.91, 15.06.

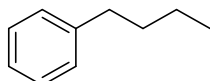

**Butylbenzene (2j)**<sup>2</sup>: colorless oil (114 mg, 85%).  $^1\text{H}$  NMR (600 MHz,  $\text{CDCl}_3$ )  $\delta$  7.30 – 7.25 (m, 2H), 7.21 – 7.13 (m, 3H), 2.66 – 2.57 (m, 2H), 1.64 – 1.57 (m, 2H), 1.40 – 1.32 (m, 2H), 0.93 (t,  $J = 7.4$  Hz, 3H).  $^{13}\text{C}$  NMR (151 MHz,  $\text{CDCl}_3$ )  $\delta$  146.52, 139.38, 128.56, 128.43, 127.53, 100.42, 34.17, 14.56.

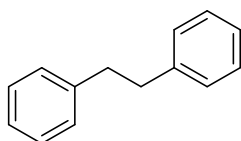

**1,2-diphenylethane (2k)**<sup>7</sup>: White solid (142 mg, 78%).  $^1\text{H}$  NMR (600 MHz,  $\text{CDCl}_3$ )  $\delta$  7.28 (t,  $J = 7.5$  Hz, 4H), 7.19 (t,  $J = 7.8$  Hz, 6H), 2.92 (s, 4H).  $^{13}\text{C}$  NMR (151 MHz,  $\text{CDCl}_3$ )  $\delta$  141.81, 128.47, 128.35, 125.93, 37.96.

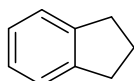

**2,3-dihydro-1H-indene (2l)**<sup>2</sup>: colorless oil (73 mg, 62%).  $^1\text{H}$  NMR (600 MHz,  $\text{CDCl}_3$ )  $\delta$  7.23 (dd,  $J = 5.0, 3.5$  Hz, 2H), 7.13 (dd,  $J = 5.4, 3.2$  Hz, 2H), 2.91 (t,  $J = 7.4$  Hz, 4H), 2.13 – 1.99 (m, 2H).  $^{13}\text{C}$  NMR (151 MHz,  $\text{CDCl}_3$ )  $\delta$  143.96, 125.97, 124.37, 32.87, 25.34.

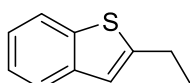

**2-ethylbenzo[b]thiophene (2m)**<sup>8</sup>: colorless oil (130 mg, 80%). <sup>1</sup>H NMR (600 MHz, CDCl<sub>3</sub>) δ 7.76 (d, *J* = 8.0 Hz, 1H), 7.66 (d, *J* = 7.9 Hz, 1H), 7.29 (t, *J* = 8.0 Hz, 1H), 7.23 (d, *J* = 7.0 Hz, 1H), 7.00 (s, 1H), 2.94 (q, *J* = 7.5 Hz, 2H), 1.38 (t, *J* = 7.5 Hz, 3H). <sup>13</sup>C NMR (151 MHz, CDCl<sub>3</sub>) δ 148.33, 140.26, 139.21, 124.04, 123.36, 122.69, 122.13, 119.66.

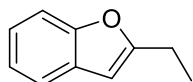

**2-ethylbenzofuran (2n)**<sup>9</sup>: colorless oil (108 mg, 76%). <sup>1</sup>H NMR (600 MHz, CDCl<sub>3</sub>) δ 7.47 (d, *J* = 8.3 Hz, 1H), 7.40 (d, *J* = 8.0 Hz, 1H), 7.22 – 7.14 (m, 2H), 2.80 (q, *J* = 7.5 Hz, 2H), 1.33 (t, *J* = 7.5 Hz, 3H). <sup>13</sup>C NMR (151 MHz, CDCl<sub>3</sub>) δ 161.02, 154.64, 129.01, 123.06, 122.36, 120.19, 110.68, 100.99, 21.80, 11.90.

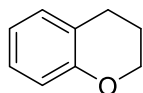

**Chromane (2o)**<sup>2</sup>: Colorless oil (100 mg, 75%). <sup>1</sup>H NMR (600 MHz, CDCl<sub>3</sub>) δ 7.07 (t, *J* = 7.7 Hz, 1H), 7.03 (d, *J* = 7.4 Hz, 1H), 6.82 (t, *J* = 7.4 Hz, 1H), 6.78 (d, *J* = 8.2 Hz, 1H), 4.18 (t, *J* = 6.0 Hz, 2H), 2.78 (t, *J* = 6.5 Hz, 2H), 2.05 – 1.95 (m, 2H). <sup>13</sup>C NMR (151 MHz, CDCl<sub>3</sub>) δ 154.92, 129.83, 127.21, 122.24, 120.11, 116.71, 66.44, 24.89, 22.40.

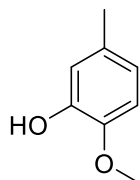

**2-methoxy-5-methylphenol (2p)**<sup>10</sup>: White solid (89 mg, 65%). <sup>1</sup>H NMR (600 MHz, CDCl<sub>3</sub>) δ 6.77 – 6.72 (m, 2H), 6.64 (d, *J* = 8.1 Hz, 1H), 5.55 (s, 1H), 3.85 (s, 3H), 2.26 (s, 3H). <sup>13</sup>C NMR (151 MHz, CDCl<sub>3</sub>) δ 145.37, 144.45, 131.16, 120.26, 115.36, 110.64, 56.07, 20.78.

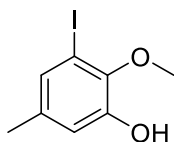

**3-iodo-2-methoxy-5-methylphenol (2q)**: White solid (158 mg, 60%).  $^1\text{H}$  NMR (600 MHz,  $\text{CDCl}_3$ )  $\delta$  7.11 (s, 1H), 6.64 (s, 1H), 5.91 (s, 1H), 3.86 (s, 3H), 2.25 (s, 3H).  $^{13}\text{C}$  NMR (151 MHz,  $\text{CDCl}_3$ )  $\delta$  145.77, 143.47, 131.39, 130.46, 111.88, 81.07, 56.18, 20.62. HRMS (ESI) calcd for  $\text{C}_8\text{H}_9\text{IO}_2$ :  $[\text{M} - \text{H}]^- = 262.9574$ , found  $m/z = 262.9572$ .

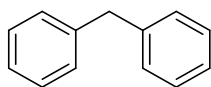

**Diphenylmethane (2r)**<sup>1</sup>: White solid (137 mg, 83%).  $^1\text{H}$  NMR (600 MHz,  $\text{CDCl}_3$ )  $\delta$  7.28 (t,  $J = 7.7$  Hz, 4H), 7.19 (t,  $J = 7.1$  Hz, 6H), 3.98 (s, 1H).  $^{13}\text{C}$  NMR (151 MHz,  $\text{CDCl}_3$ )  $\delta$  141.15, 128.97, 128.49, 126.10, 41.98.

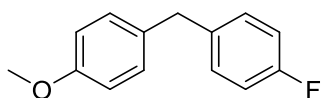

**1-fluoro-4-(4-methoxybenzyl)benzene (2s)**<sup>11</sup>: Colorless oil (210 mg, 98%).  $^1\text{H}$  NMR (600 MHz,  $\text{CDCl}_3$ )  $\delta$  7.11 (dd,  $J = 8.6, 5.5$  Hz, 2H), 7.07 (d,  $J = 8.7$  Hz, 2H), 6.95 (t,  $J = 8.7$  Hz, 2H), 6.83 (d,  $J = 8.6$  Hz, 2H), 3.88 (s, 2H), 3.77 (s, 3H).  $^{13}\text{C}$  NMR (151 MHz,  $\text{CDCl}_3$ )  $\delta$  161.39 (d,  $J = 243.4$  Hz), 158.08, 137.26 (d,  $J = 3.2$  Hz), 133.09, 130.1, 130.14, 129.80, 115.18 (d,  $J = 20.9$  Hz), 113.97, 55.27, 40.20.

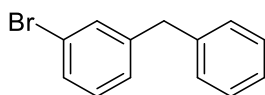

**1-benzyl-3-bromobenzene (2t)**<sup>12</sup>: Colorless oil (242 mg, 98%).  $^1\text{H}$  NMR (600 MHz,  $\text{CDCl}_3$ )  $\delta$  7.38 – 7.26 (m, 4H), 7.21 (t,  $J = 7.4$  Hz, 1H), 7.19 – 7.15 (m, 2H), 7.13 (d,  $J = 7.5$  Hz, 1H), 7.10 (d,  $J = 7.6$  Hz, 1H), 3.94 (s, 2H).  $^{13}\text{C}$  NMR (151 MHz,  $\text{CDCl}_3$ )  $\delta$  143.48, 140.19, 131.94, 130.03, 129.26, 128.95, 128.64, 127.60, 126.41, 122.58, 41.56.



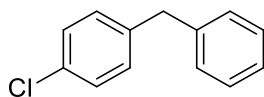

**1-benzyl-4-chlorobenzene (2u)**<sup>7</sup>: Colorless oil (187 mg, 93%). <sup>1</sup>H NMR (600 MHz, CDCl<sub>3</sub>) δ 7.28 (t, *J* = 7.5 Hz, 2H), 7.26 – 7.22 (m, 2H), 7.20 (t, *J* = 7.4 Hz, 1H), 7.15 (d, *J* = 7.2 Hz, 2H), 7.10 (d, *J* = 8.3 Hz, 2H), 3.94 (s, 2H). <sup>13</sup>C NMR (151 MHz, CDCl<sub>3</sub>) δ 140.58, 139.61, 131.92, 130.28, 128.89, 128.60, 126.32, 41.27.

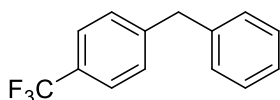

**1-benzyl-4-(trifluoromethyl)benzene (2v)**<sup>13</sup>: Colorless oil (233 mg, 100%). <sup>1</sup>H NMR (600 MHz, CDCl<sub>3</sub>) δ 7.53 (d, *J* = 8.0 Hz, 2H), 7.30 (t, *J* = 7.8 Hz, 4H), 7.22 (t, *J* = 7.3 Hz, 1H), 7.17 (d, *J* = 7.5 Hz, 2H), 4.03 (s, 2H). <sup>13</sup>C NMR (151 MHz, CDCl<sub>3</sub>) δ 145.22, 139.99, 129.20, 128.95, 128.68, 126.48, 125.41 (dd, *J* = 7.3, 3.4 Hz), 41.72.

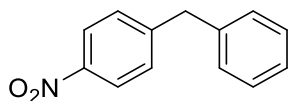

**1-benzyl-4-nitrobenzene (2w)**<sup>14</sup>: Colorless oil (188 mg, 89%). <sup>1</sup>H NMR (600 MHz, CDCl<sub>3</sub>) δ 8.13 (d, *J* = 8.7 Hz, 2H), 7.32 (dd, *J* = 12.7, 8.2 Hz, 4H), 7.27 – 7.23 (m, 1H), 7.17 (d, *J* = 7.2 Hz, 2H), 4.07 (s, 2H). <sup>13</sup>C NMR (151 MHz, CDCl<sub>3</sub>) δ 148.89, 146.54, 139.21, 129.67, 128.98, 128.84, 126.78, 123.77, 41.74.

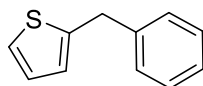

**2-benzylthiophene (2x)**<sup>11</sup>: Colorless oil (135 mg, 78%). <sup>1</sup>H NMR (600 MHz, CDCl<sub>3</sub>) δ 7.30 (t, *J* = 7.5 Hz, 2H), 7.26 – 7.19 (m, 3H), 7.13 (d, *J* = 5.1 Hz, 1H), 6.94 – 6.89 (m, 1H), 6.79 (d, *J* = 3.3 Hz, 1H), 4.15 (s, 2H). <sup>13</sup>C NMR (151 MHz, CDCl<sub>3</sub>) δ 144.07, 140.44, 128.62, 128.57, 126.84, 126.51, 125.18, 123.96.

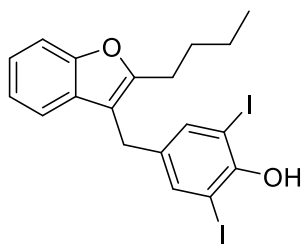

**4-((2-butylbenzofuran-3-yl)methyl)-2,6-diiodophenol (2y):** White solid (507 mg, 95%).  $^1\text{H}$  NMR (600 MHz,  $\text{CDCl}_3$ )  $\delta$  7.50 (s, 2H), 7.41 (d,  $J = 8.1$  Hz, 1H), 7.24 – 7.18 (m, 2H), 7.13 (t,  $J = 7.5$  Hz, 1H), 5.61 (s, 1H), 3.84 (s, 2H), 2.74 (t,  $J = 7.5$  Hz, 2H), 1.76 – 1.65 (m, 2H), 1.43 – 1.32 (m, 2H), 0.94 (t,  $J = 7.4$  Hz, 3H).  $^{13}\text{C}$  NMR (151 MHz,  $\text{CDCl}_3$ )  $\delta$  155.84, 154.06, 151.99, 138.84, 135.98, 129.08, 123.40, 122.33, 118.98, 111.83, 110.81, 82.25, 30.46, 27.72, 26.20, 22.46, 13.88. HRMS (ESI) calcd for  $\text{C}_{19}\text{H}_{18}\text{I}_2\text{O}_2$ :  $[\text{M} - \text{H}]^- = 530.9323$ , found  $m/z = 530.9314$ .

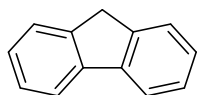

**9H-fluorene (2z)**<sup>11</sup>: White solid (172 mg, 100%).  $^1\text{H}$  NMR (600 MHz,  $\text{CDCl}_3$ )  $\delta$  7.22 – 7.14 (m, 4H), 7.09 – 6.99 (m, 4H), 4.04 (s, 2H).  $^{13}\text{C}$  NMR (151 MHz,  $\text{CDCl}_3$ )  $\delta$  151.99, 128.93, 127.65, 122.97, 120.60, 116.48, 27.90.

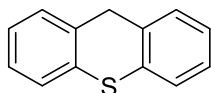

**9H-thioxanthene (2aa)**<sup>11</sup>: White solid (162 mg, 82%).  $^1\text{H}$  NMR (600 MHz,  $\text{CDCl}_3$ )  $\delta$  7.43 (d,  $J = 7.1$  Hz, 2H), 7.30 (d,  $J = 7.0$  Hz, 2H), 7.22 – 7.14 (m, 4H), 3.84 (s, 1H).  $^{13}\text{C}$  NMR (151 MHz,  $\text{CDCl}_3$ )  $\delta$  136.23, 133.88, 127.96, 126.89, 126.63, 126.55, 39.23.

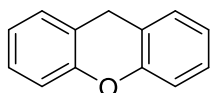

**9H-xanthene (2ab)**<sup>11</sup>: Colorless oil (186 mg, 100%).  $^1\text{H}$  NMR (600 MHz,  $\text{CDCl}_3$ )  $\delta$  7.22 – 7.13 (m, 4H), 7.08 – 6.96 (m, 4H), 4.04 (s, 2H).  $^{13}\text{C}$  NMR (151 MHz,  $\text{CDCl}_3$ )  $\delta$  151.99, 128.93, 127.66, 122.97, 120.60, 116.49, 27.90.

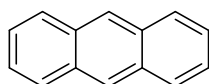

**Anthracene (2ac)**<sup>15</sup>: White solid (166 mg, 93%). <sup>1</sup>H NMR (600 MHz, CDCl<sub>3</sub>) δ 8.41 (s, 2H), 7.99 (dd, *J* = 6.3, 3.1 Hz, 4H), 7.45 (dd, *J* = 6.5, 3.1 Hz, 4H). <sup>13</sup>C NMR (151 MHz, CDCl<sub>3</sub>) δ 131.71, 128.19, 126.24, 125.36.

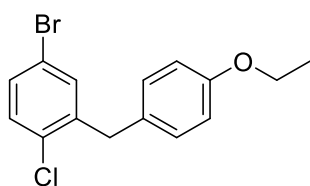

**4-bromo-1-chloro-2-(4-ethoxybenzyl)benzene (2ad)**<sup>16</sup>: White solid (309 mg, 96%). <sup>1</sup>H NMR (600 MHz, CDCl<sub>3</sub>) δ 7.29 – 7.22 (m, 2H), 7.21 (d, *J* = 8.4 Hz, 1H), 7.08 (d, *J* = 6.7 Hz, 2H), 6.83 (d, *J* = 8.4 Hz, 2H), 4.04 – 3.99 (m, 2H), 3.98 (s, 2H), 1.40 (t, *J* = 7.0 Hz, 3H). <sup>13</sup>C NMR (151 MHz, CDCl<sub>3</sub>) δ 157.69, 141.39, 133.58, 133.11, 130.89, 130.56, 130.41, 129.98, 120.49, 114.65, 63.43, 38.24, 14.91.

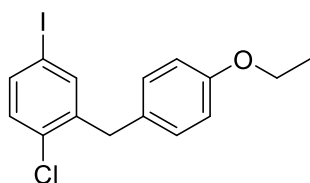

**1-chloro-2-(4-ethoxybenzyl)-4-iodobenzene (2ae)**<sup>17</sup>: White solid (369 mg, 98%). <sup>1</sup>H NMR (600 MHz, CDCl<sub>3</sub>) δ 7.48 – 7.42 (m, 2H), 7.07 (dd, *J* = 8.3, 3.2 Hz, 3H), 6.83 (d, *J* = 8.6 Hz, 2H), 4.01 (q, *J* = 7.0 Hz, 2H), 3.96 (s, 2H), 1.40 (t, *J* = 7.0 Hz, 3H). <sup>13</sup>C NMR (151 MHz, CDCl<sub>3</sub>) δ 157.64, 141.57, 139.54, 136.55, 134.22, 131.19, 130.47, 129.91, 114.62, 91.67, 63.43, 38.08, 14.90.

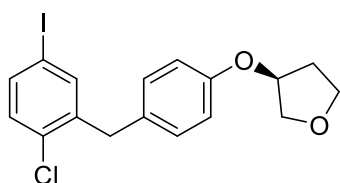

**(S)-3-(4-(2-chloro-5-iodobenzyl)phenoxy)tetrahydrofuran (2af)**<sup>18</sup>: White solid (351 mg, 85%). <sup>1</sup>H NMR (600 MHz, CDCl<sub>3</sub>) δ 7.48 – 7.42 (m, 2H), 7.08 (dd, *J* = 8.4, 2.8 Hz, 3H), 6.80 (s, 1H), 6.79 (s, 1H), 4.91 – 4.88 (m, 1H), 4.01 – 3.94 (m, 5H), 3.91 – 3.87 (m, 1H), 2.22 – 2.11 (m, 2H). <sup>13</sup>C NMR (151 MHz, CDCl<sub>3</sub>) δ 156.09, 141.40, 139.55, 136.62, 134.22, 131.22, 130.99, 130.01, 115.50, 91.68, 73.15, 67.22, 38.04, 33.03.

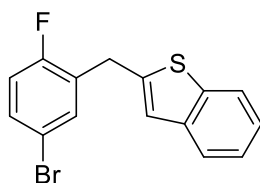

**2-(5-bromo-2-fluorobenzyl)benzo[b]thiophene (2ag)**<sup>19</sup>: White solid (303 mg, 95%). <sup>1</sup>H NMR (600 MHz, CDCl<sub>3</sub>) δ 7.74 (d, *J* = 7.8 Hz, 1H), 7.67 (d, *J* = 7.8 Hz, 1H), 7.42 – 7.36 (m, 1H), 7.36 – 7.29 (m, 2H), 7.29 – 7.25 (m, 1H), 7.03 (s, 1H), 6.96 (t, *J* = 9.0 Hz, 1H), 4.20 (s, 2H). <sup>13</sup>C NMR (151 MHz, CDCl<sub>3</sub>) δ 159.82 (d, *J* = 247.0 Hz), 142.21 (s), 139.87 (d, *J* = 17.6 Hz), 133.53 (d, *J* = 4.0 Hz), 131.55, 131.49, 128.93 (d, *J* = 17.4 Hz), 124.33, 123.98, 123.1, 122.31, 122.22, 117.28 (d, *J* = 23.9 Hz), 116.71 (d, *J* = 3.5 Hz), 29.66 (d, *J* = 3.2 Hz).

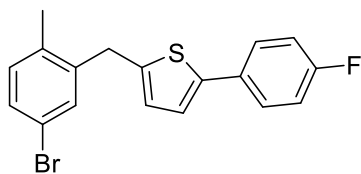

**2-(5-bromo-2-methylbenzyl)-5-(4-fluorophenyl)thiophene (2ah)**<sup>16</sup>: White solid (207 mg, 87%). <sup>1</sup>H NMR (600 MHz, CDCl<sub>3</sub>) δ 7.48 (dd, *J* = 8.3, 5.4 Hz, 2H), 7.34 (s, 1H), 7.29 (d, *J* = 8.1 Hz, 1H), 7.12 – 6.99 (m, 4H), 6.67 (d, *J* = 3.1 Hz, 1H), 4.07 (s, 2H), 2.27 (s, 3H). <sup>13</sup>C NMR (151 MHz, CDCl<sub>3</sub>) δ 162.17 (d, *J* = 246.8 Hz), 142.21, 141.88, 140.36, 135.32, 132.13 (d, *J* = 17.3 Hz), 130.74 (d, *J* = 3.2 Hz), 129.93, 127.21, 127.16, 126.28, 122.75, 119.68, 115.76 (d, *J* = 21.8 Hz), 33.84, 19.04.

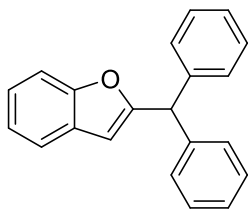

**2-benzhydrylbenzofuran<sup>20</sup>**: White solid (242 mg, 85%). <sup>1</sup>H NMR (600 MHz, CDCl<sub>3</sub>) δ 7.46 (d, *J* = 7.4 Hz, 1H), 7.40 (d, *J* = 8.1 Hz, 1H), 7.32 (t, *J* = 7.5 Hz, 4H), 7.26 (d, *J* = 7.2 Hz, 2H), 7.25 – 7.20 (m, 5H), 7.18 (t, *J* = 7.4 Hz, 1H), 6.27 (s, 1H), 5.58 (s, 1H). <sup>13</sup>C NMR (151 MHz, CDCl<sub>3</sub>) δ 159.94, 155.15, 141.05, 128.93, 128.61, 128.50, 127.03, 123.77, 122.65, 120.68, 111.20, 105.69, 51.36.

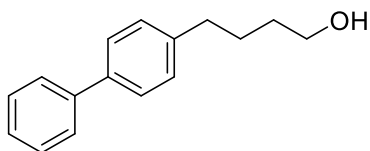

**4-([1,1'-biphenyl]-4-yl)butan-1-ol<sup>21</sup>**: White solid (181 mg, 80%). <sup>1</sup>H NMR (600 MHz, CDCl<sub>3</sub>) δ 7.58 (d, *J* = 7.4 Hz, 2H), 7.51 (d, *J* = 8.0 Hz, 2H), 7.42 (t, *J* = 7.6 Hz, 2H), 7.32 (t, *J* = 7.4 Hz, 1H), 7.26 (d, *J* = 6.8 Hz, 2H), 3.68 (t, *J* = 6.5 Hz, 2H), 2.69 (t, *J* = 7.6 Hz, 2H), 1.79 – 1.70 (m, 2H), 1.68 – 1.60 (m, 2H). <sup>13</sup>C NMR (151 MHz, CDCl<sub>3</sub>) δ 141.47, 141.12, 138.77, 128.85, 128.73, 127.08, 127.02, 127.01, 62.85, 35.28, 32.37, 27.54.

## 5. Copies of $^1\text{H}$ and $^{13}\text{C}$ NMR spectra of all products

### 4-ethyl-1,1'-biphenyl (2a)

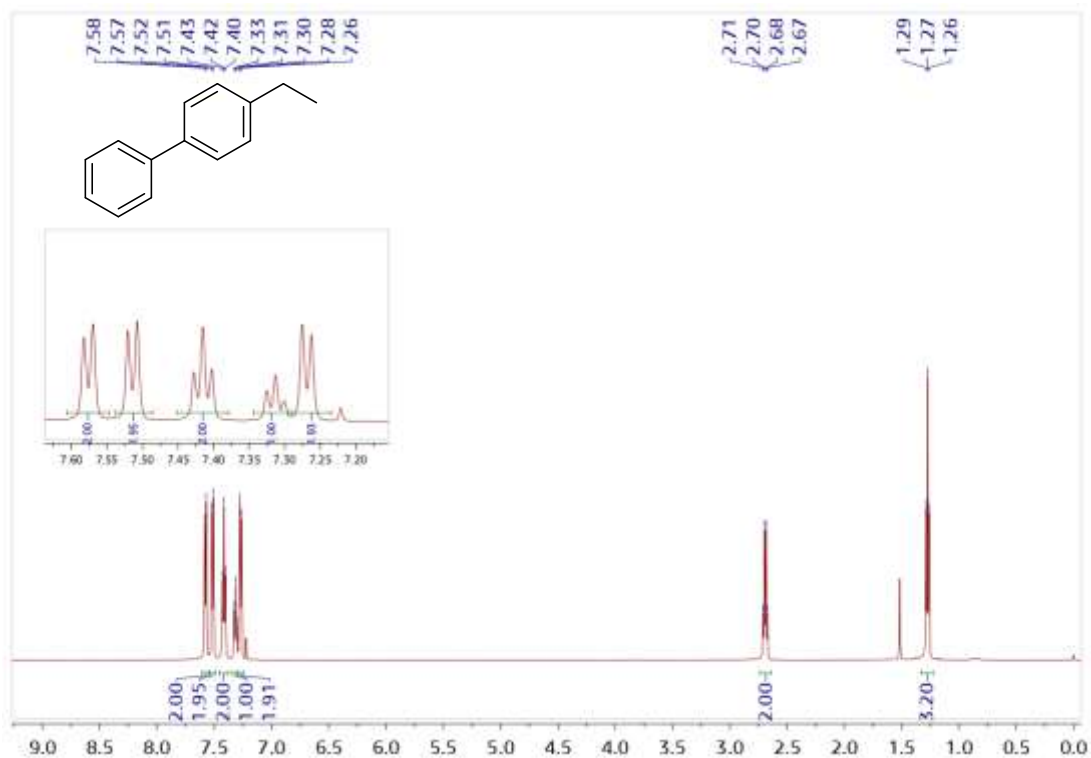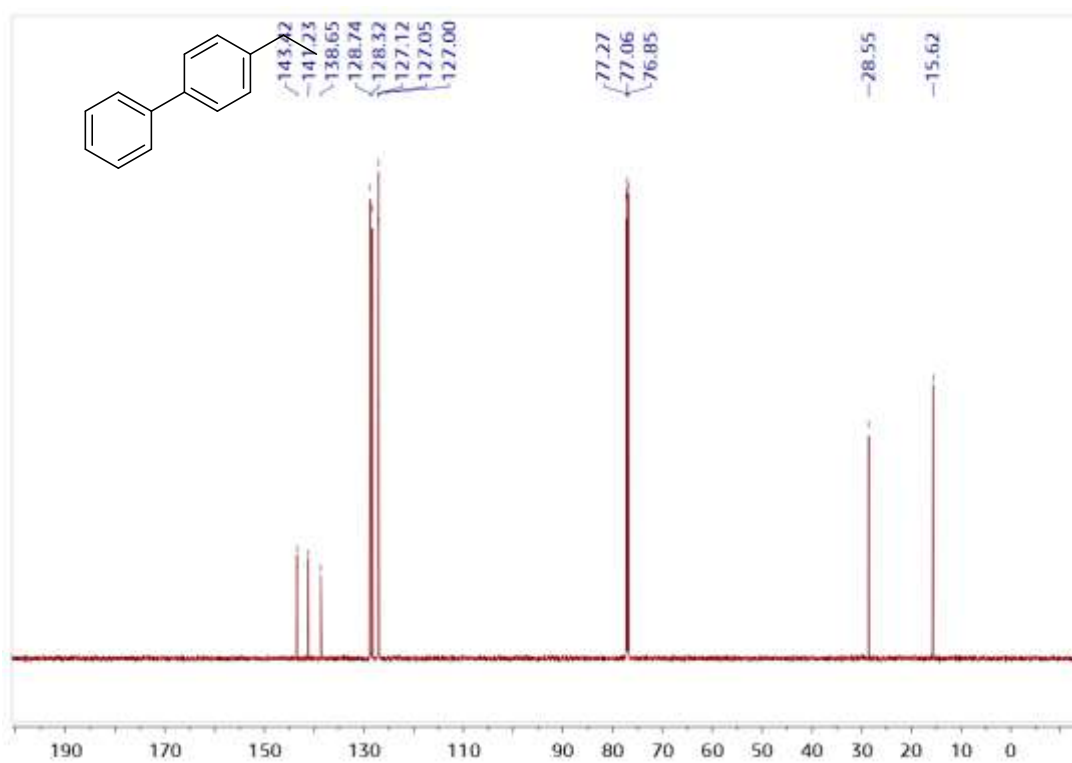

# 1-ethyl-4-methylbenzene (2b)

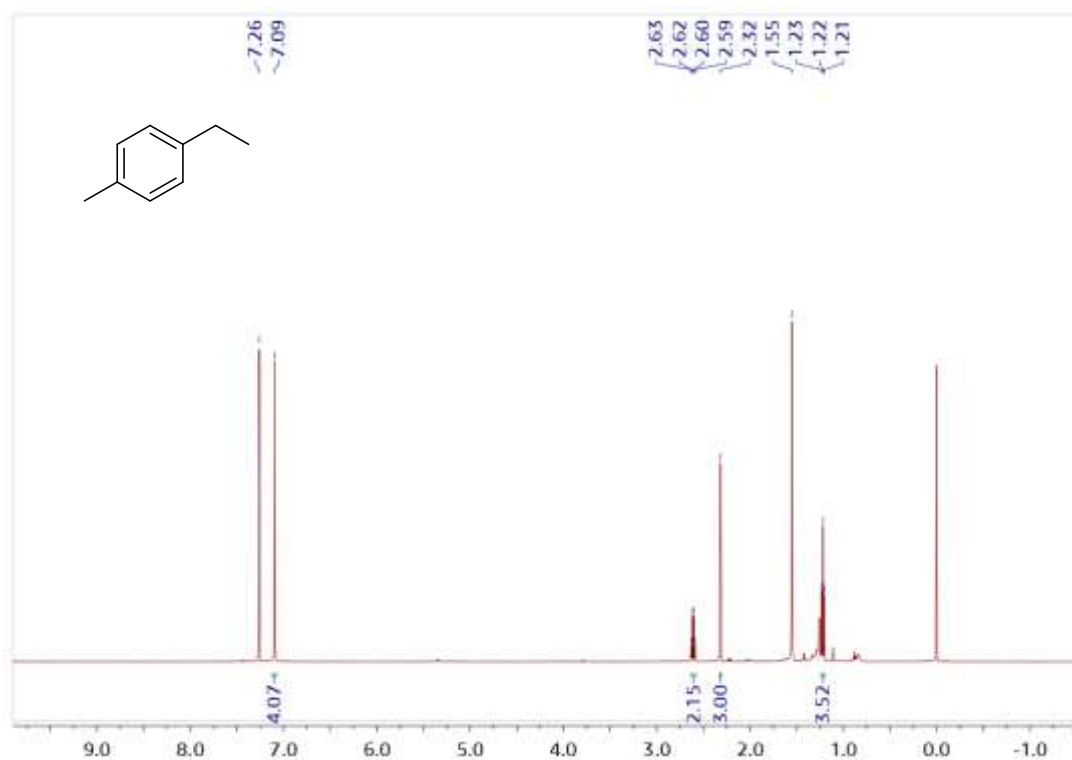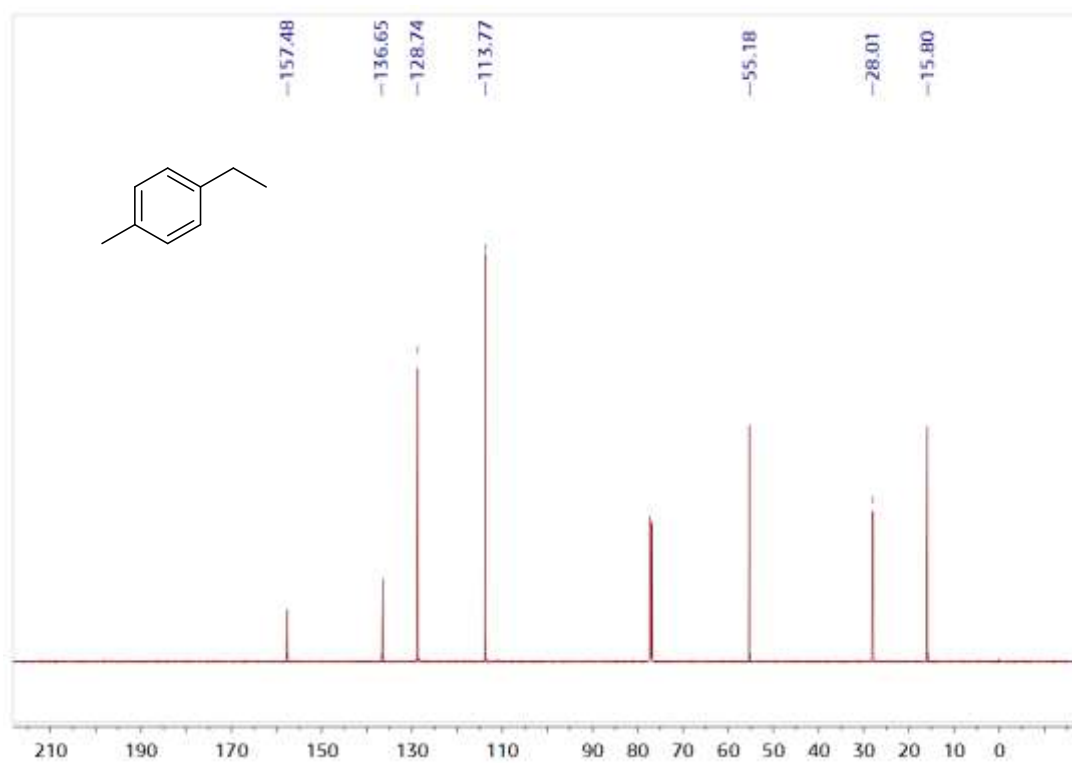

# 1-ethyl-4-methoxybenzene (2c)

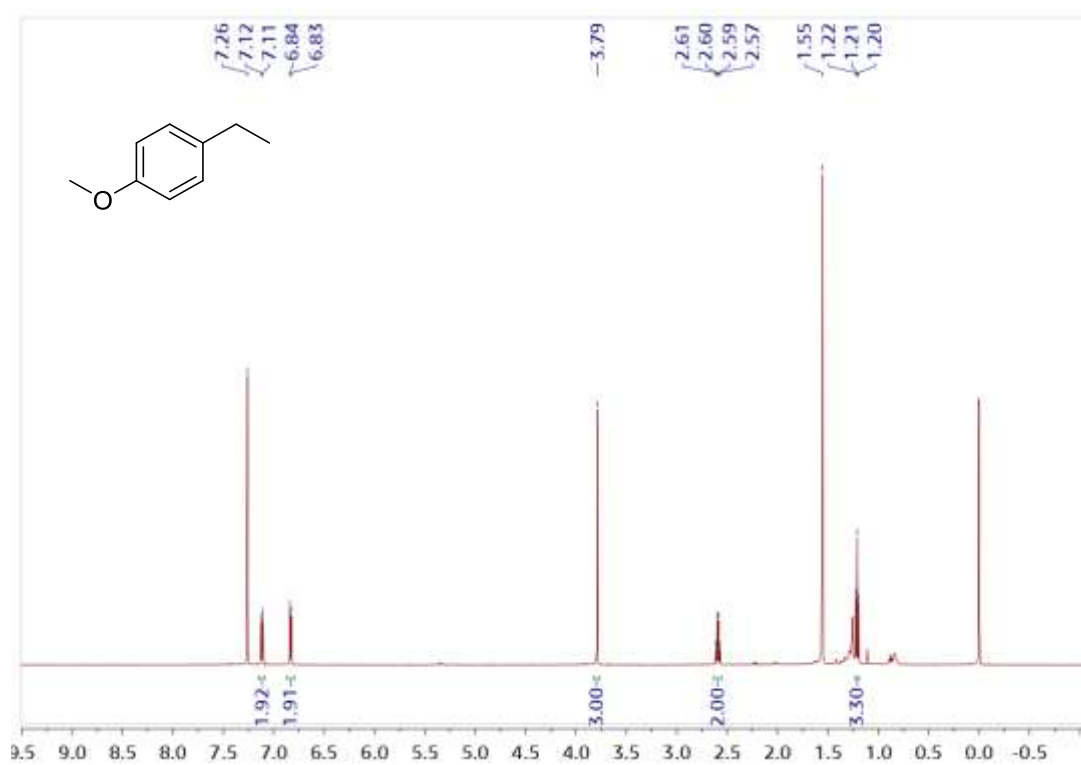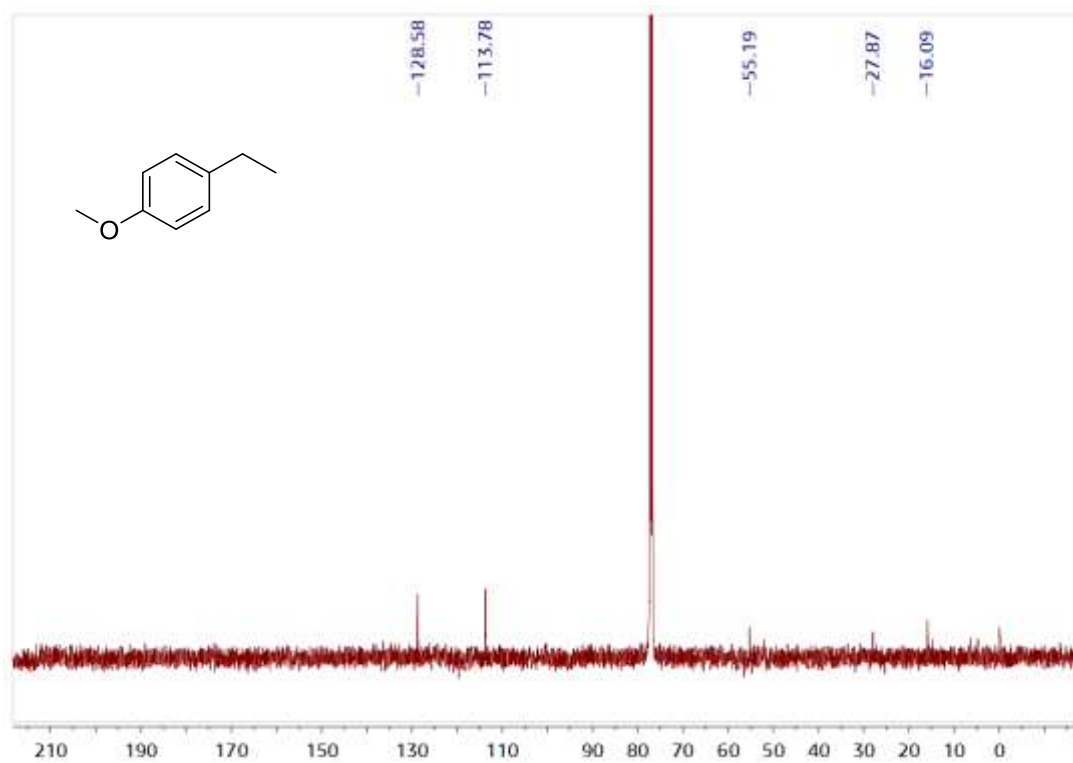



# 1-cyclohexyl-4-ethylbenzene (2d)

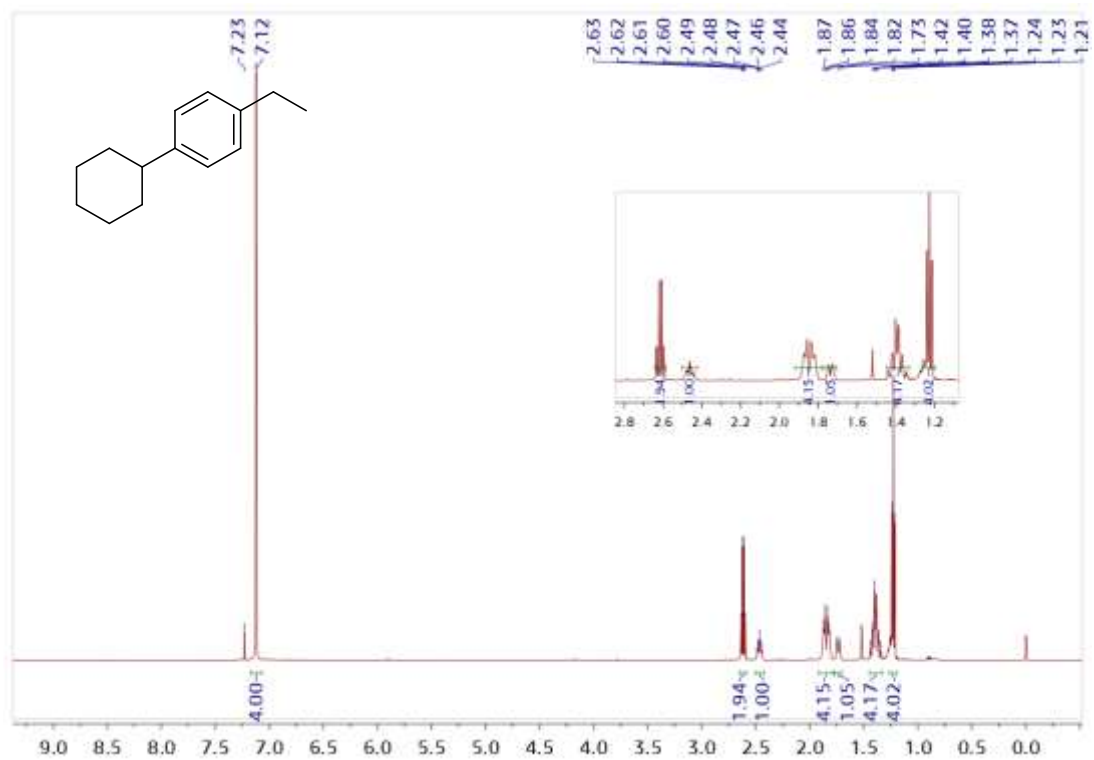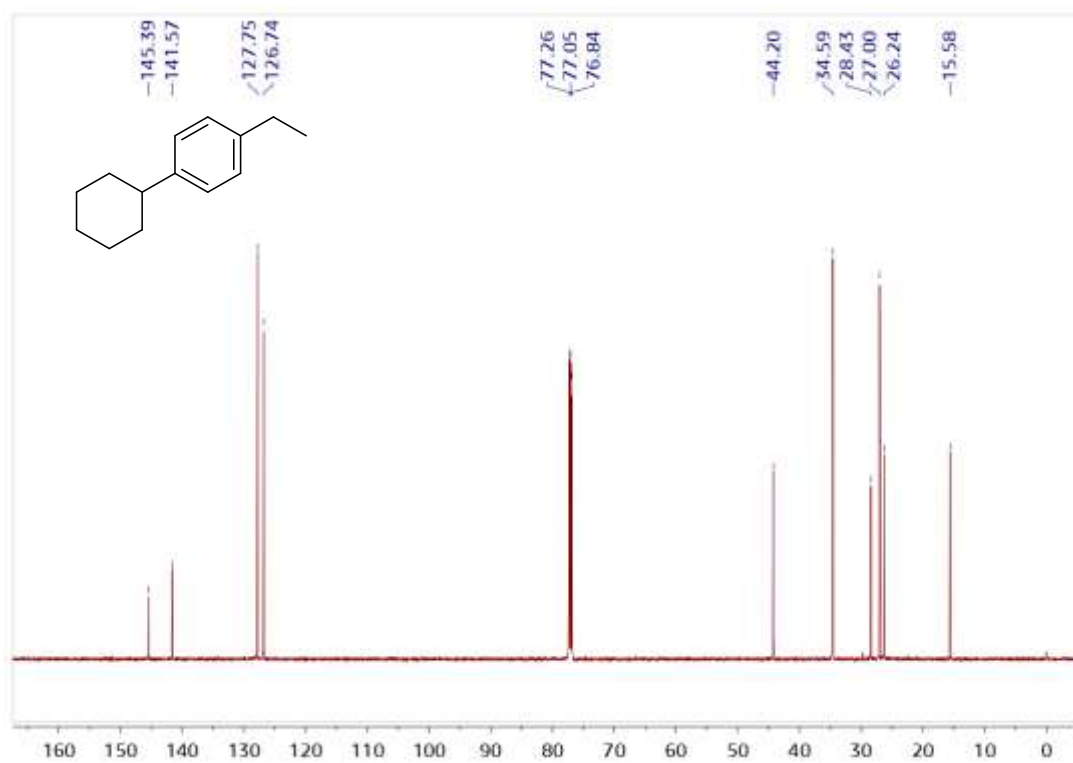

# 5-ethylbenzo[d][1,3]dioxole (2e)

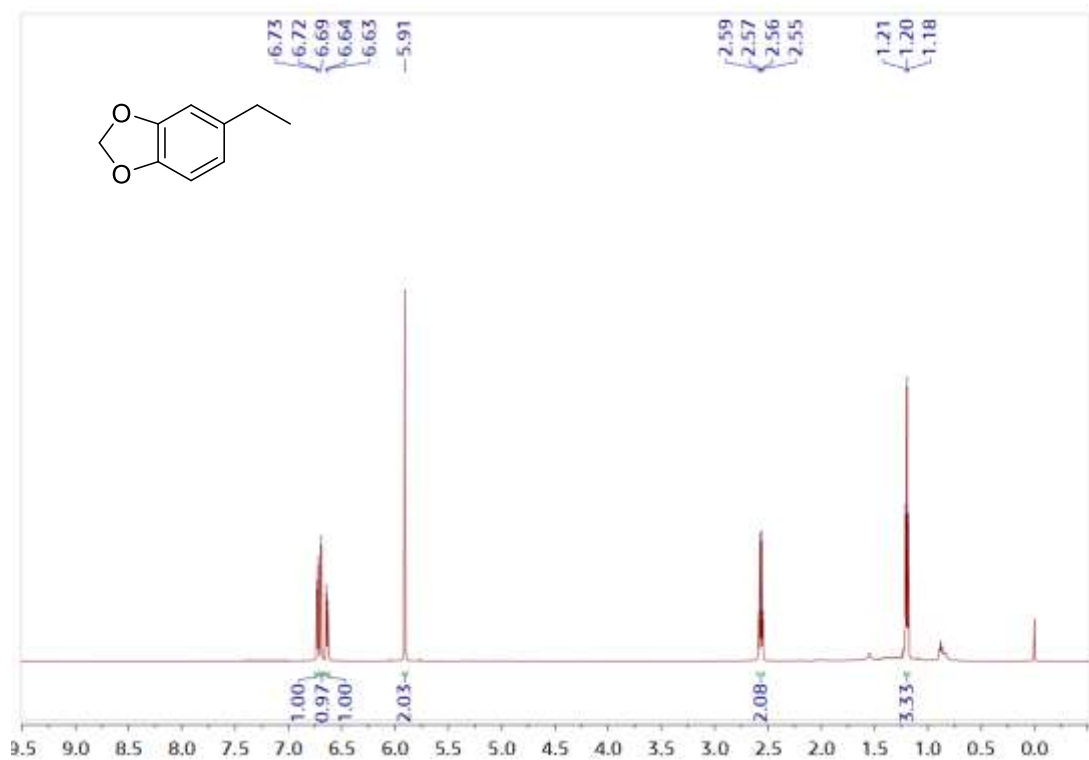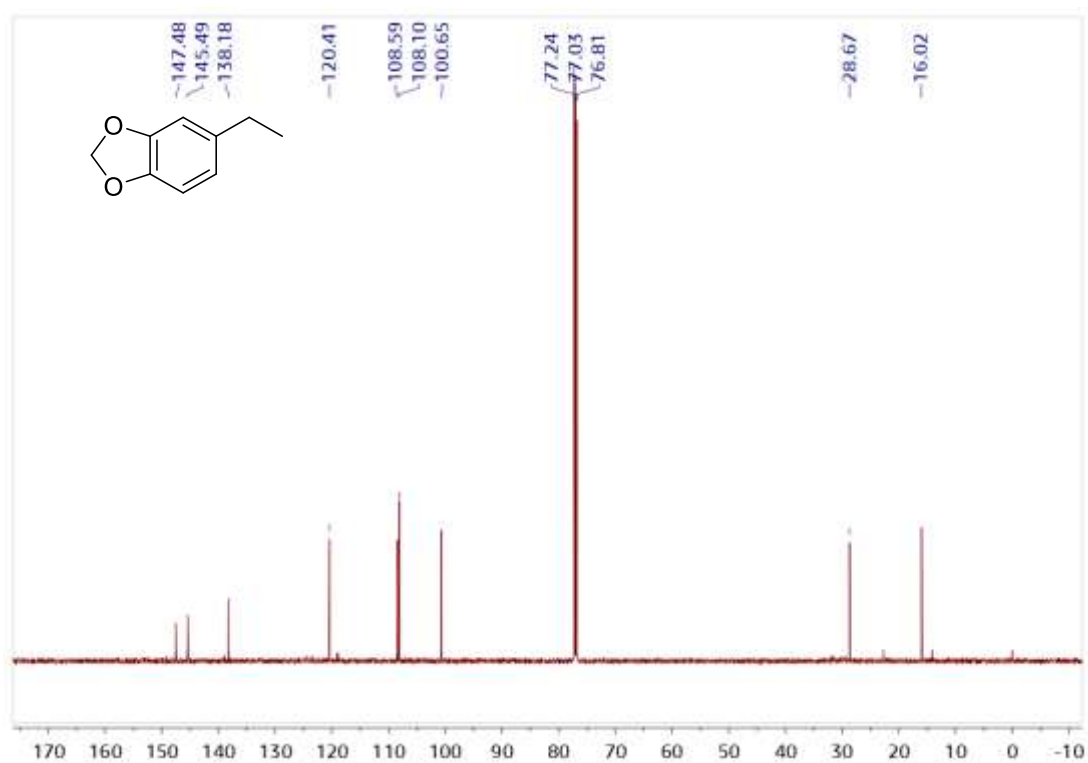

### 4-ethylaniline (2f)

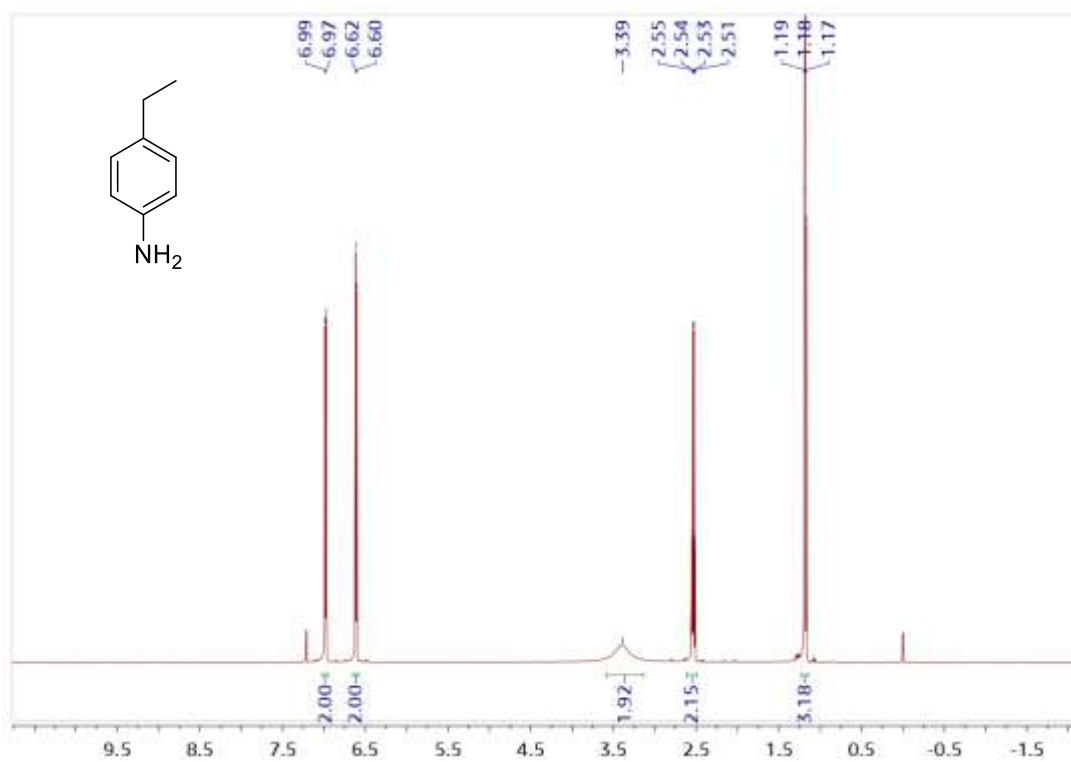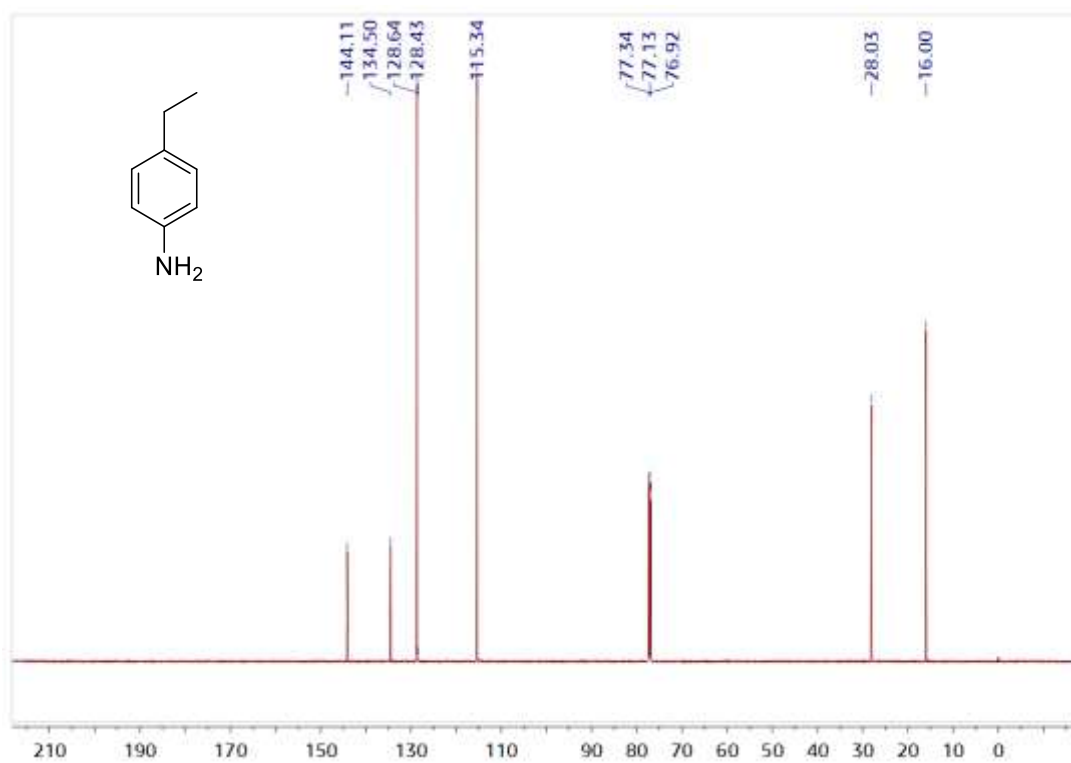

### 5-ethyl-2-methoxyphenol (2g)

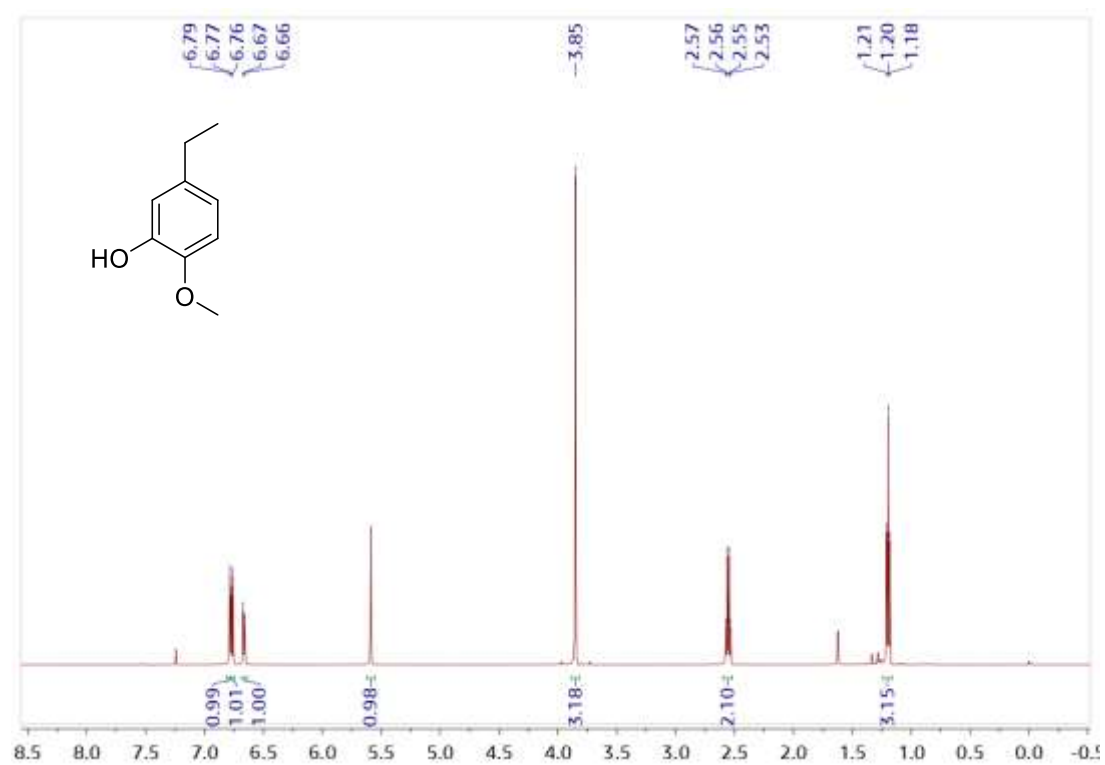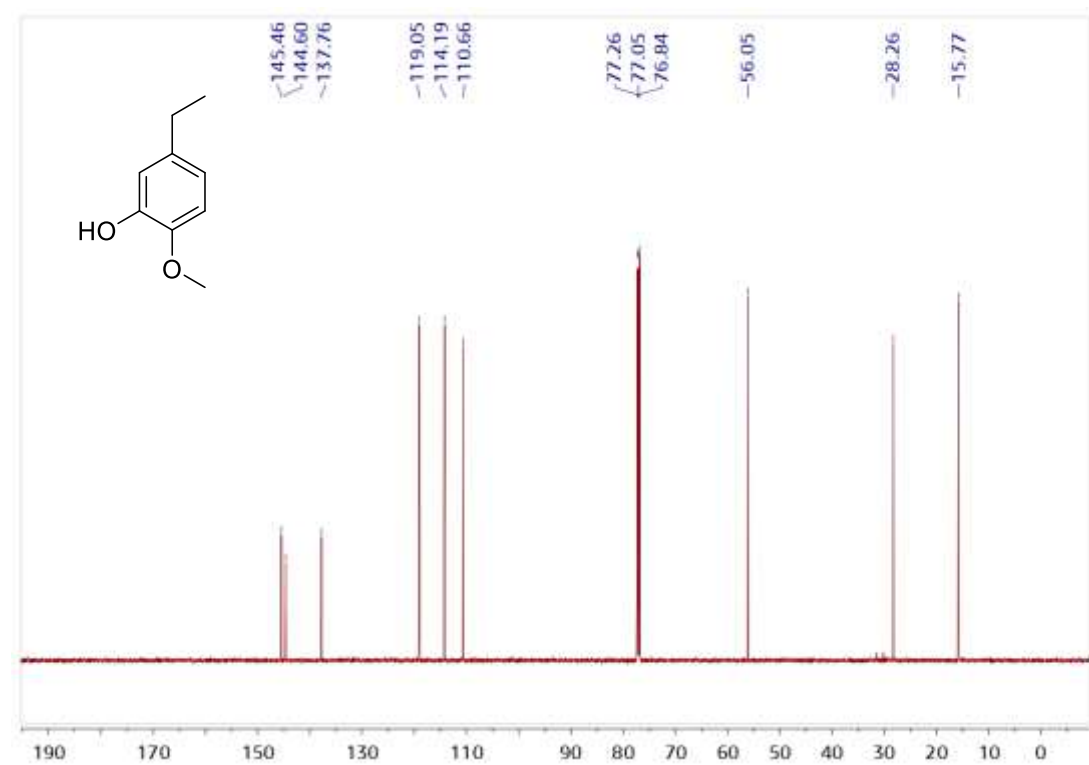

### 1-(benzyloxy)-4-ethylbenzene (2h)

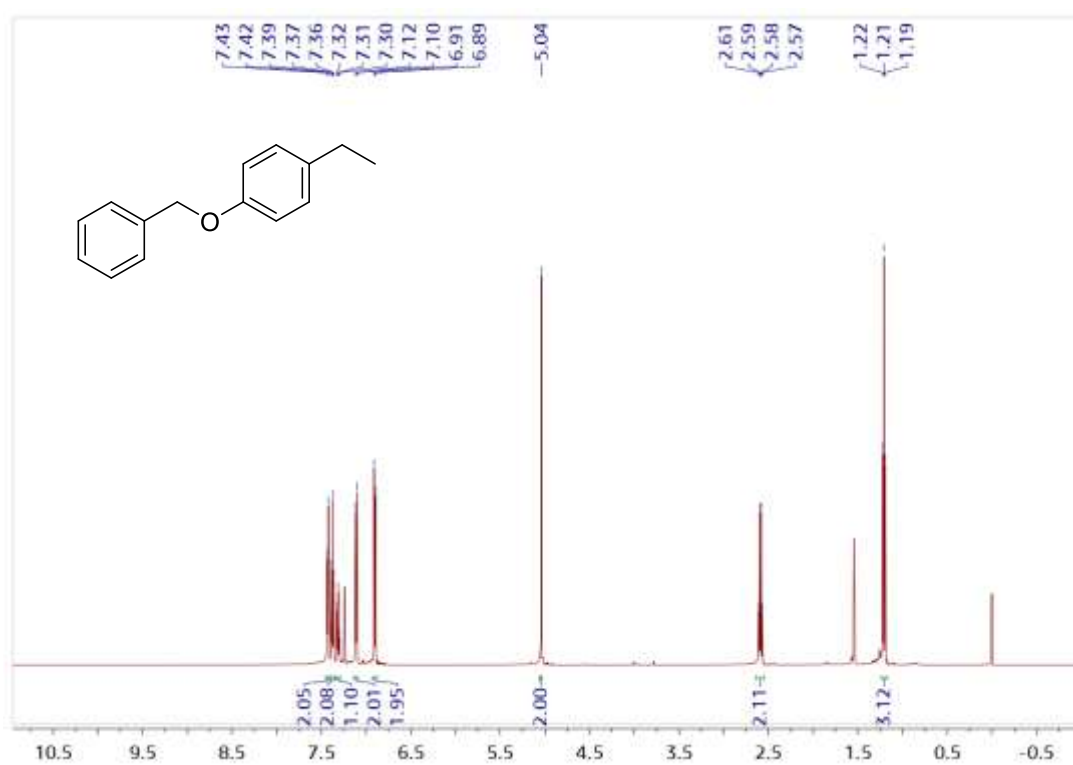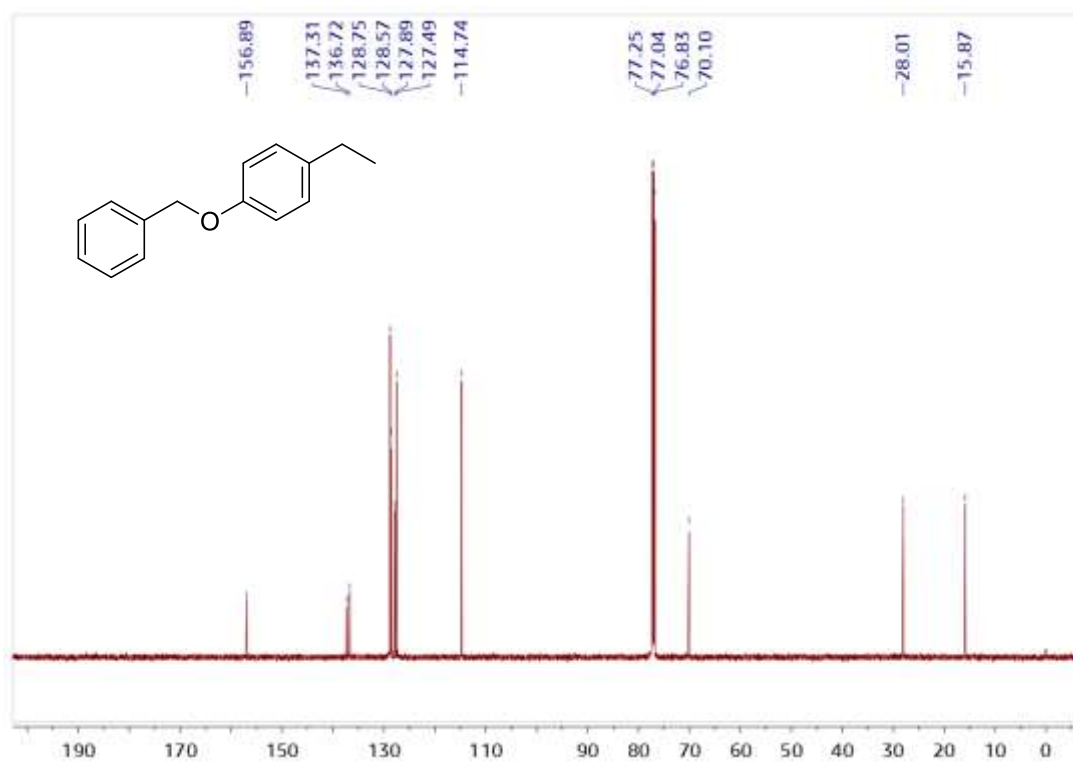

# 1-ethynaphthalene (2i)

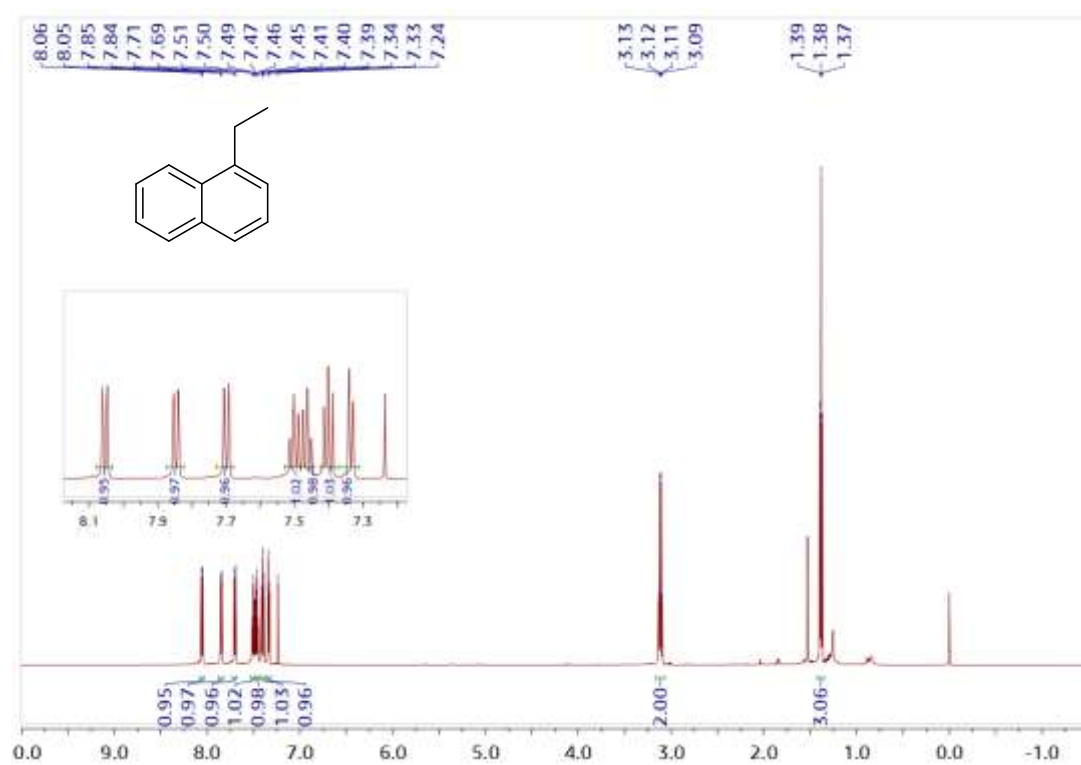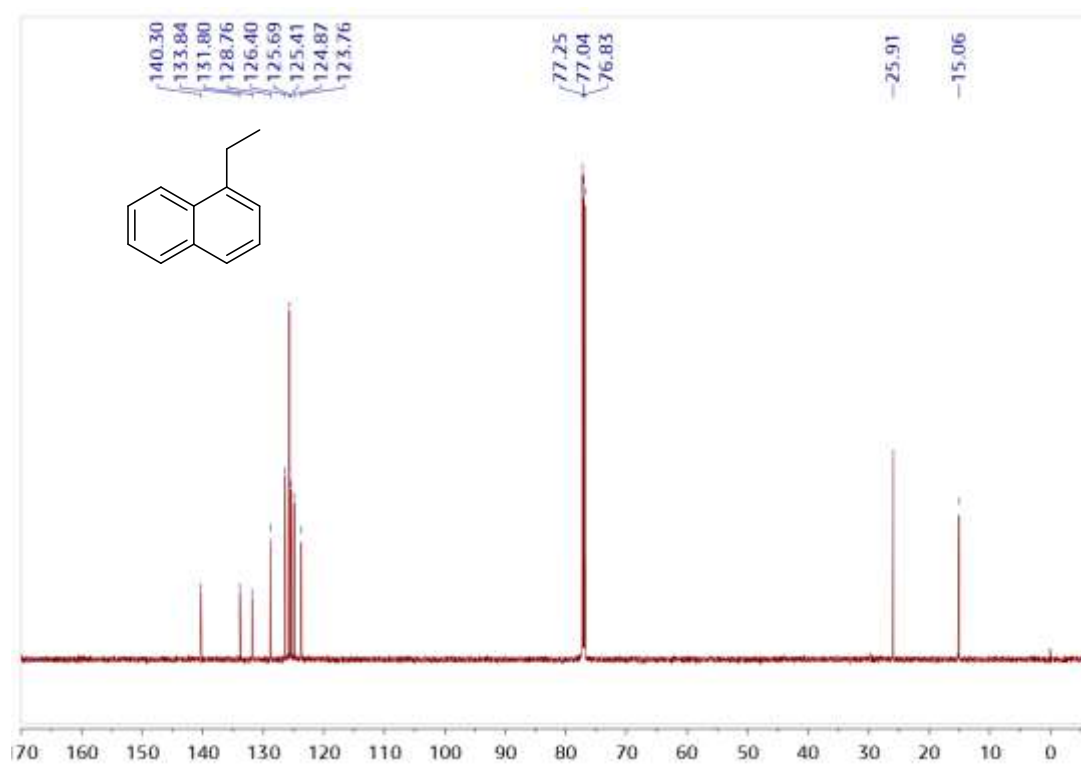

# Butylbenzene (2j)

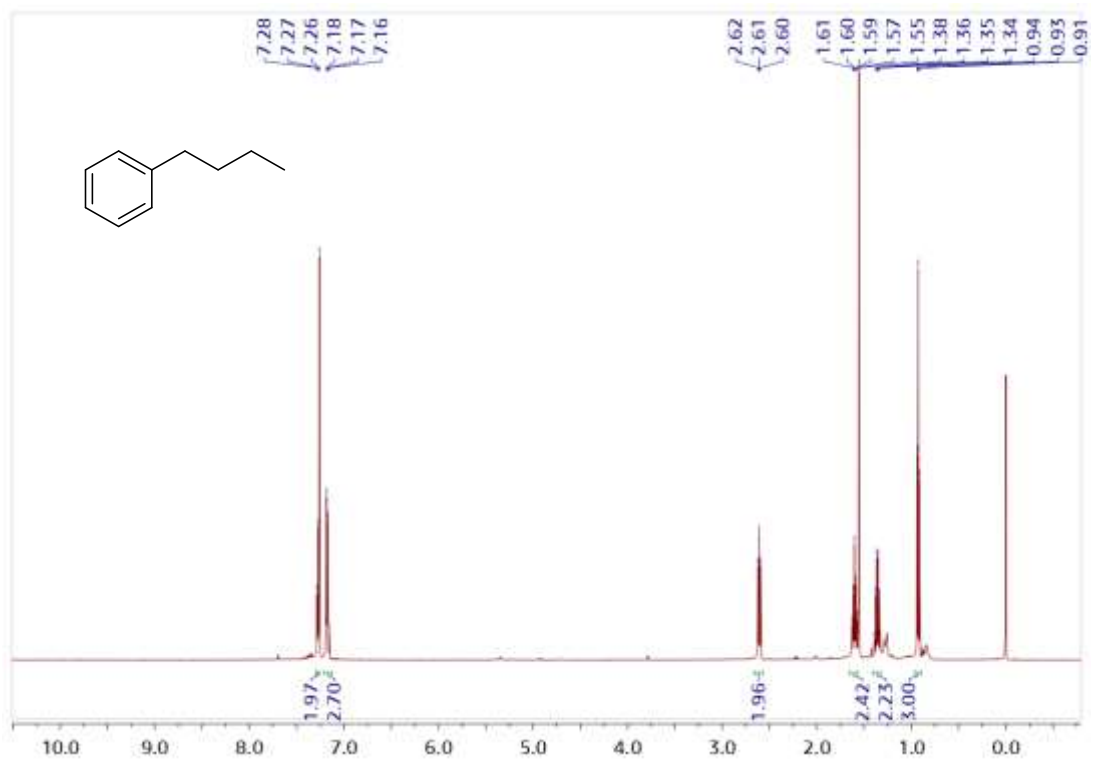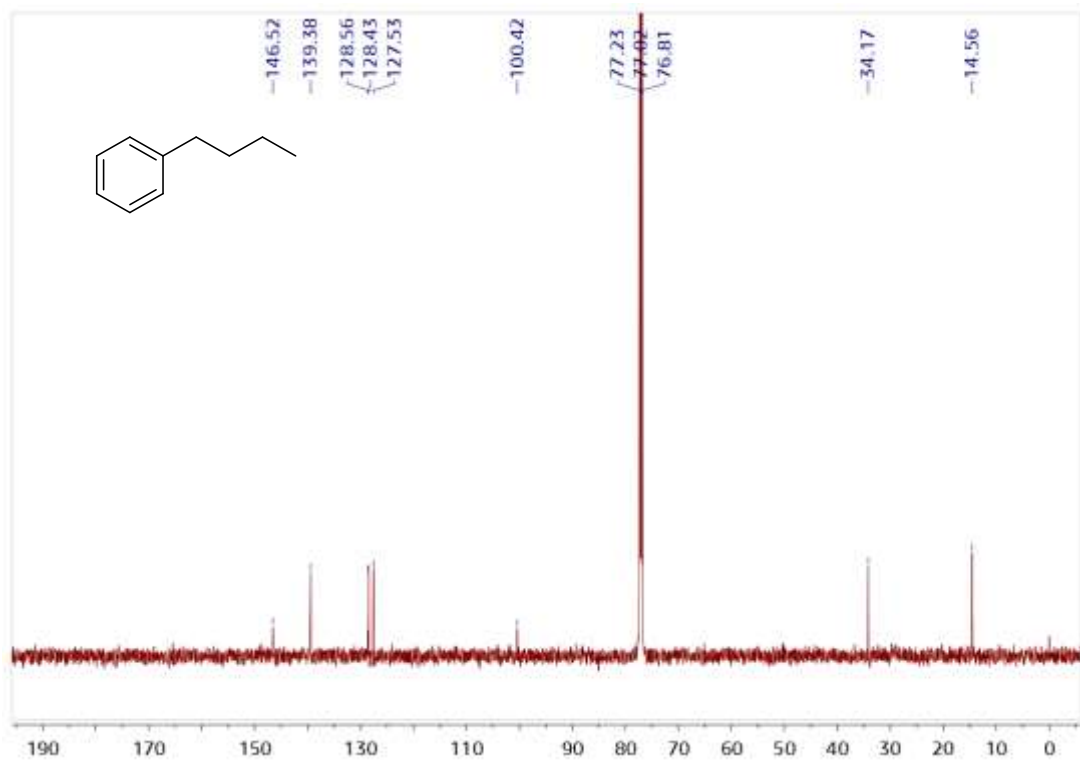

# 1,2-diphenylethane (2k)

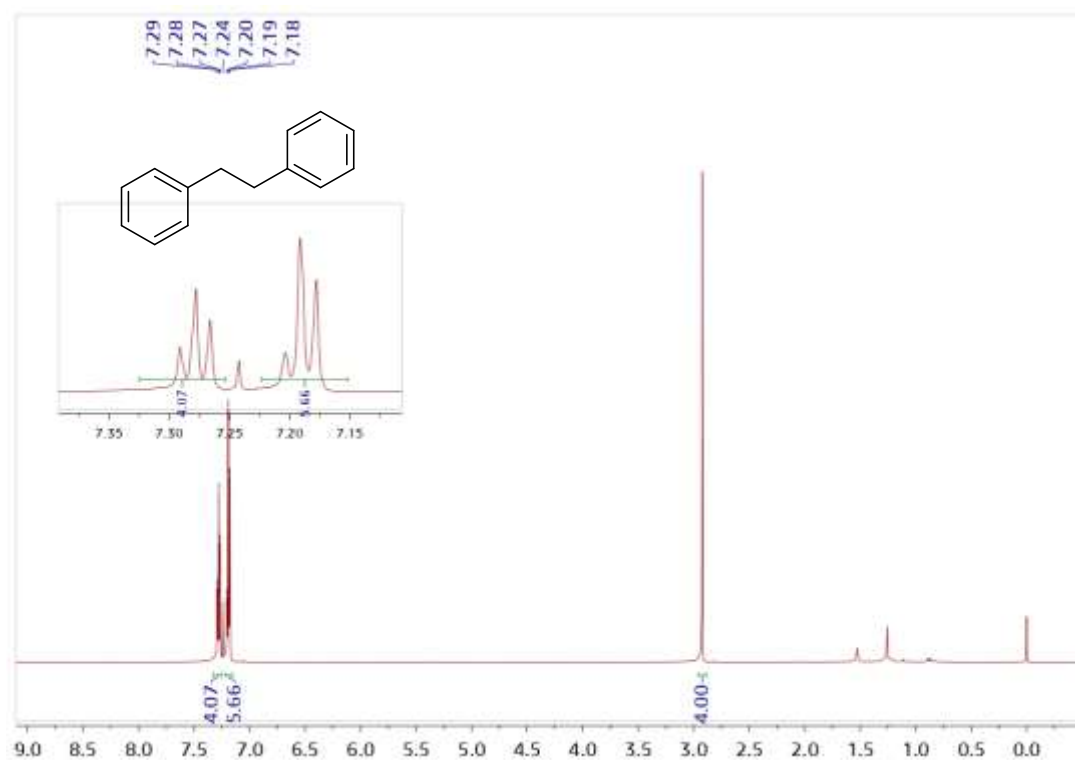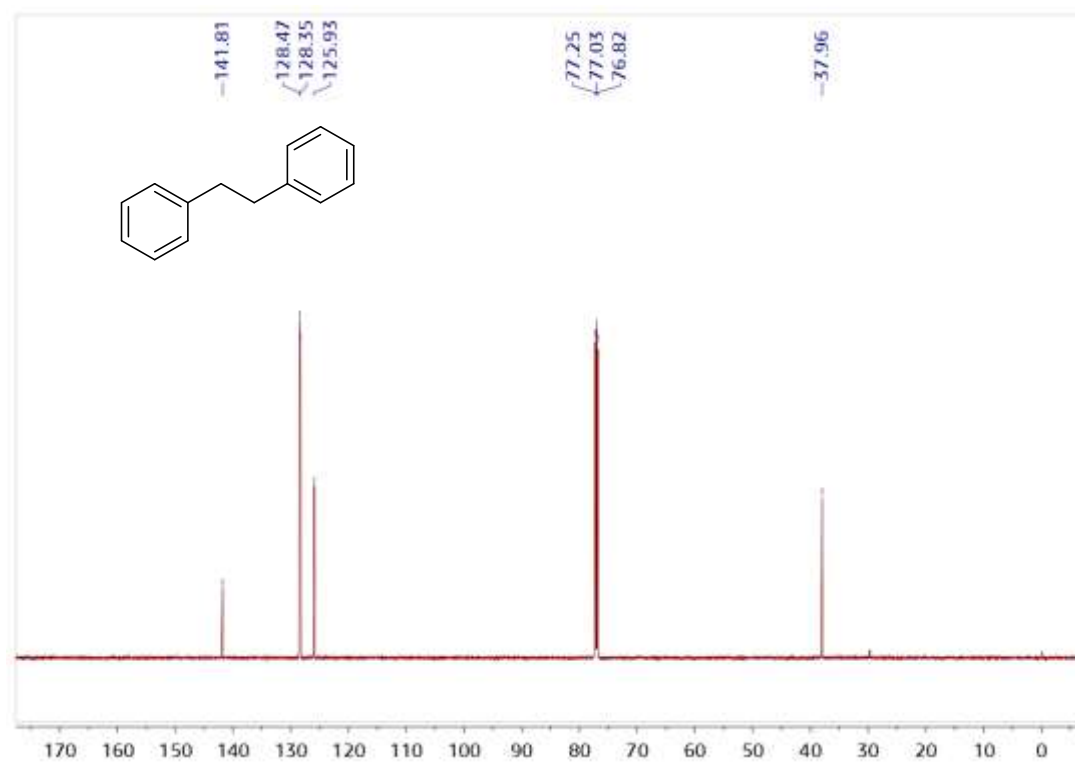



### 2,3-dihydro-1H-indene (2l)

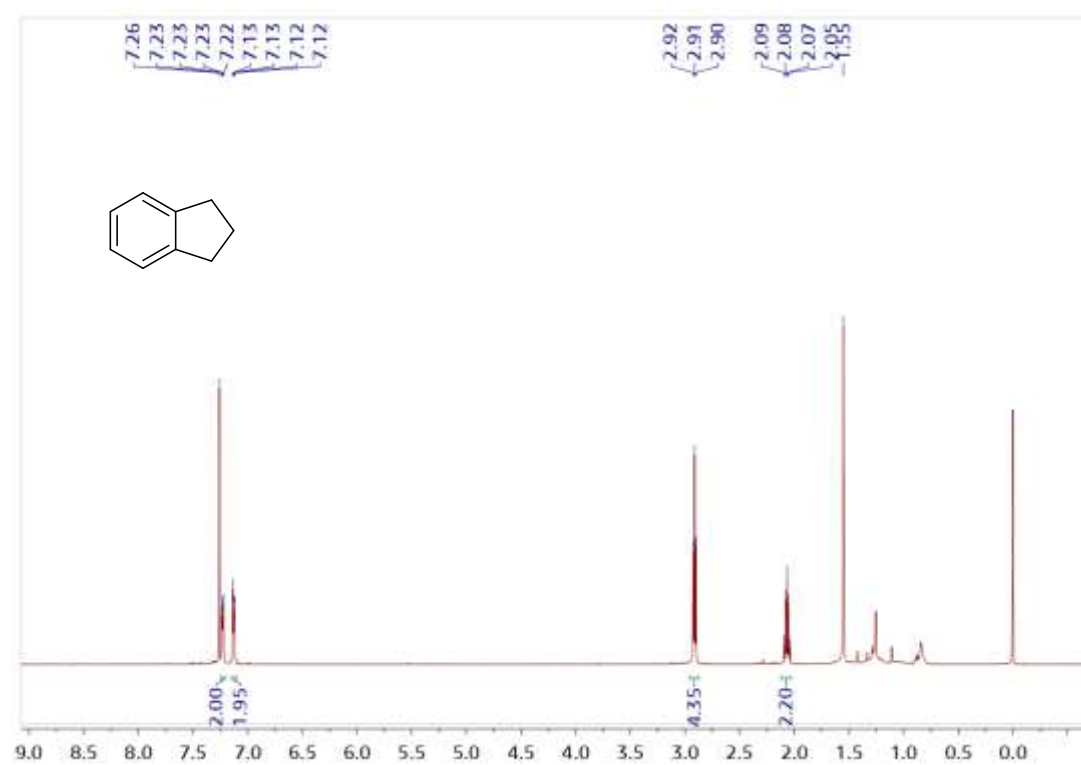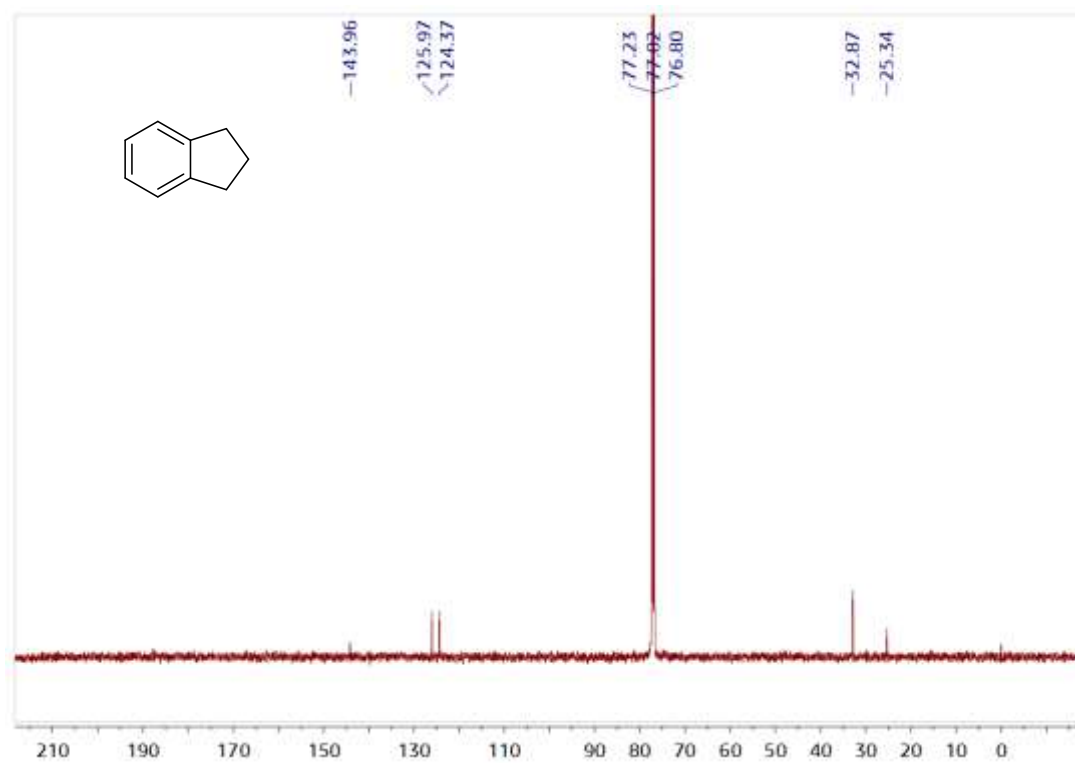

## 2-ethylbenzo[b]thiophene (2m)

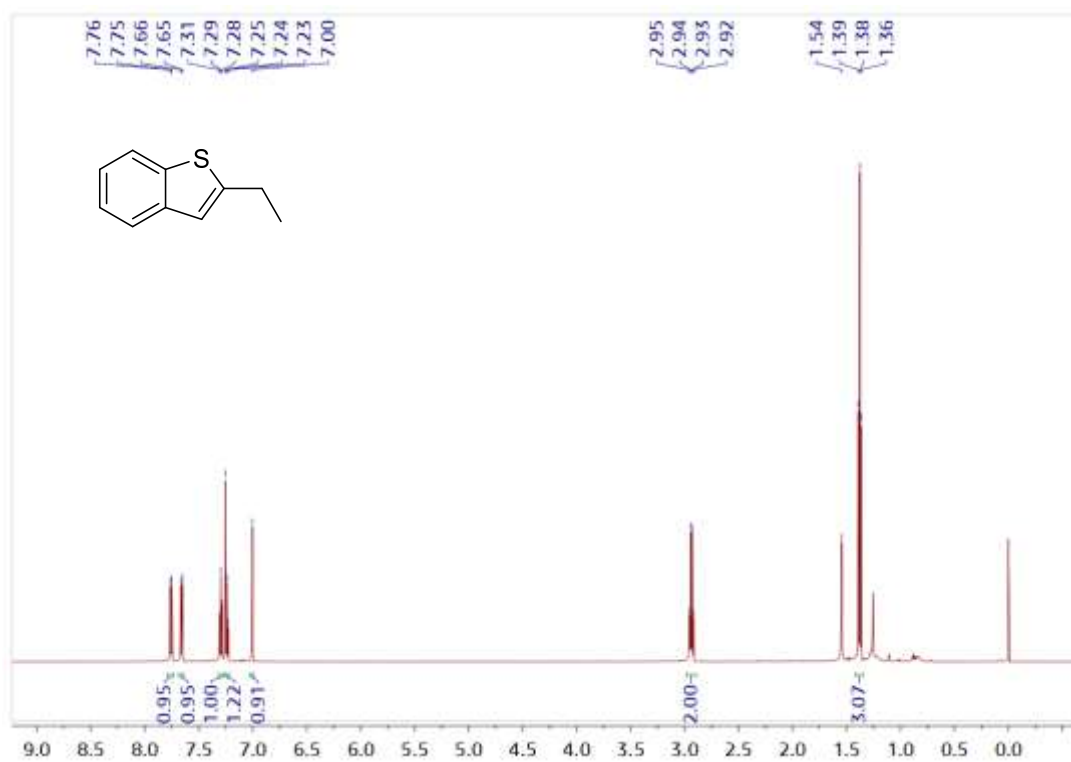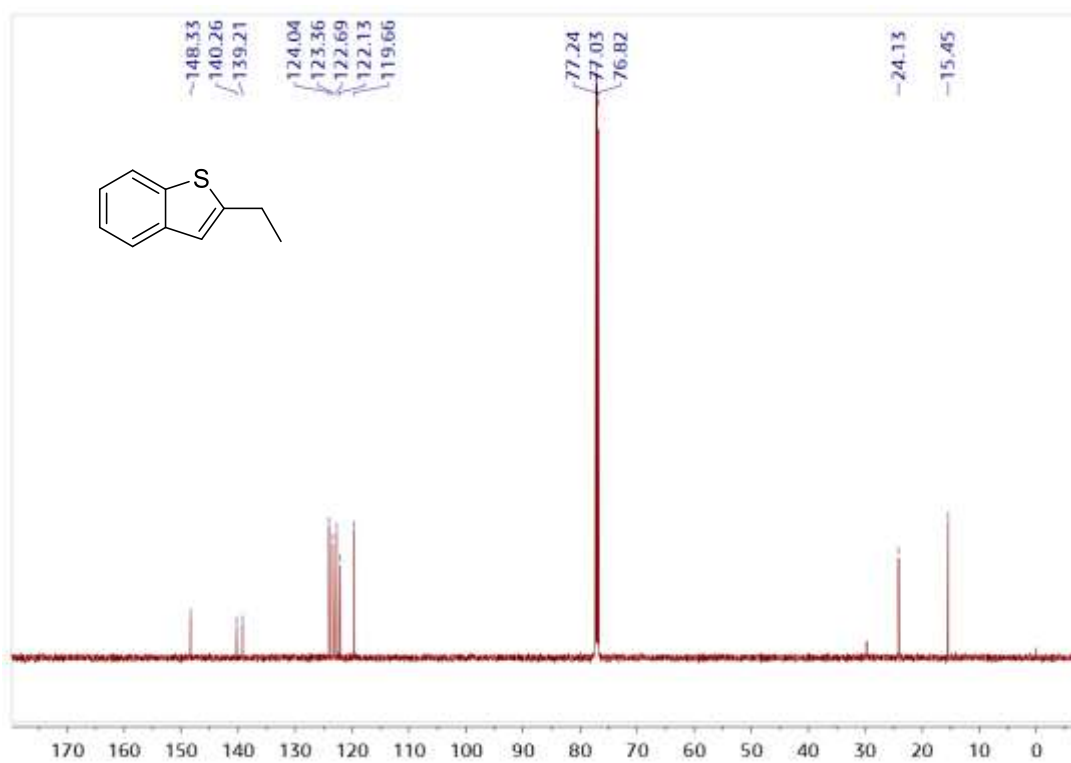

## 2-ethylbenzofuran (2n)

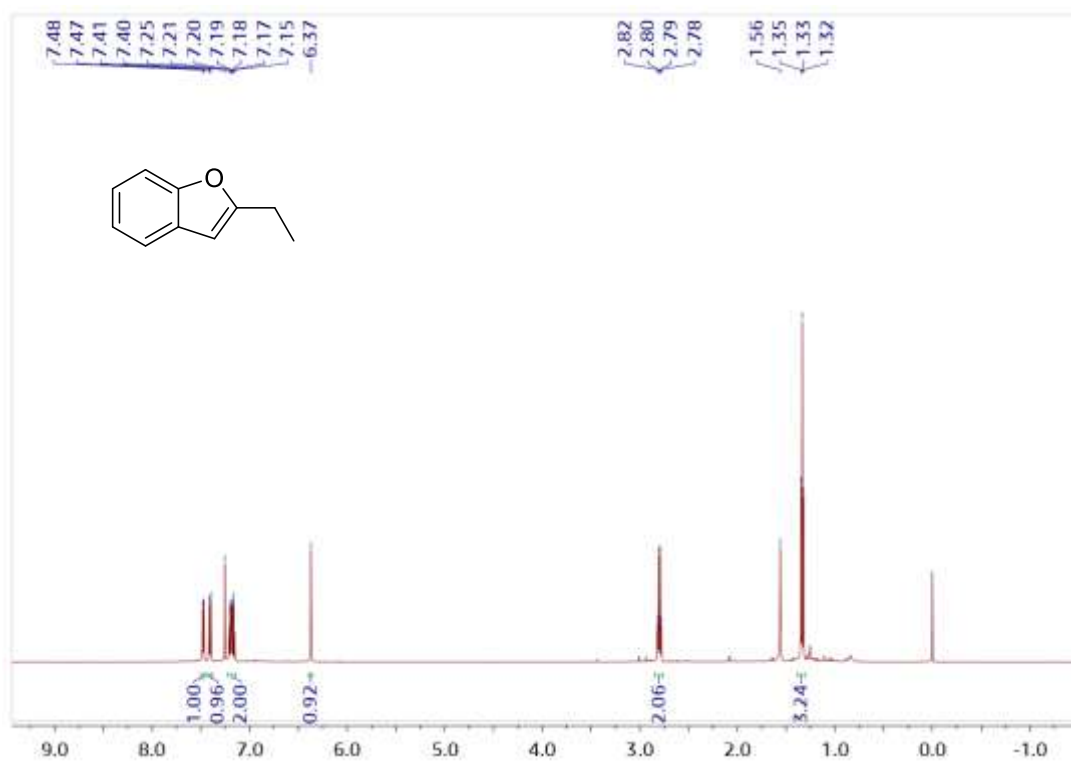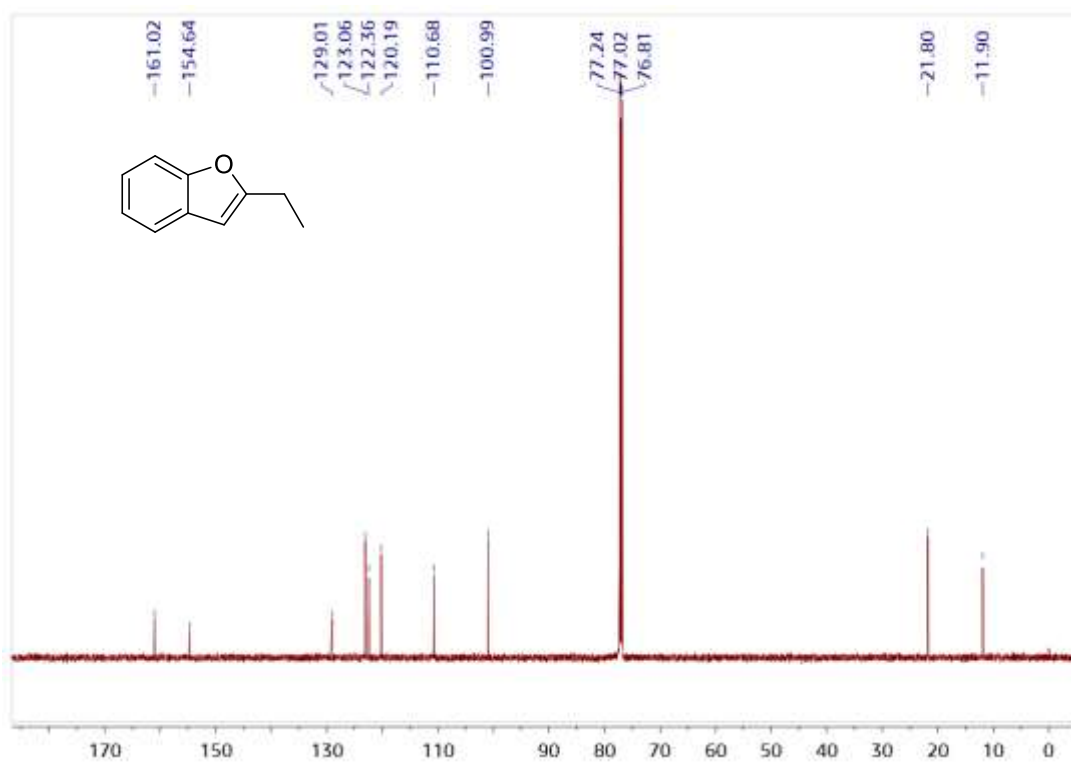

# Chromane (2o)

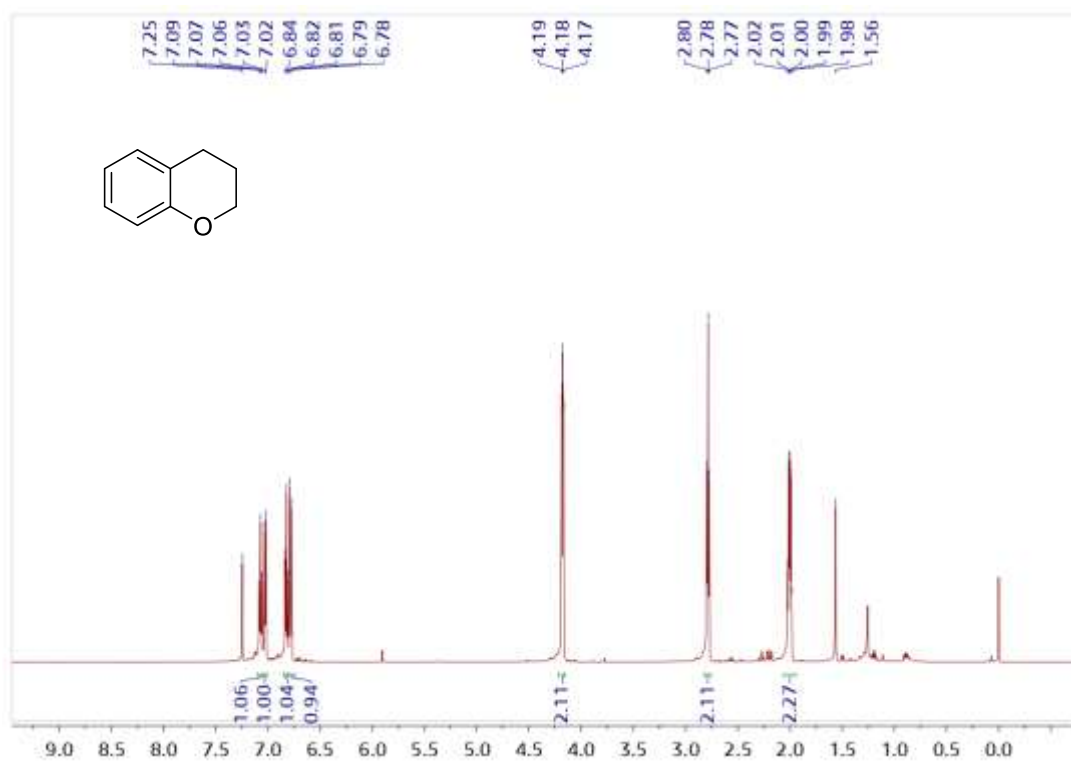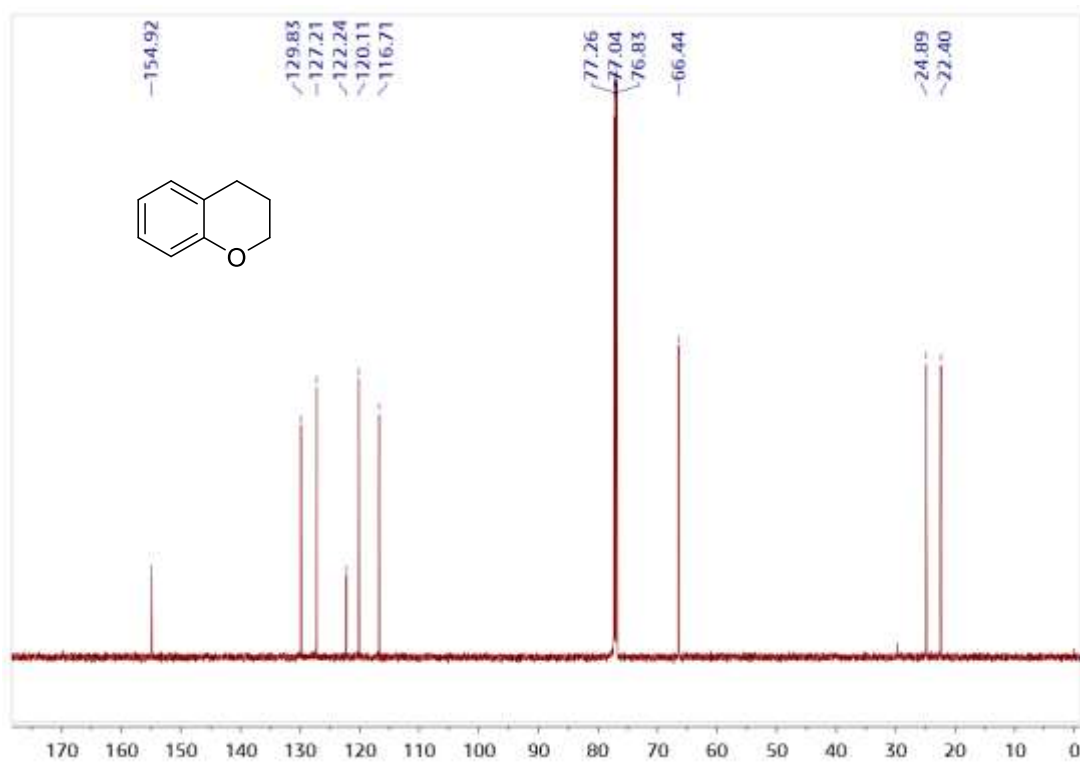

## 2-methoxy-5-methylphenol (2p)

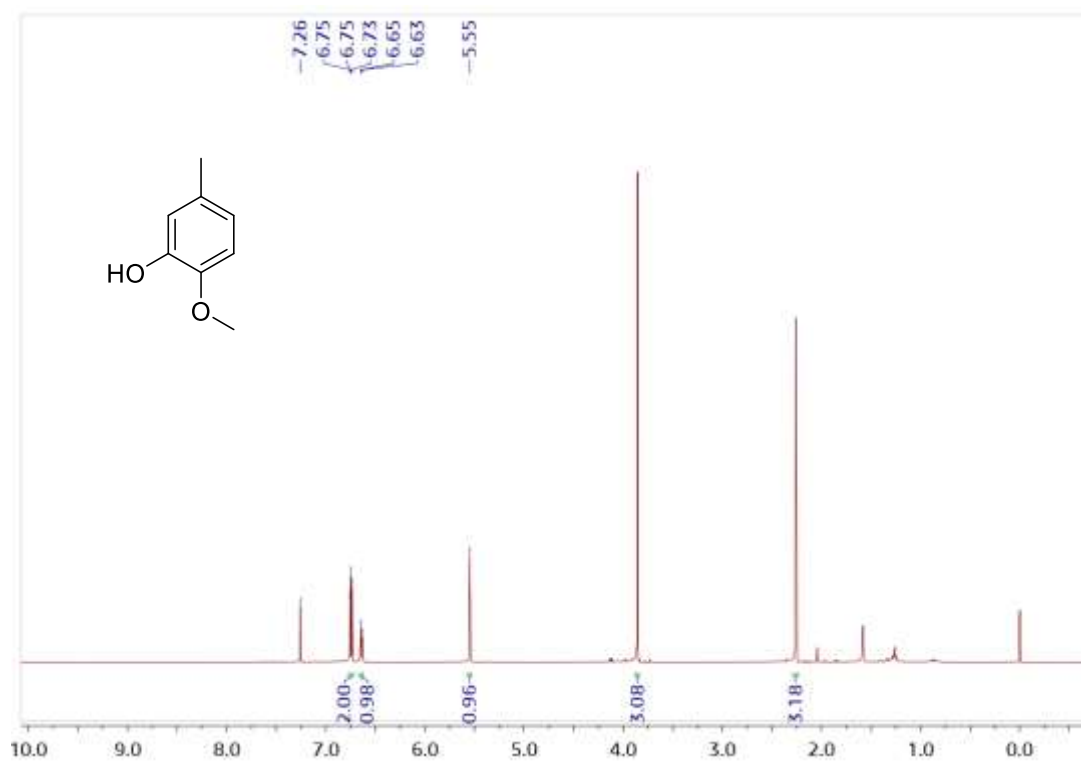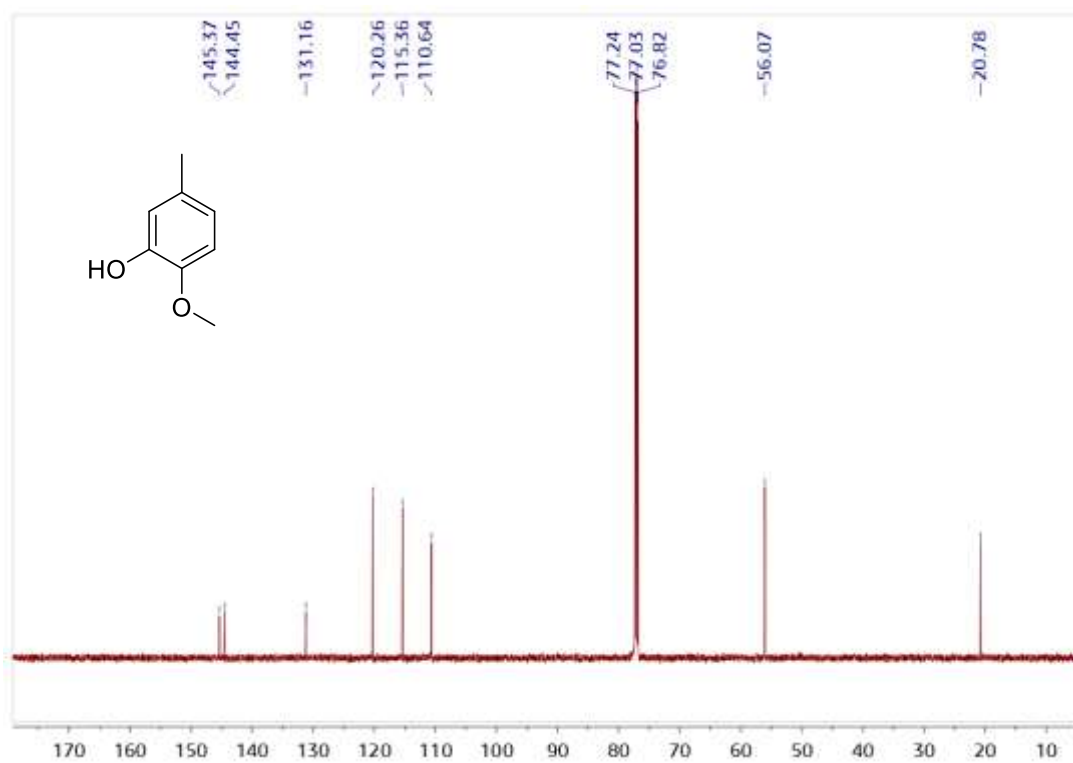

### 3-iodo-2-methoxy-5-methylphenol (2q)

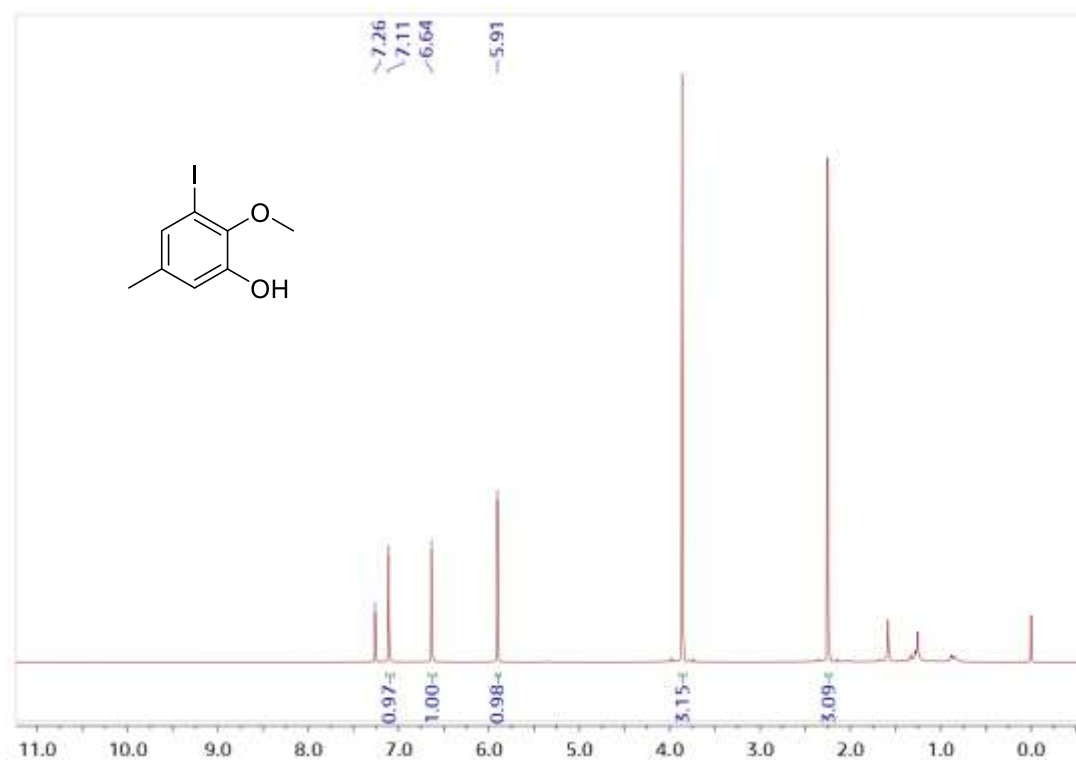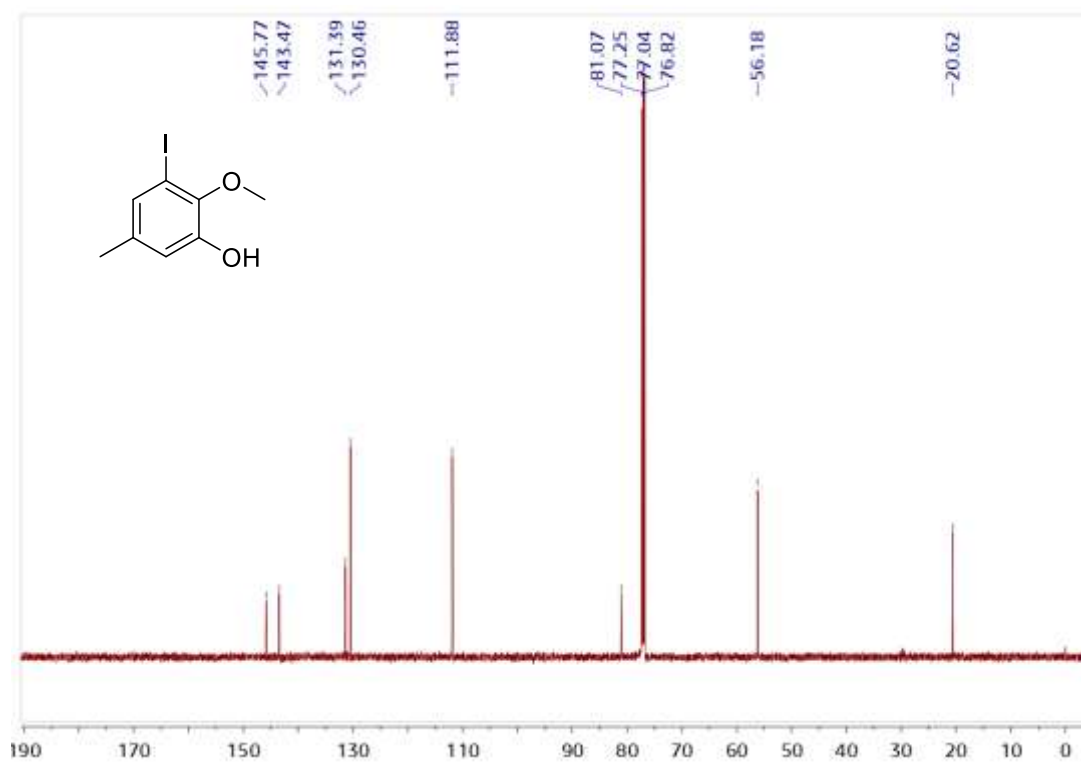

## Diphenylmethane (2r)

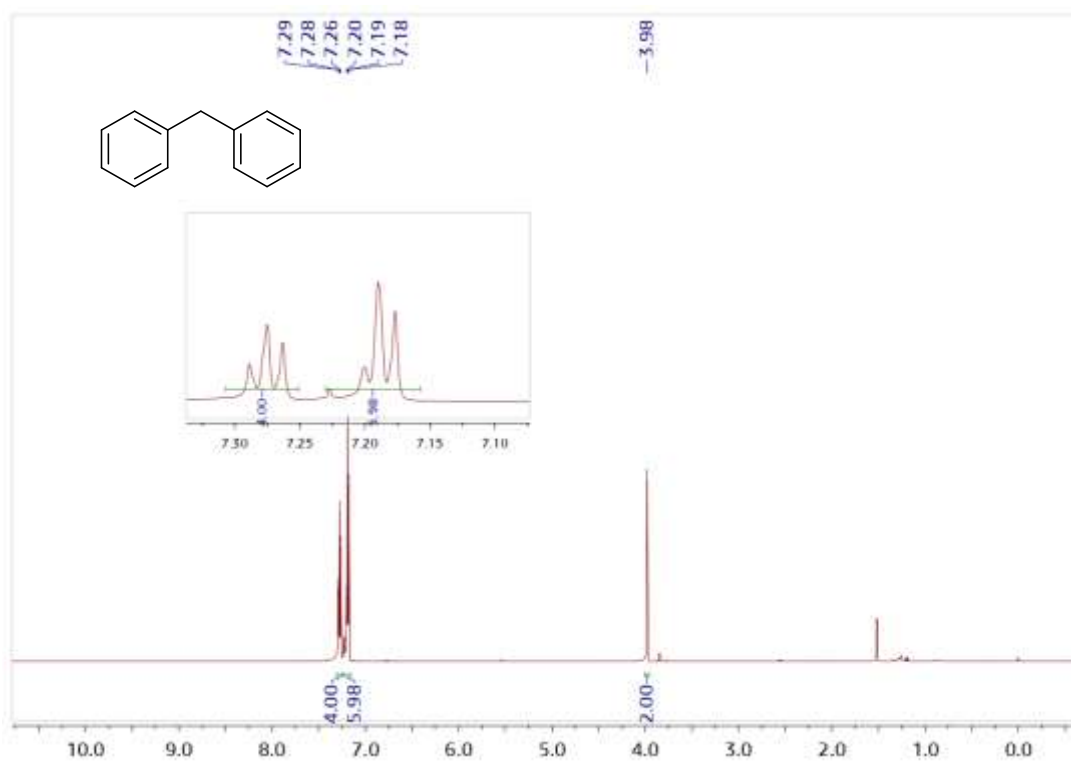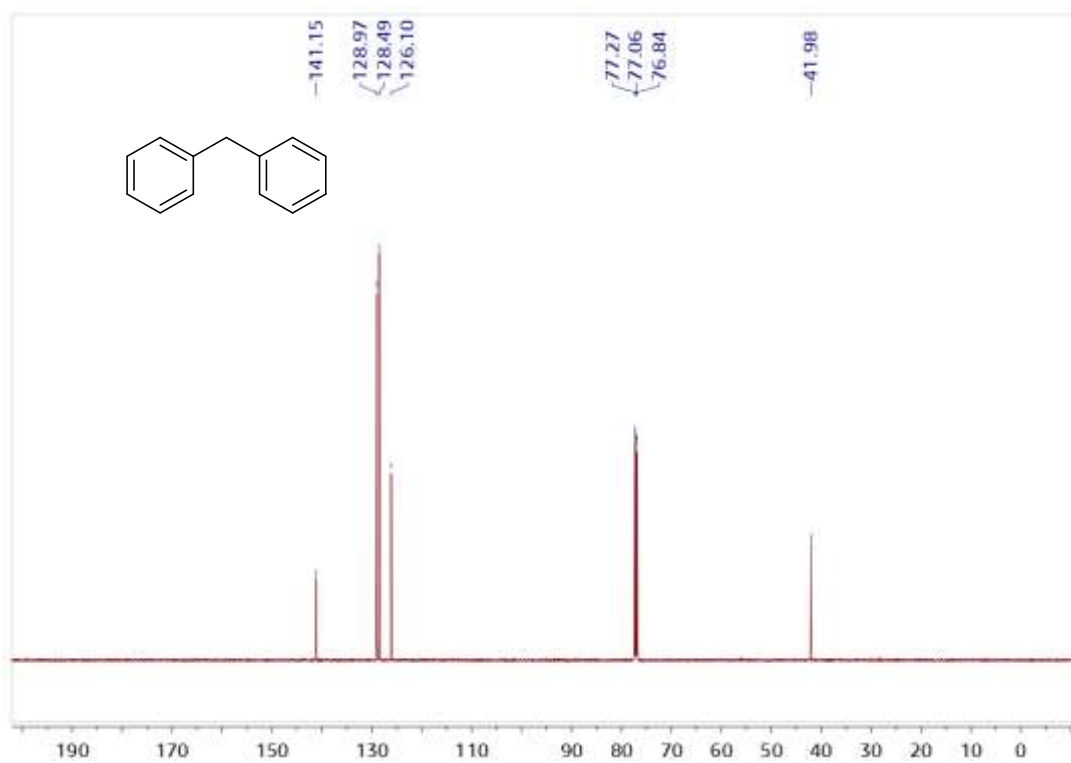

1-fluoro-4-(4-methoxybenzyl)benzene (2s)

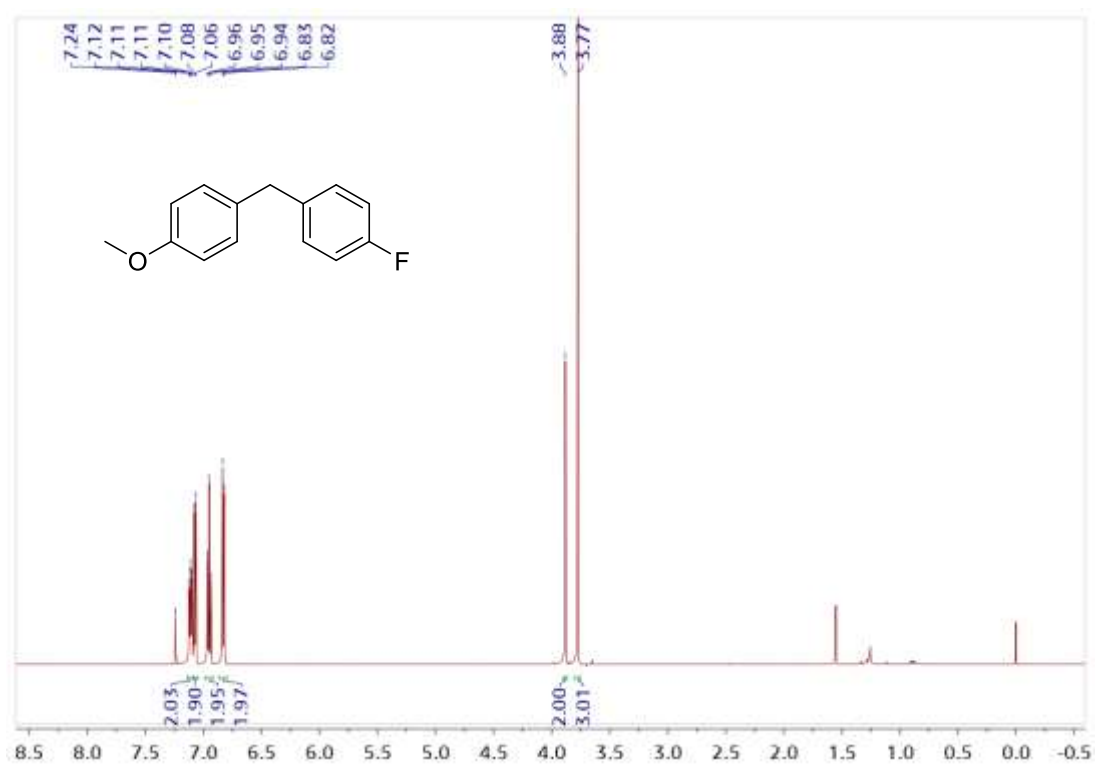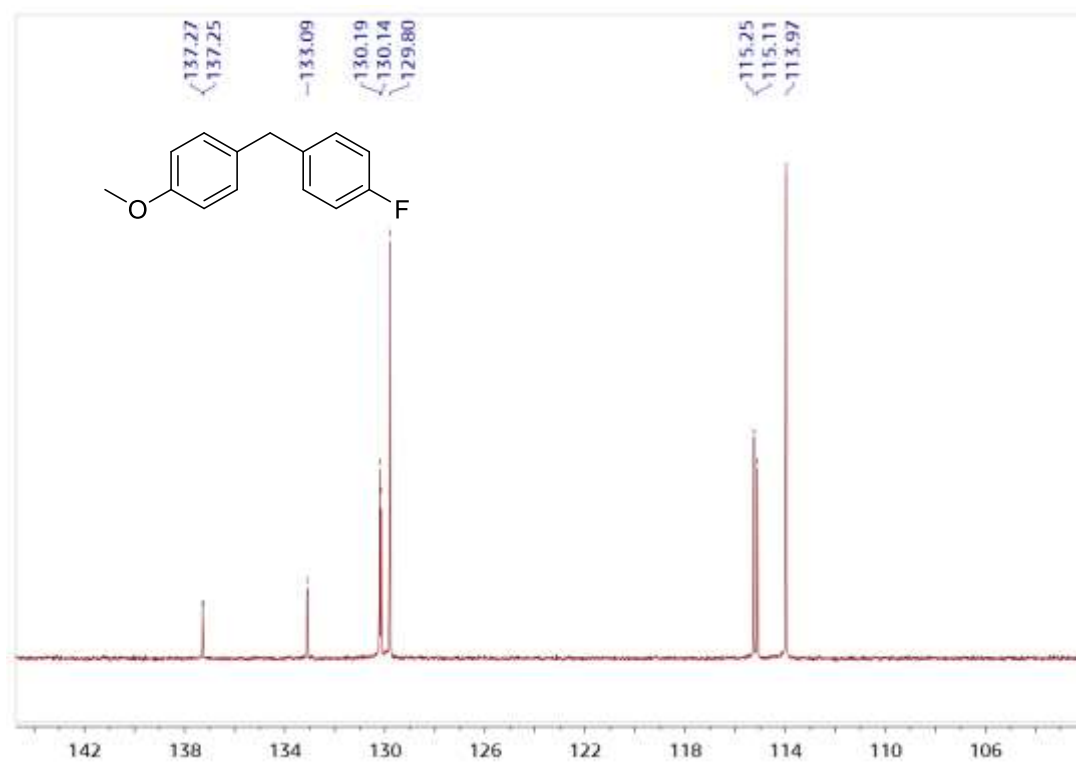



### 1-benzyl-3-bromobenzene (2t)

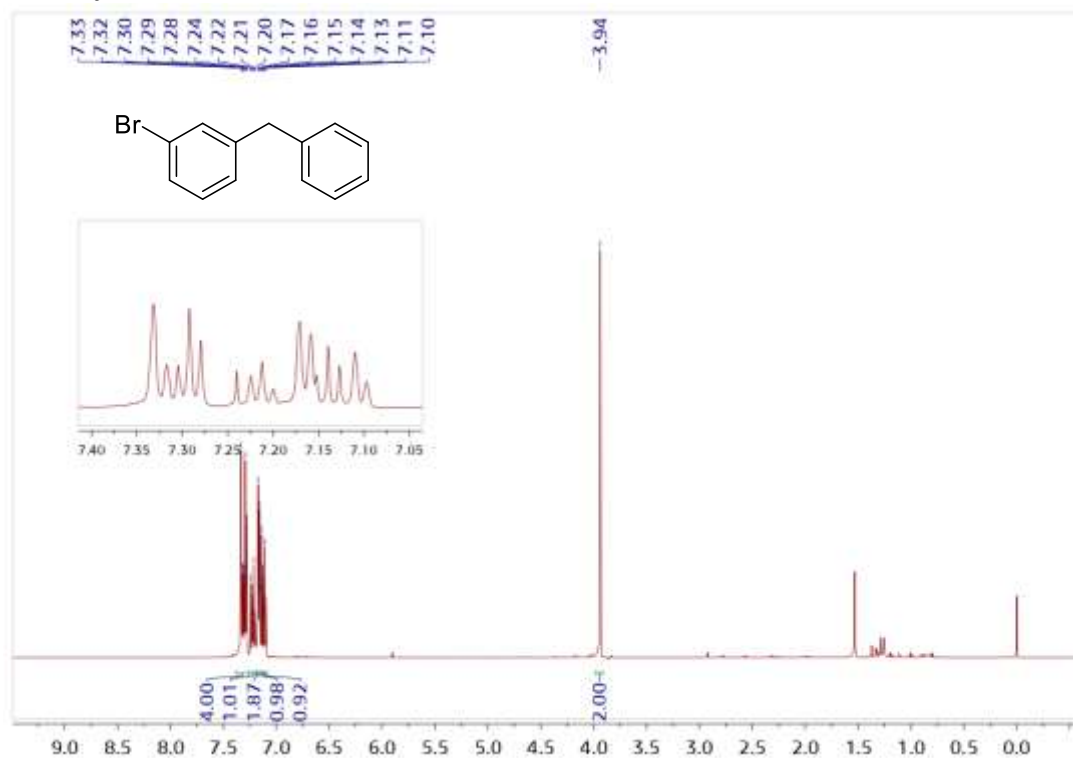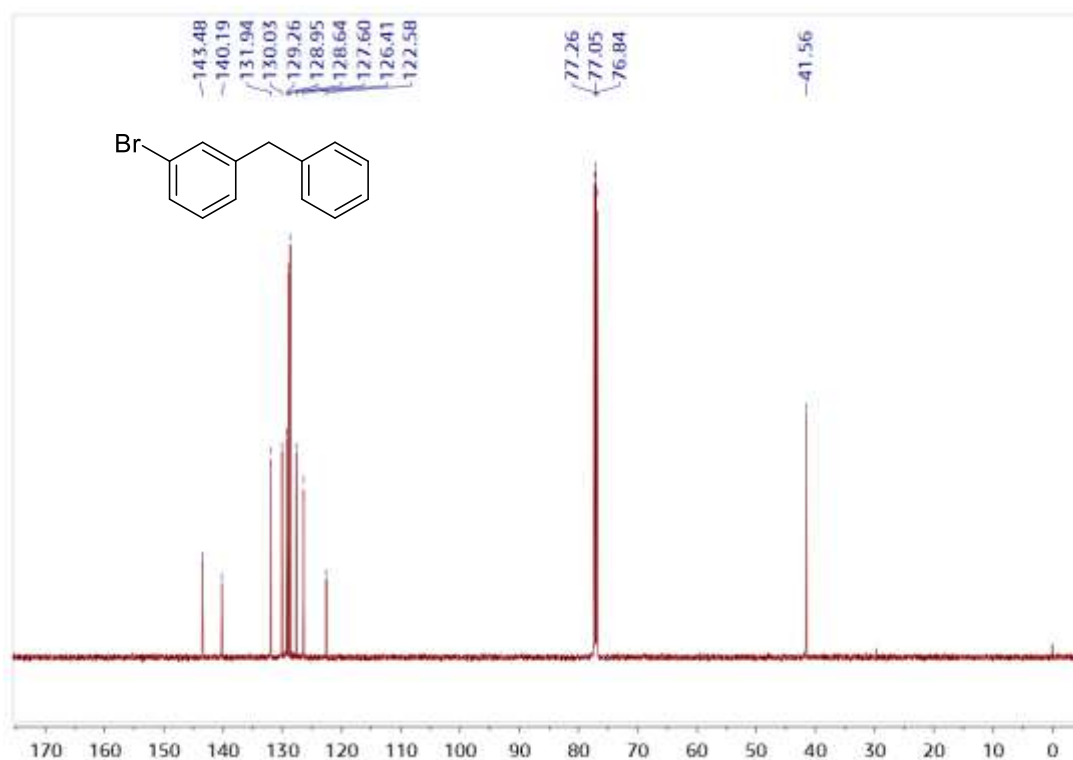

### 1-benzyl-4-chlorobenzene (2u)

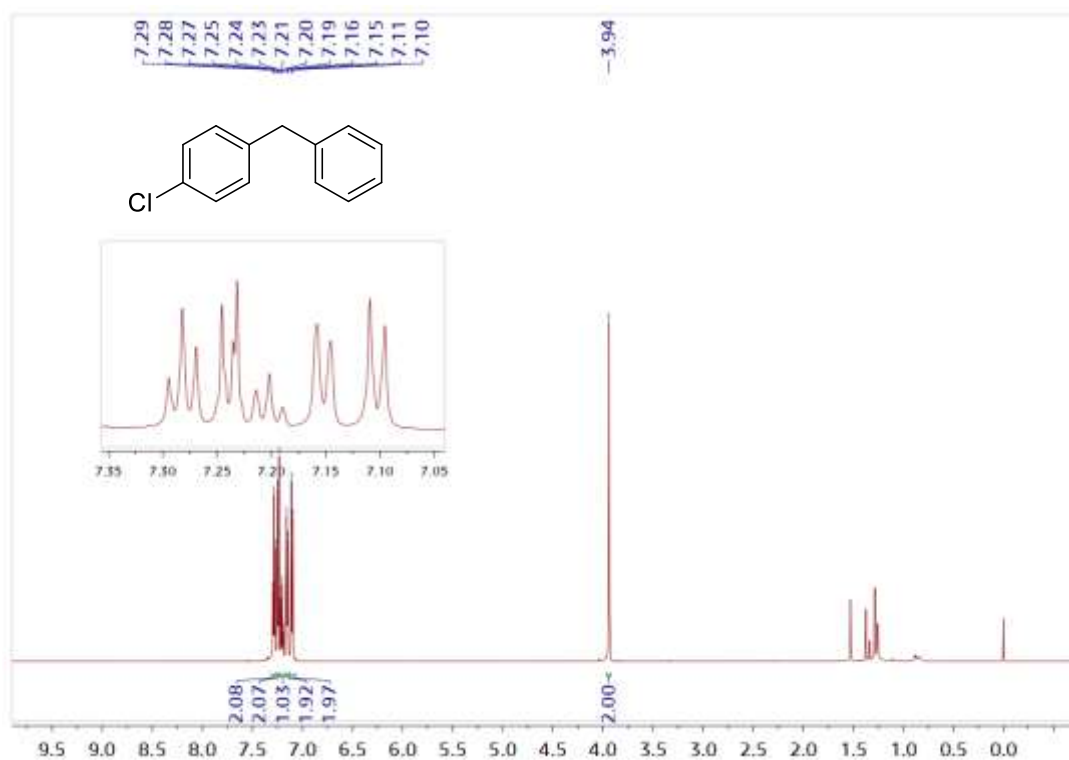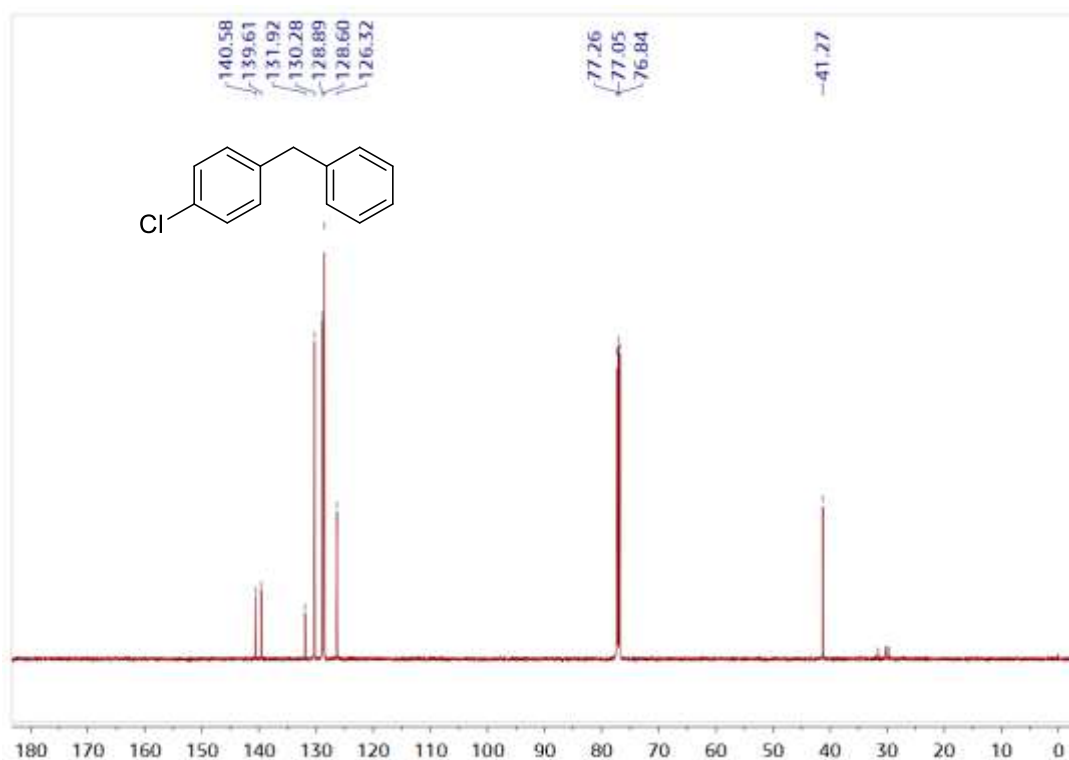

1-benzyl-4-(trifluoromethyl)benzene (2v)

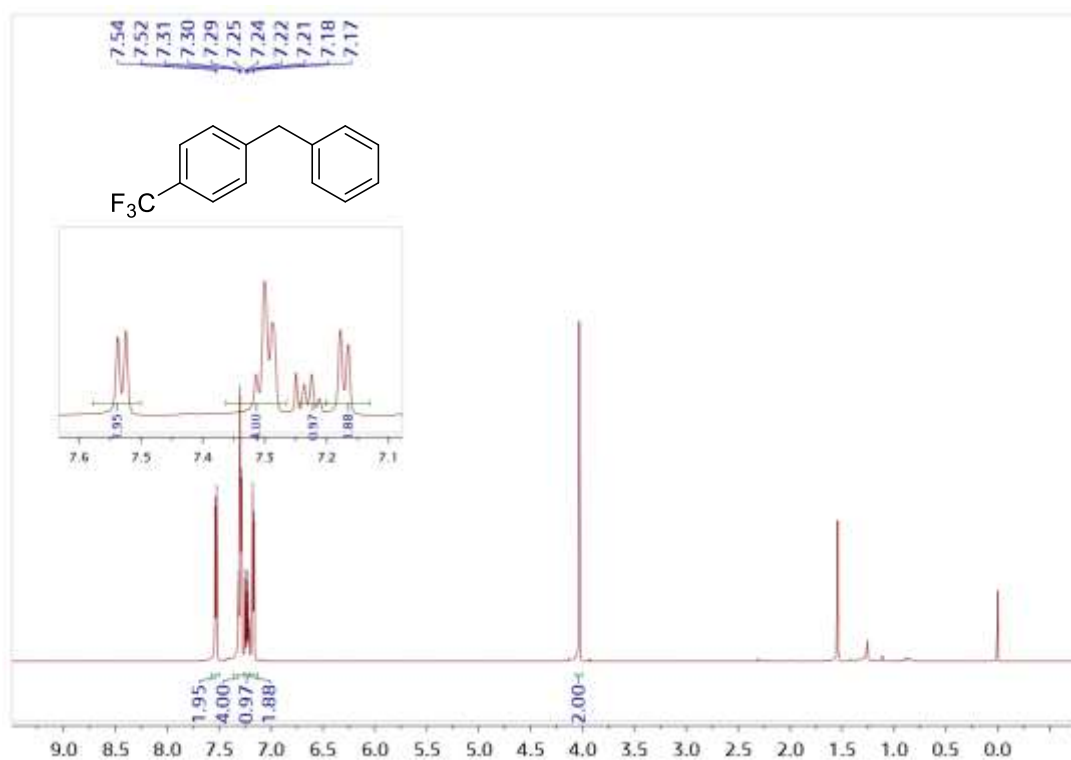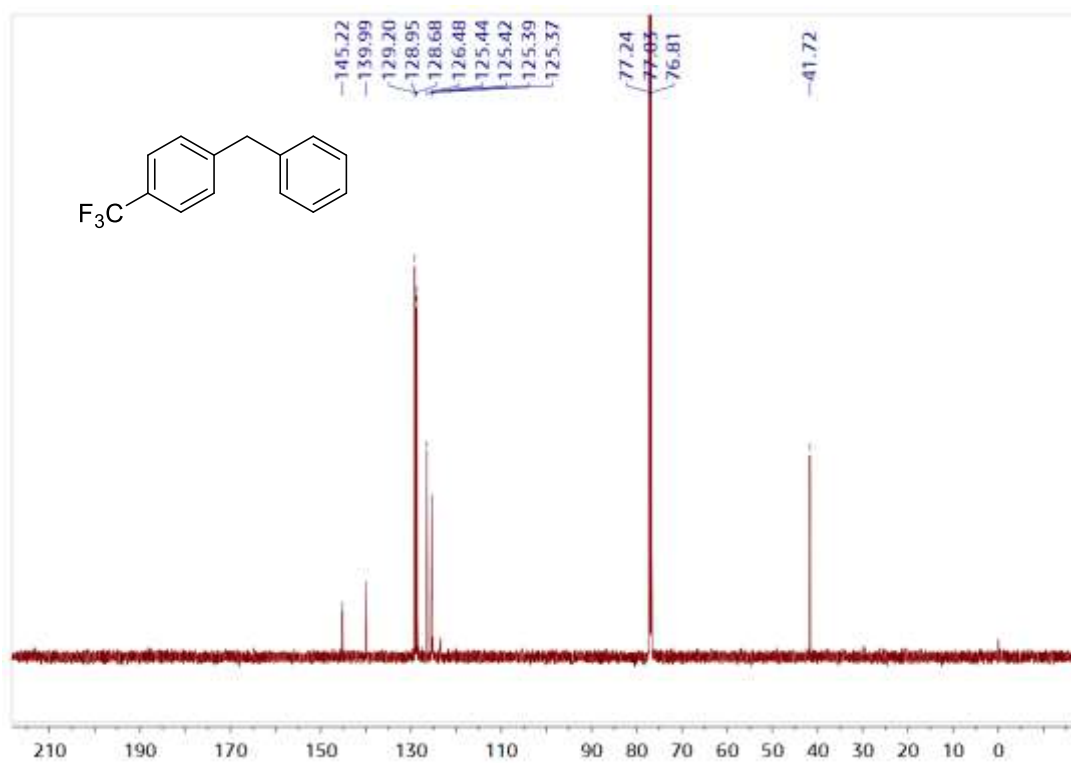

### 1-benzyl-4-nitrobenzene (2w)

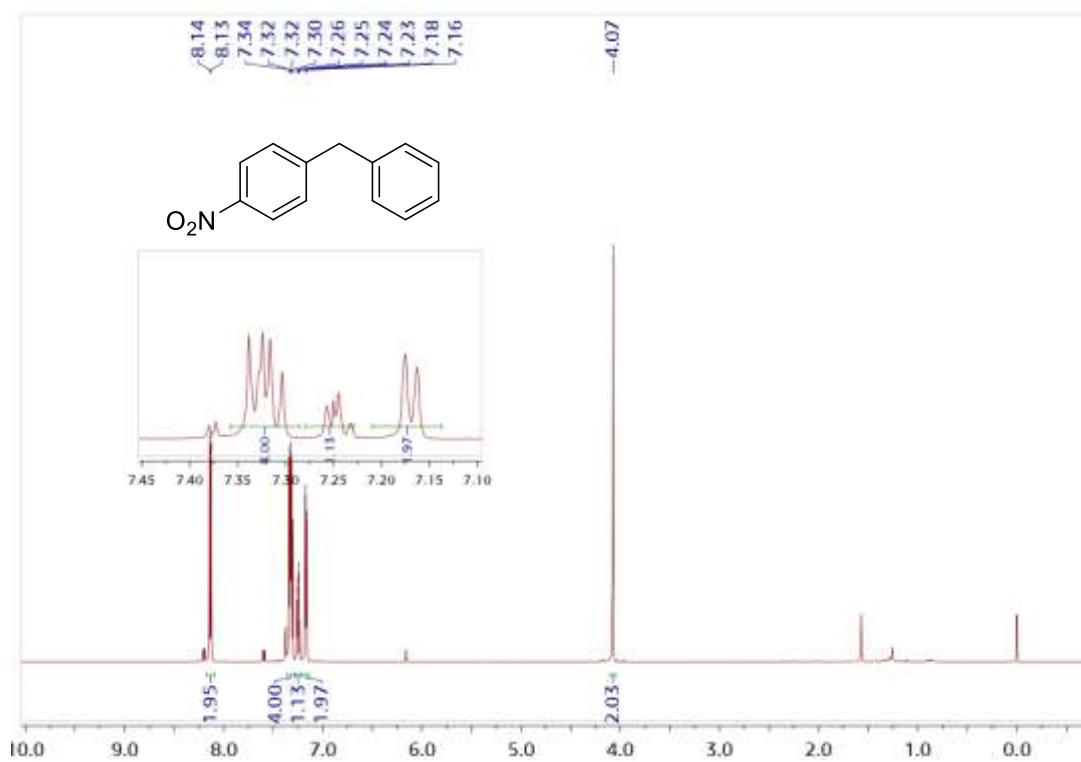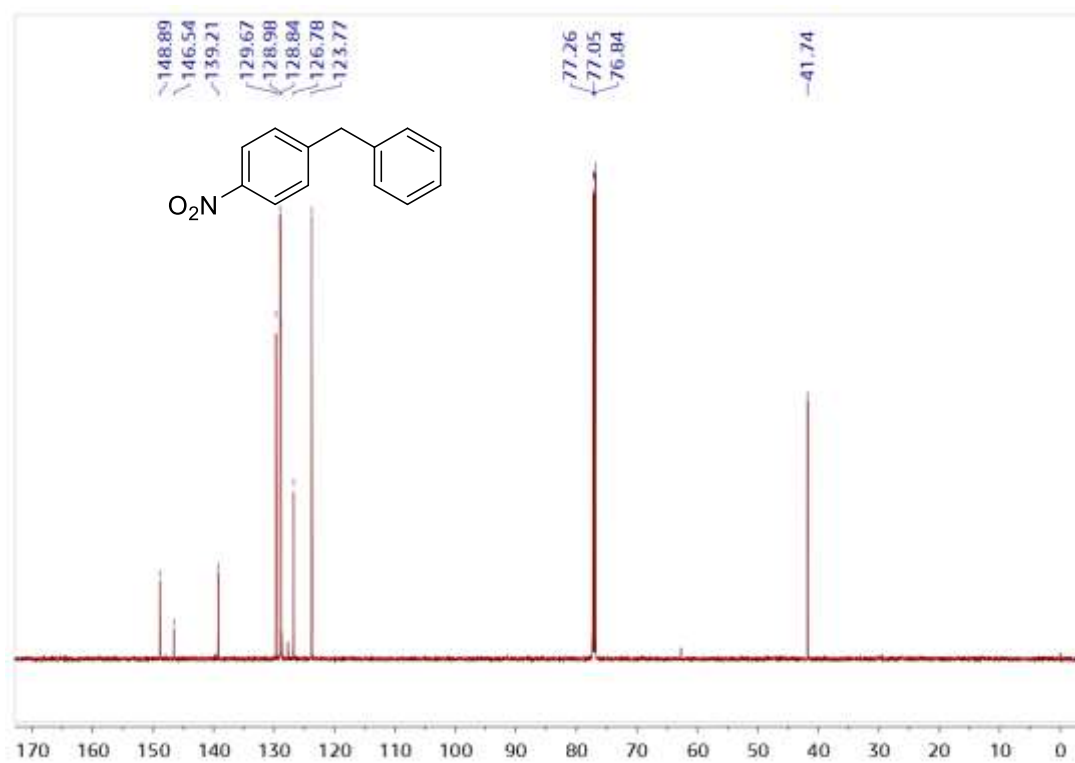

## 2-benzylthiophene (2x)

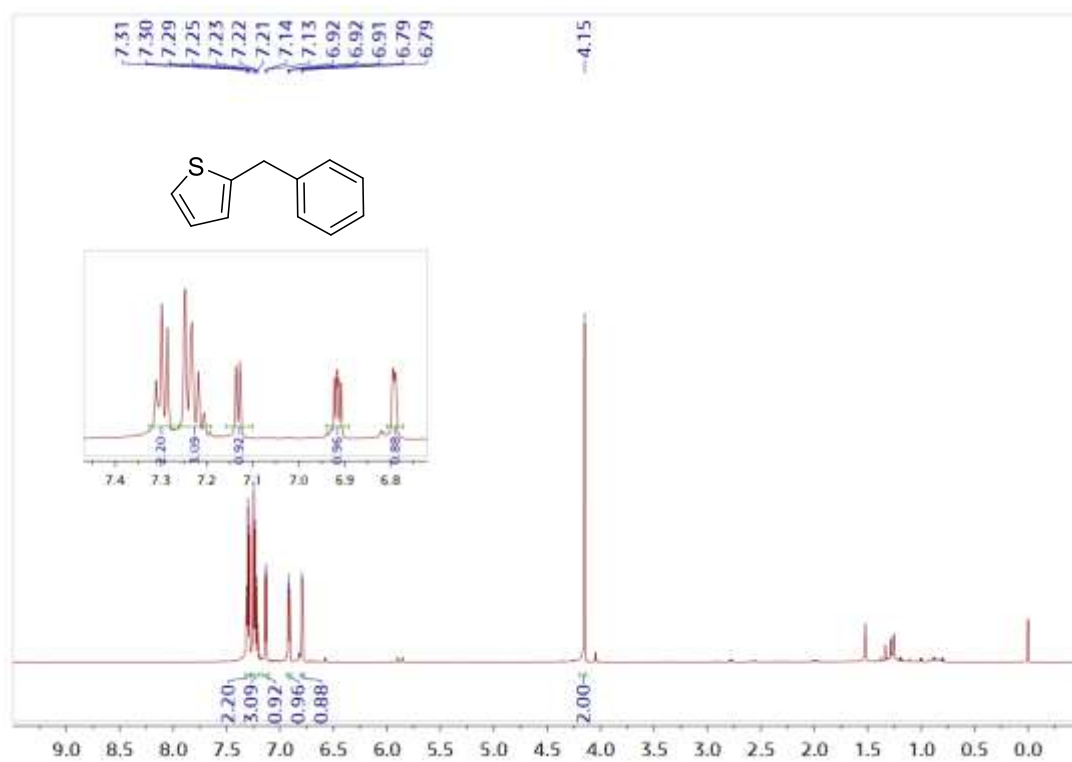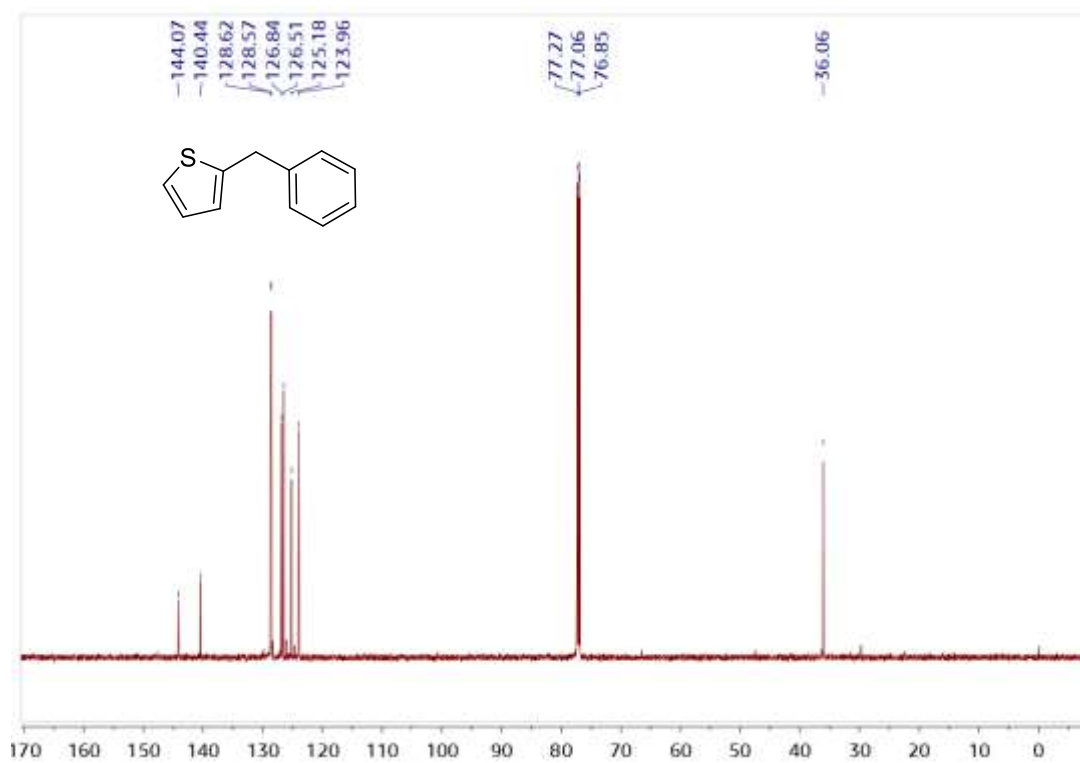

4-((2-butylbenzofuran-3-yl)methyl)-2,6-diiodophenol (2y)

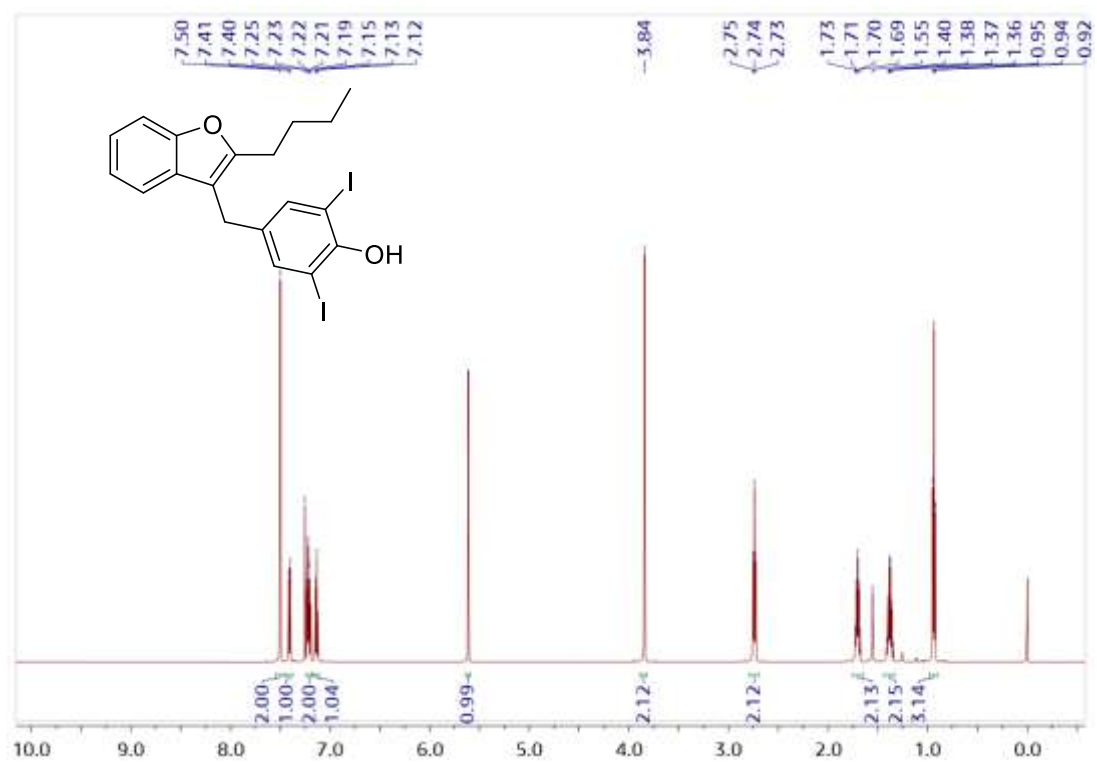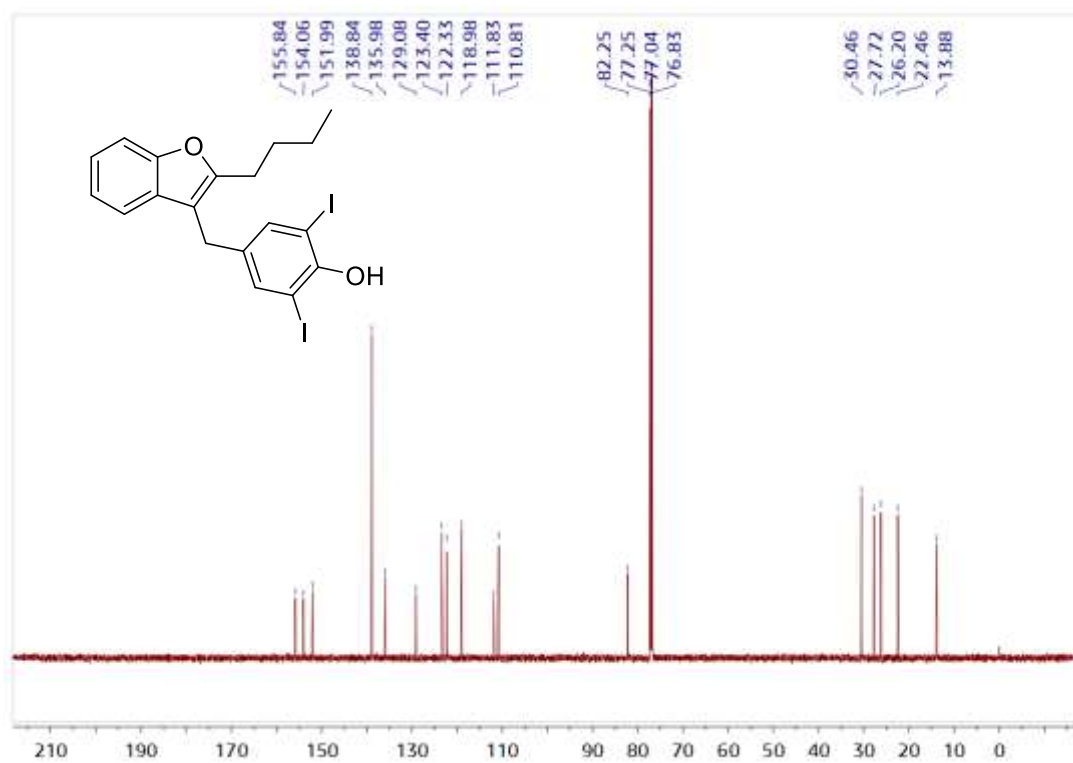

### 9H-fluorene (2z)

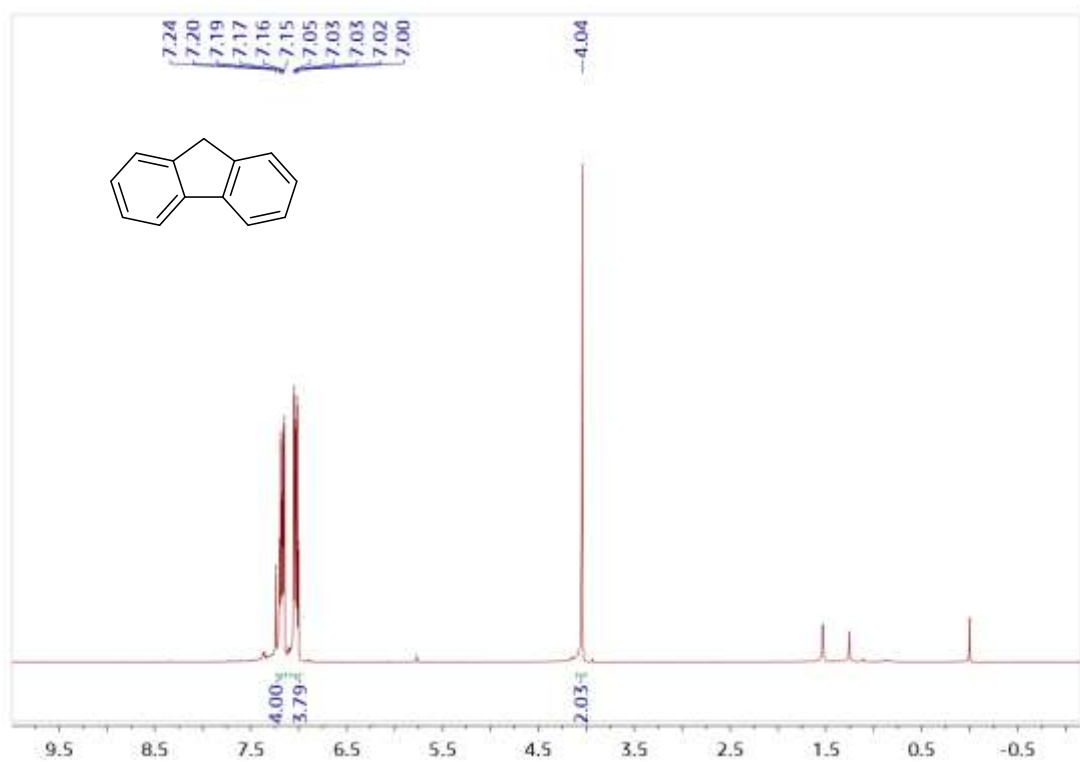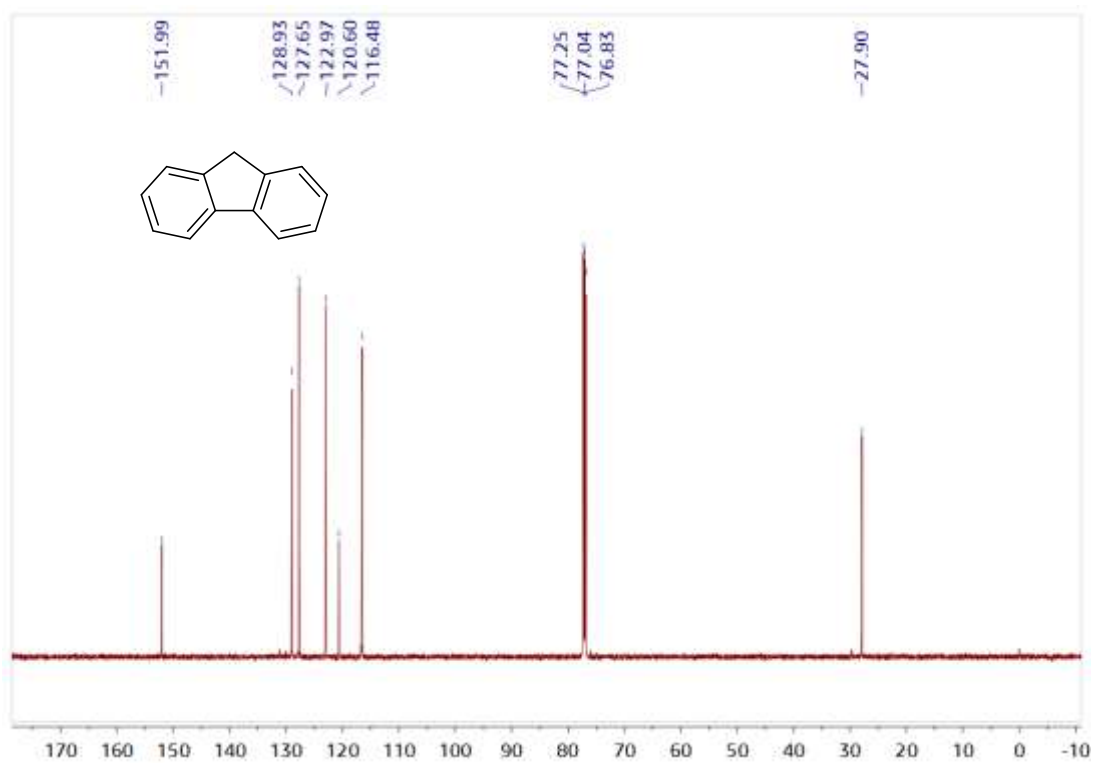

9H-thioxanthene (2aa)

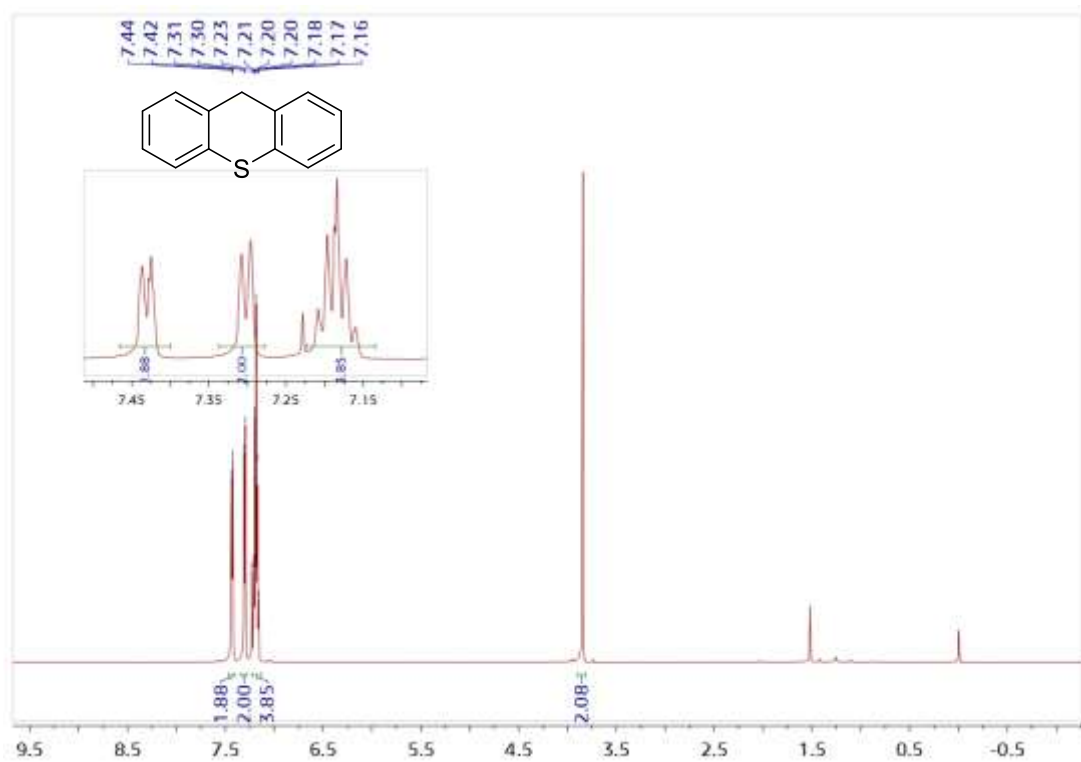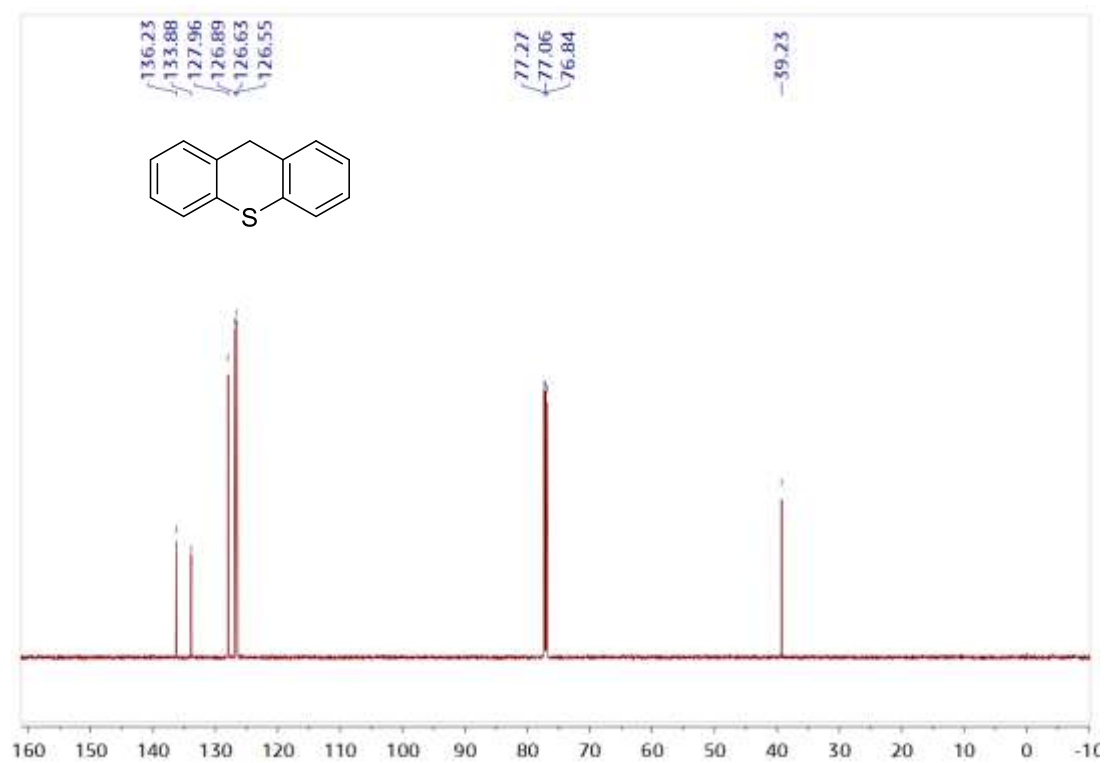



9H-xanthene (2ab)

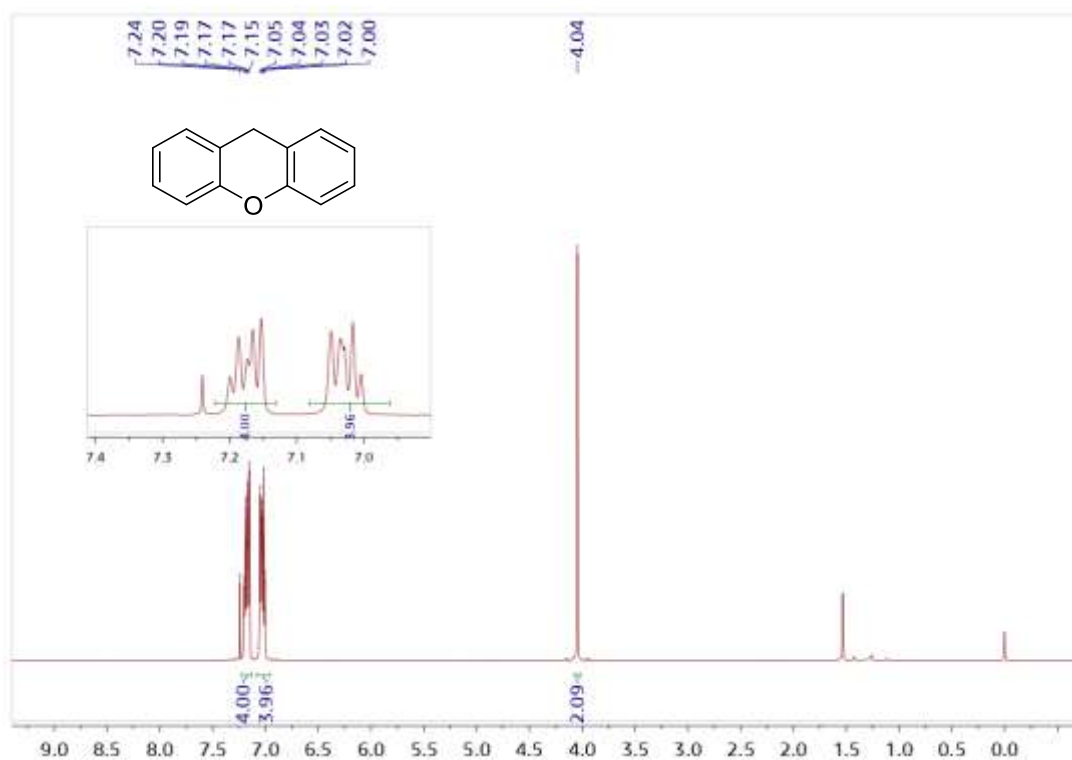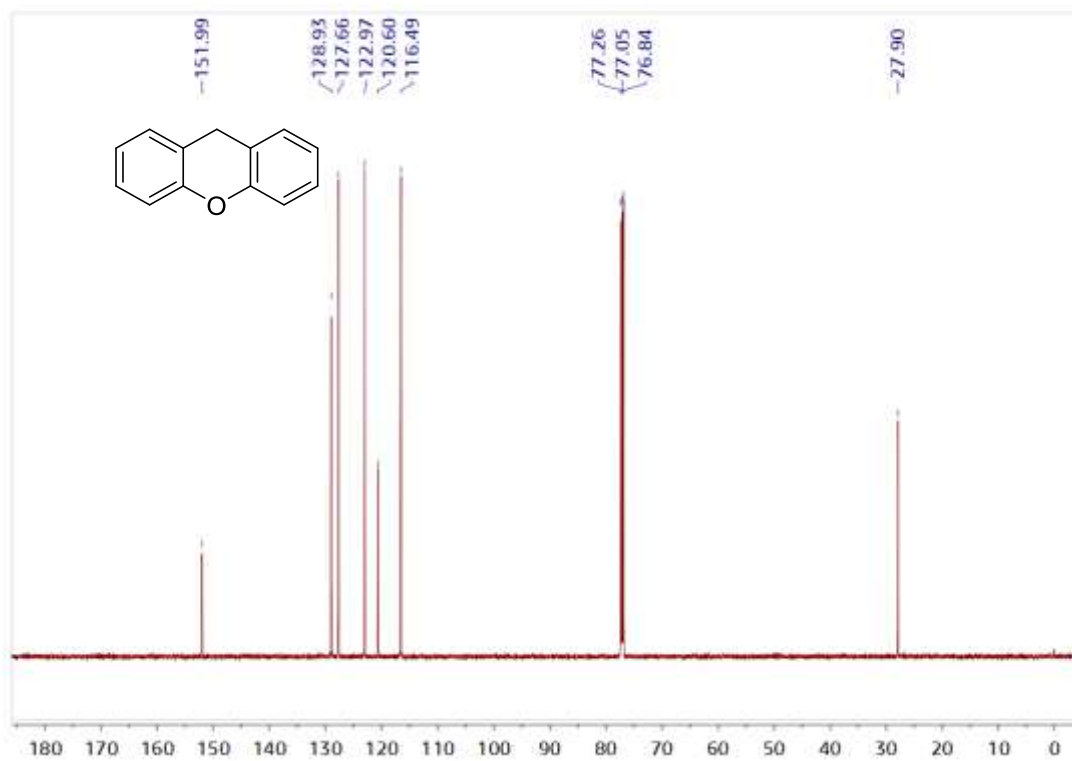

# Anthracene (2ac)

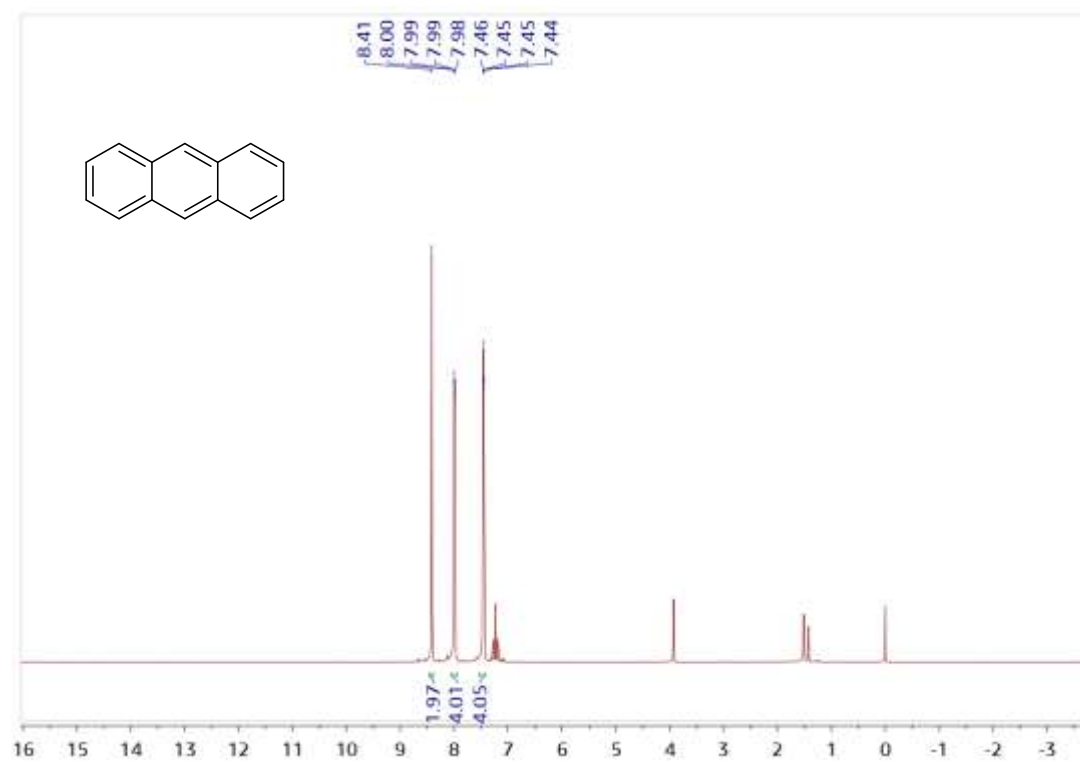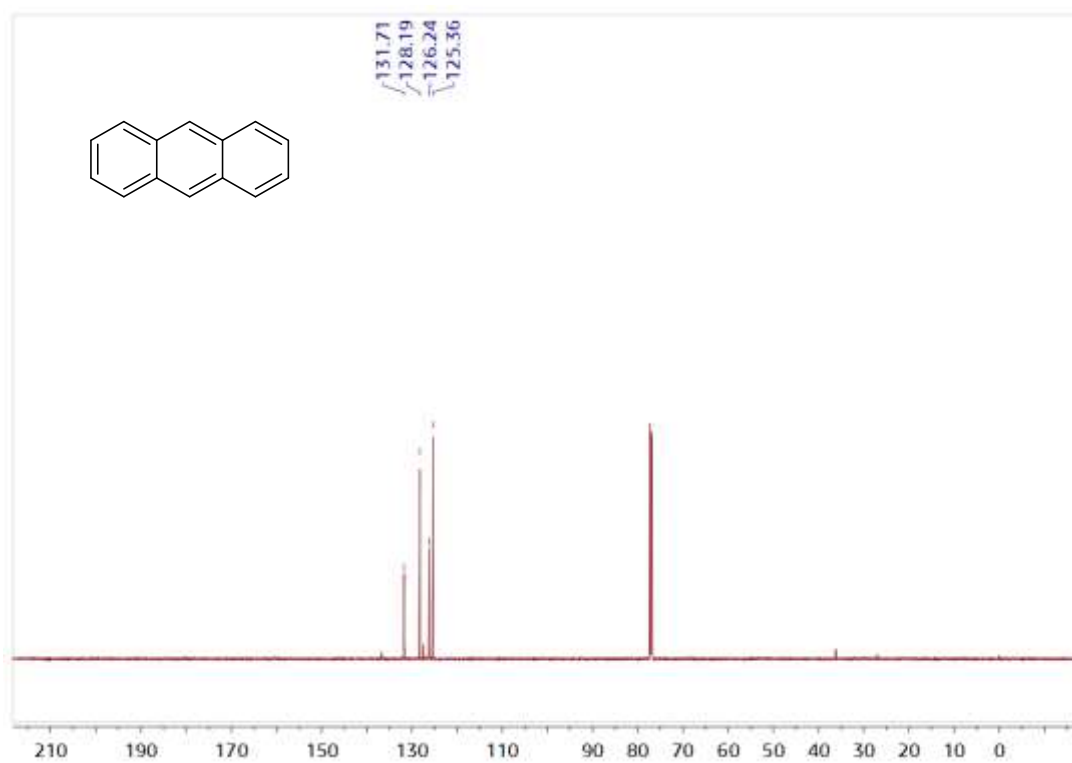

4-bromo-1-chloro-2-(4-ethoxybenzyl)benzene (2ad)

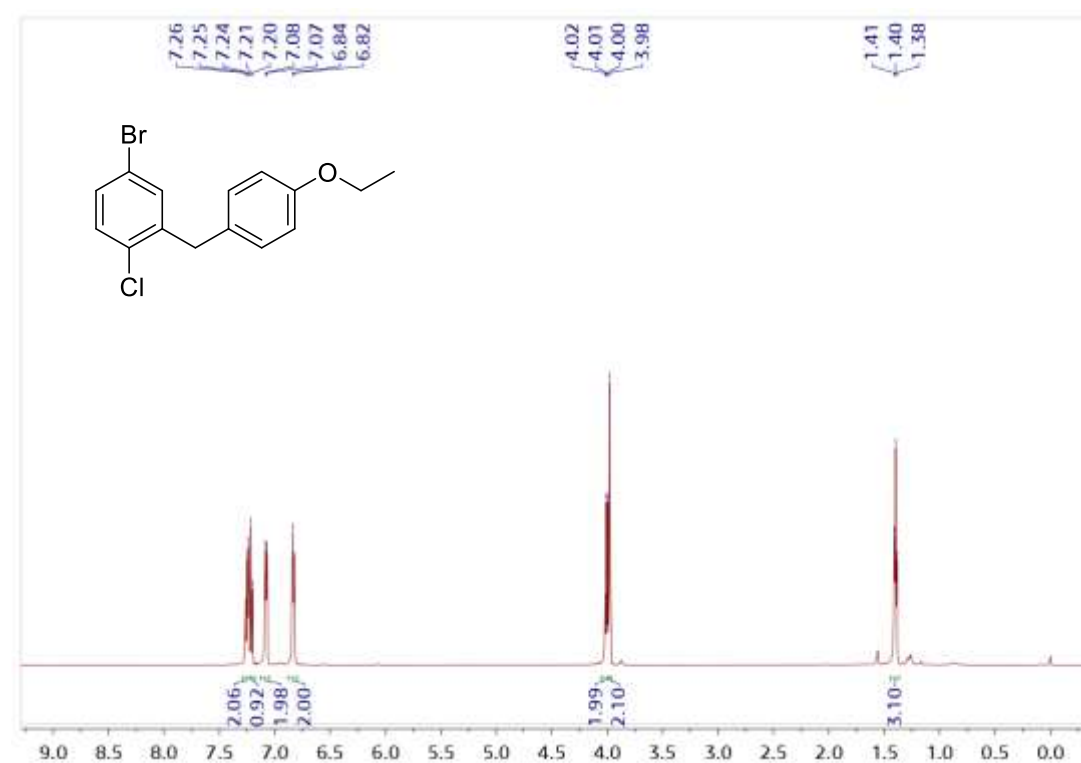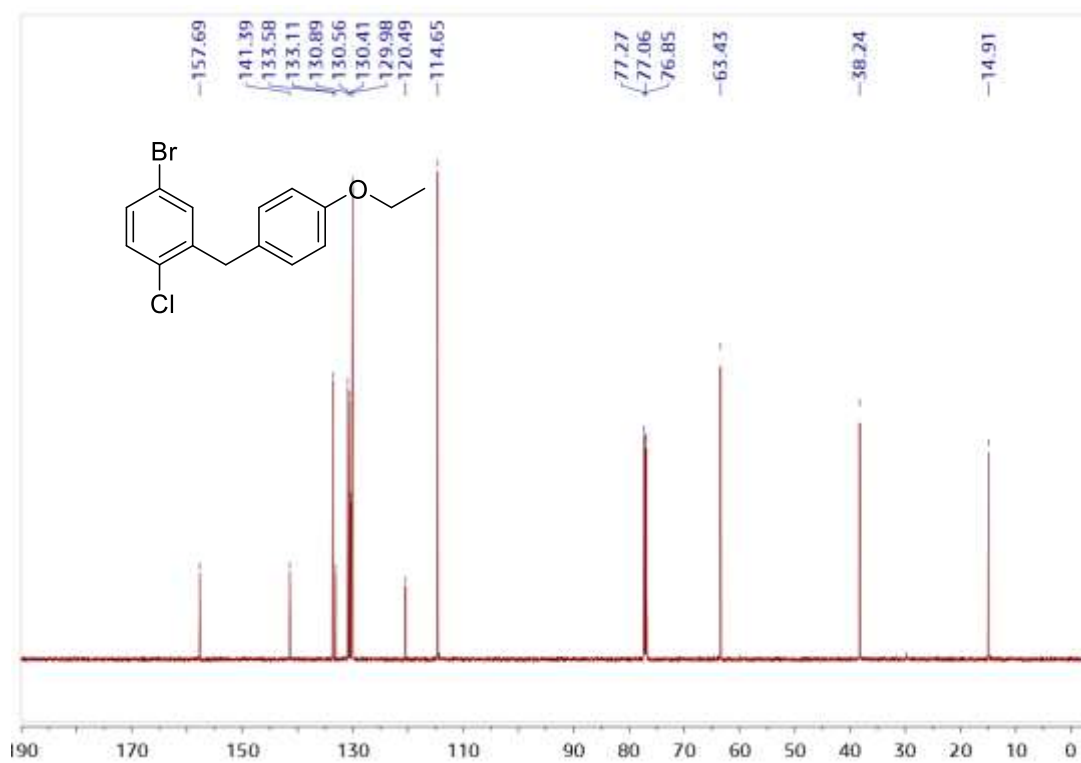

### 1-chloro-2-(4-ethoxybenzyl)-4-iodobenzene (2ae)

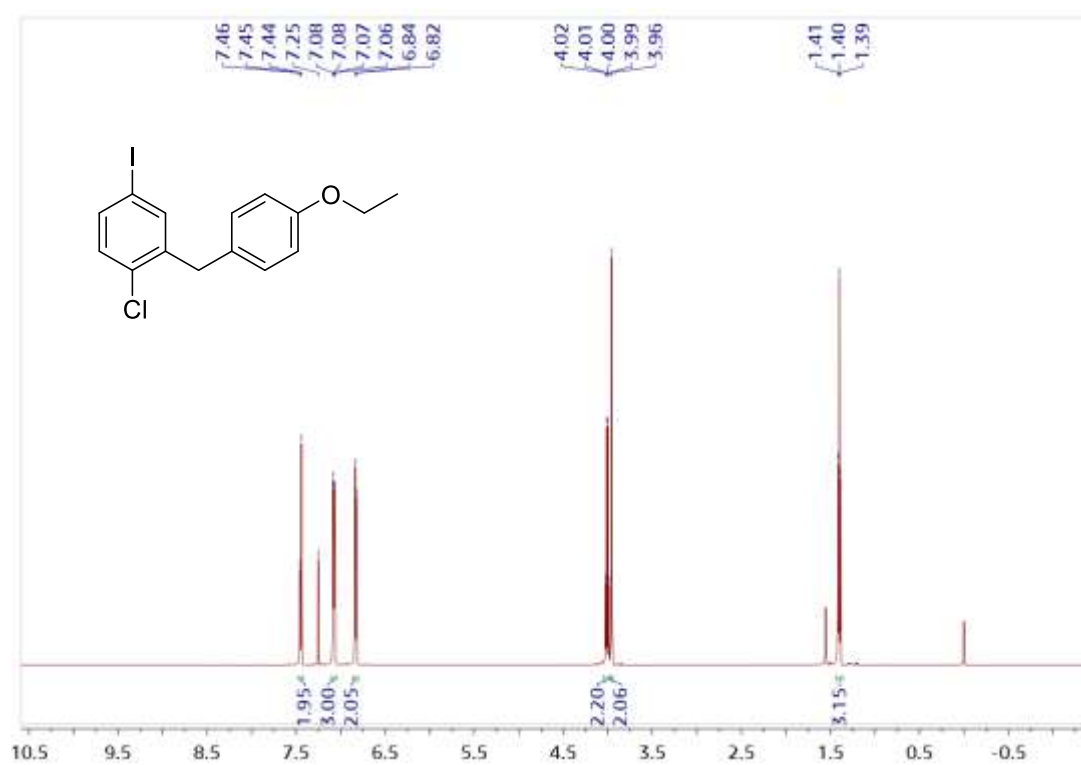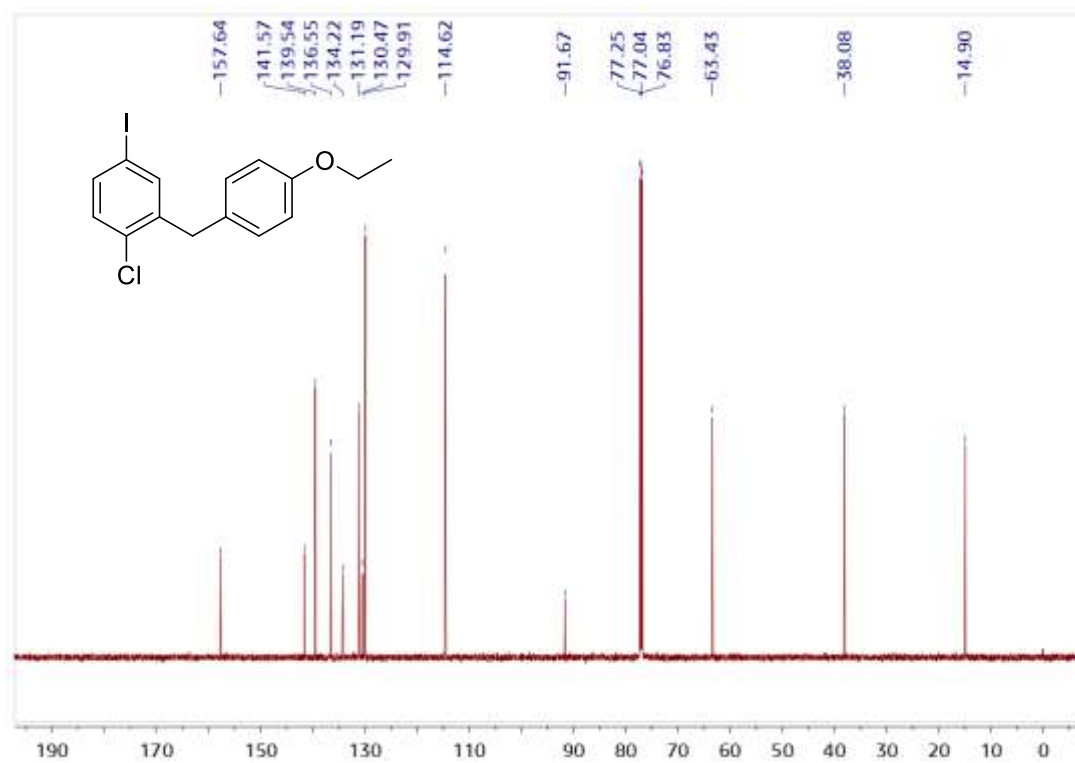

**(S)-3-(4-(2-chloro-5-iodobenzyl)phenoxy)tetrahydrofuran (2af)**

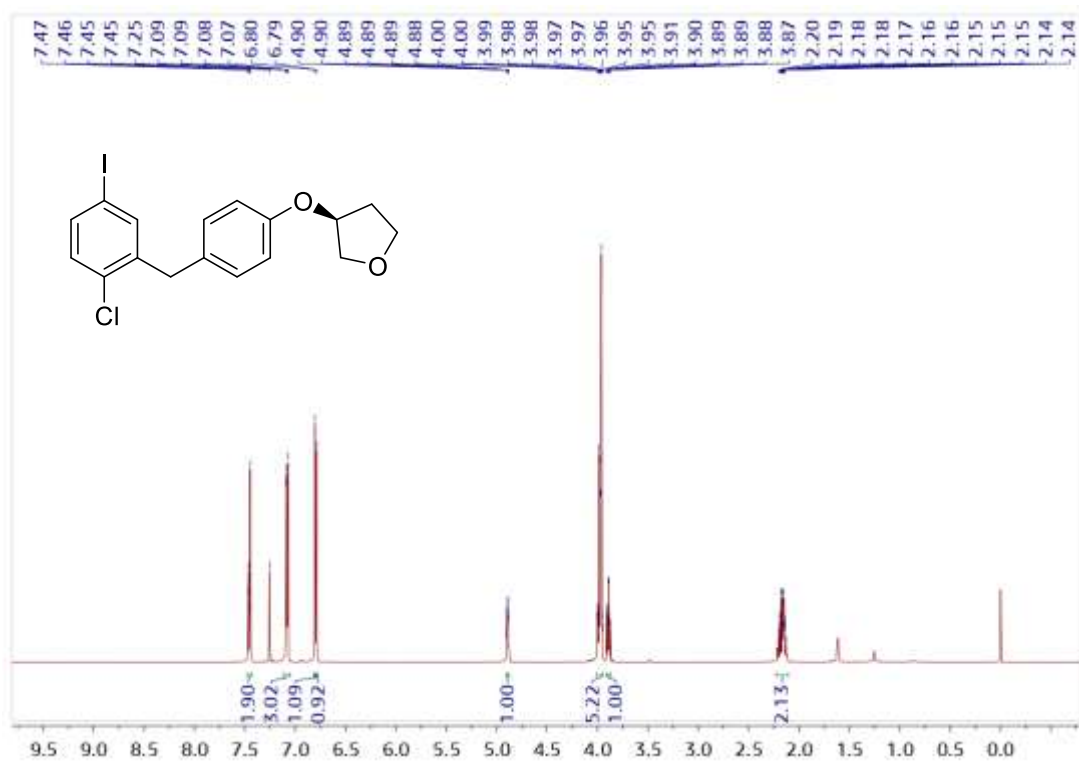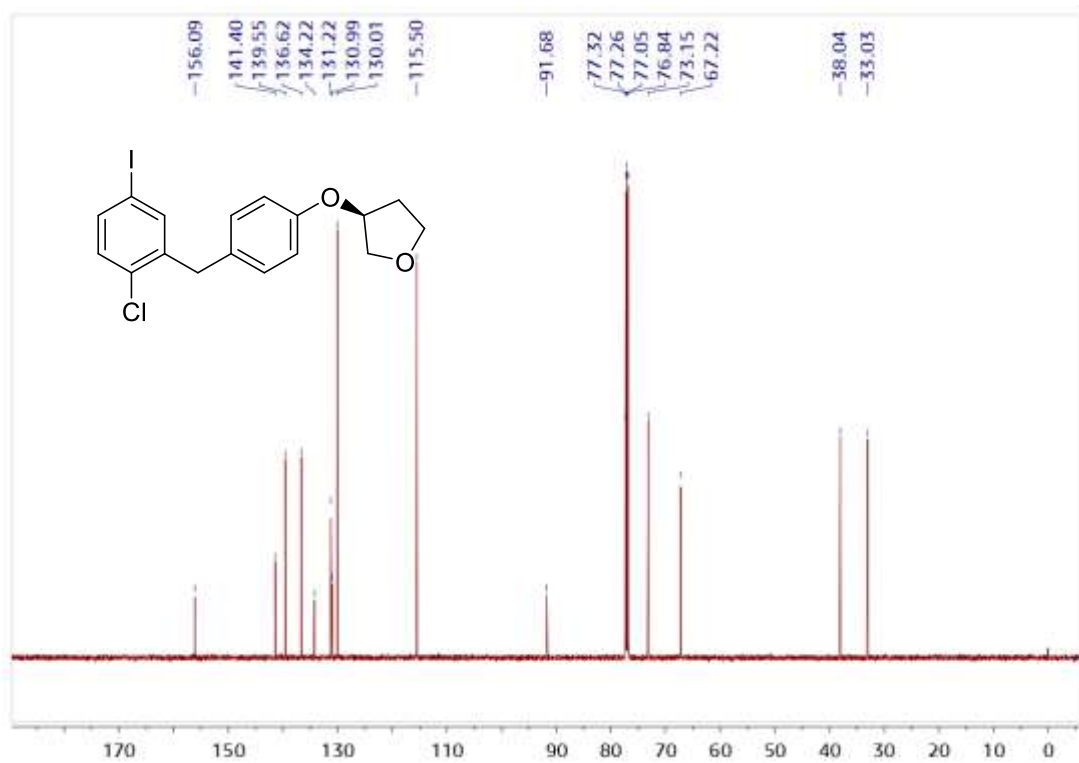

2-(5-bromo-2-fluorobenzyl)benzo[b]thiophene (2ag)

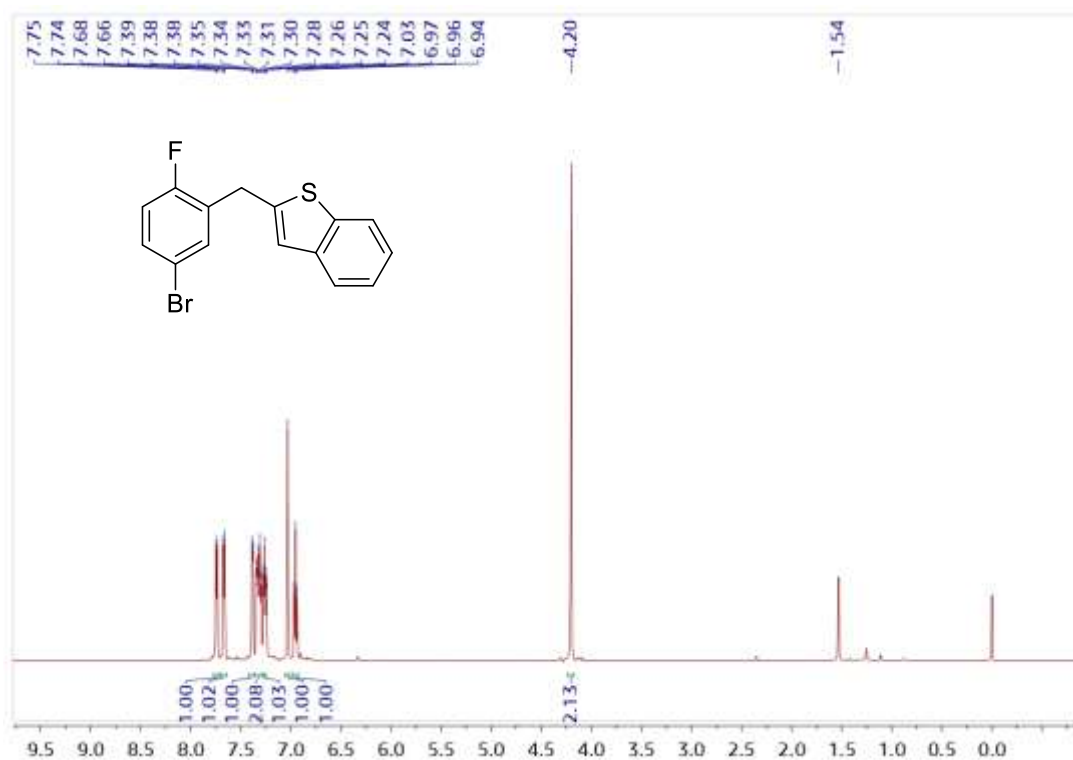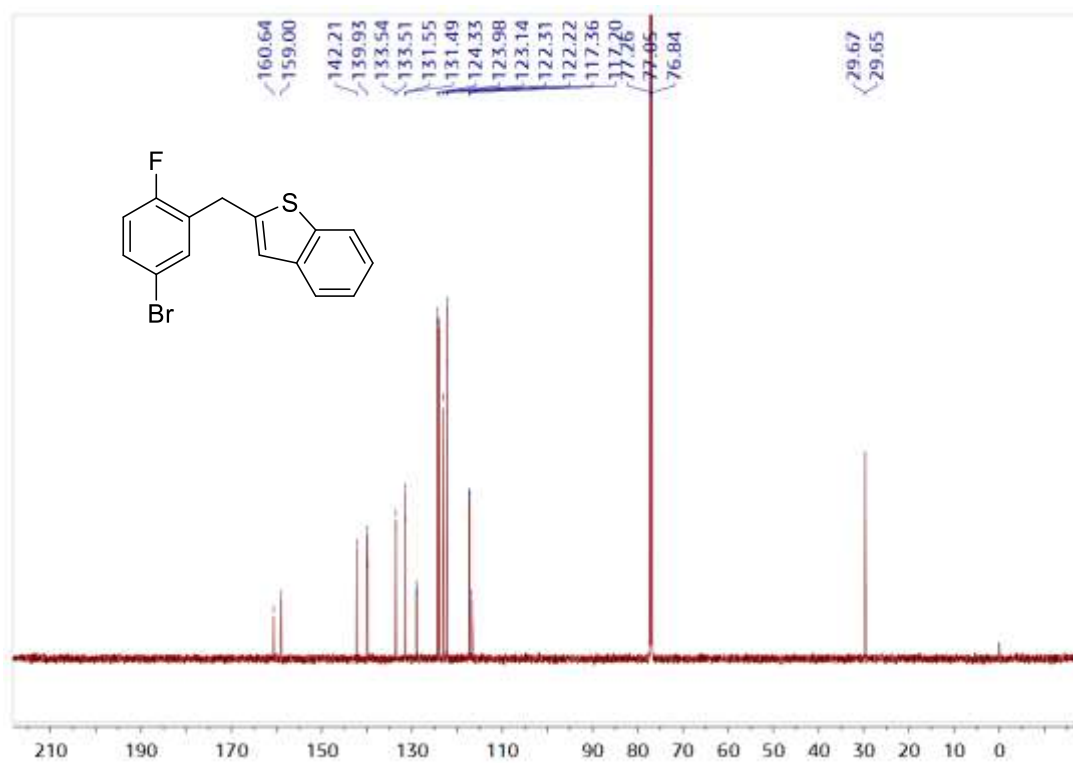

2-(5-bromo-2-methylbenzyl)-5-(4-fluorophenyl)thiophene (2ah)

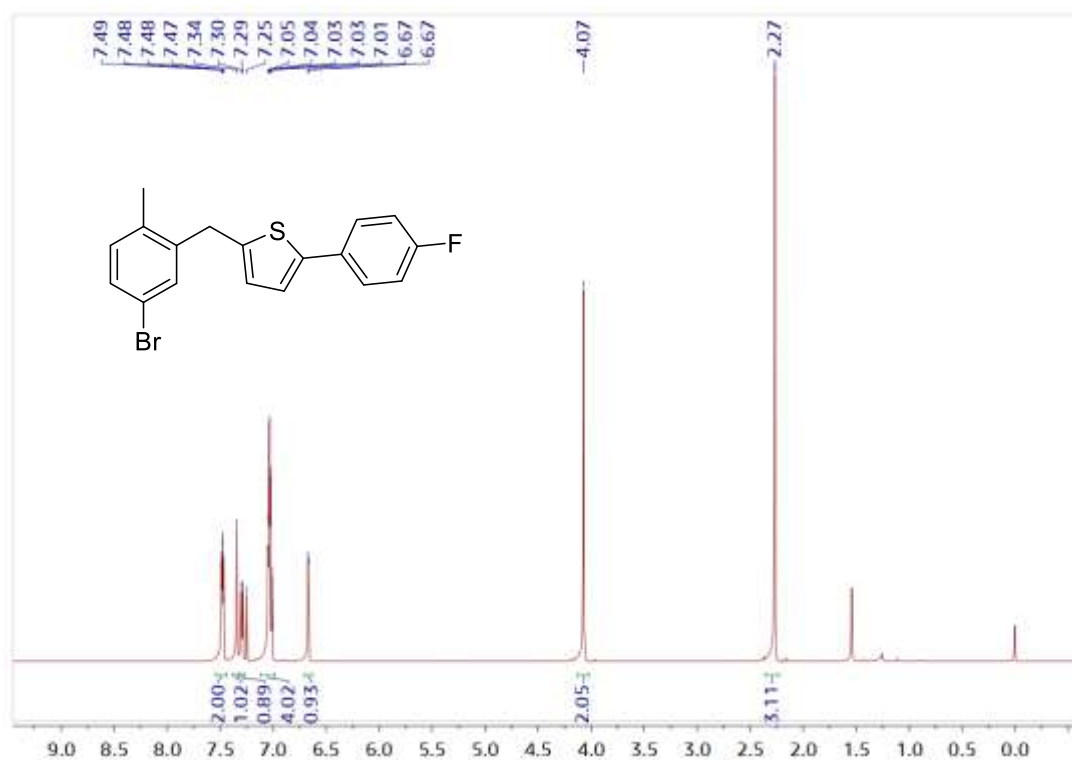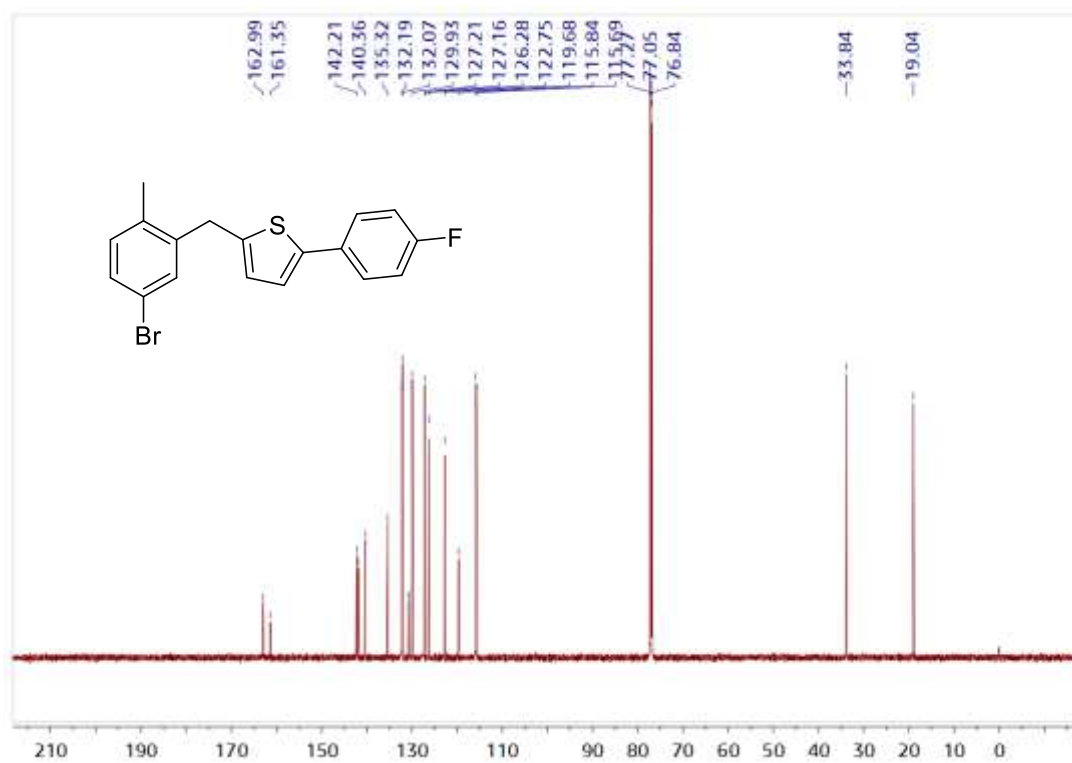

## 2-benzhydrylbenzofuran

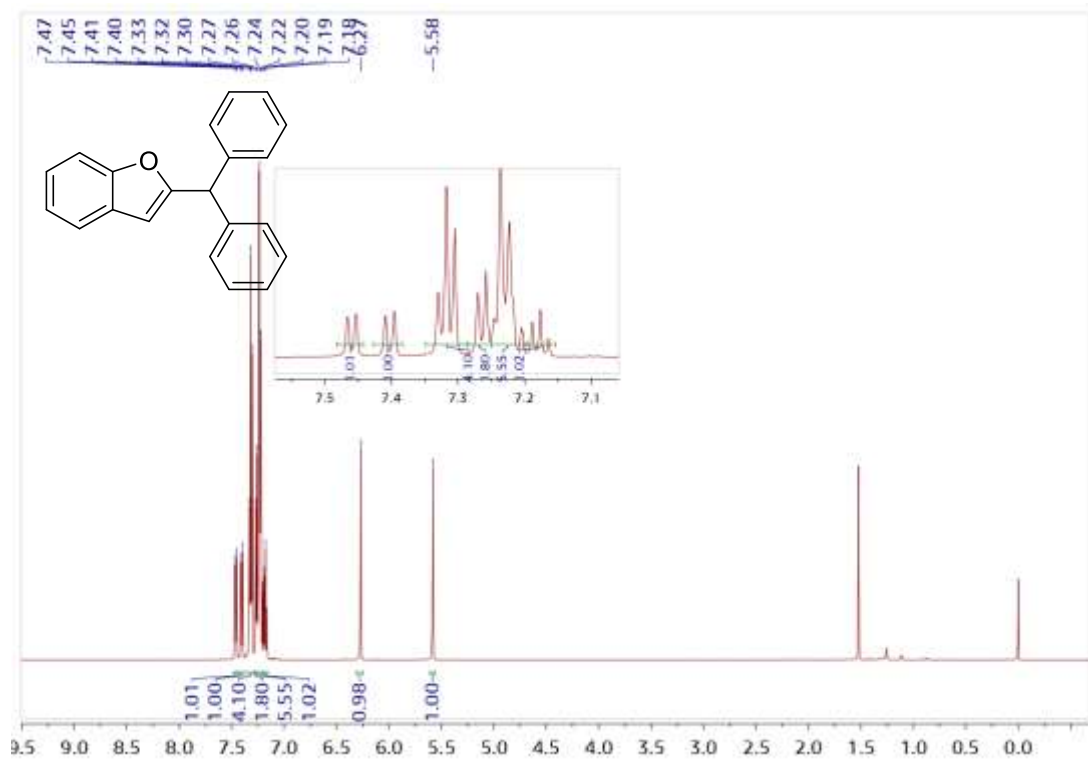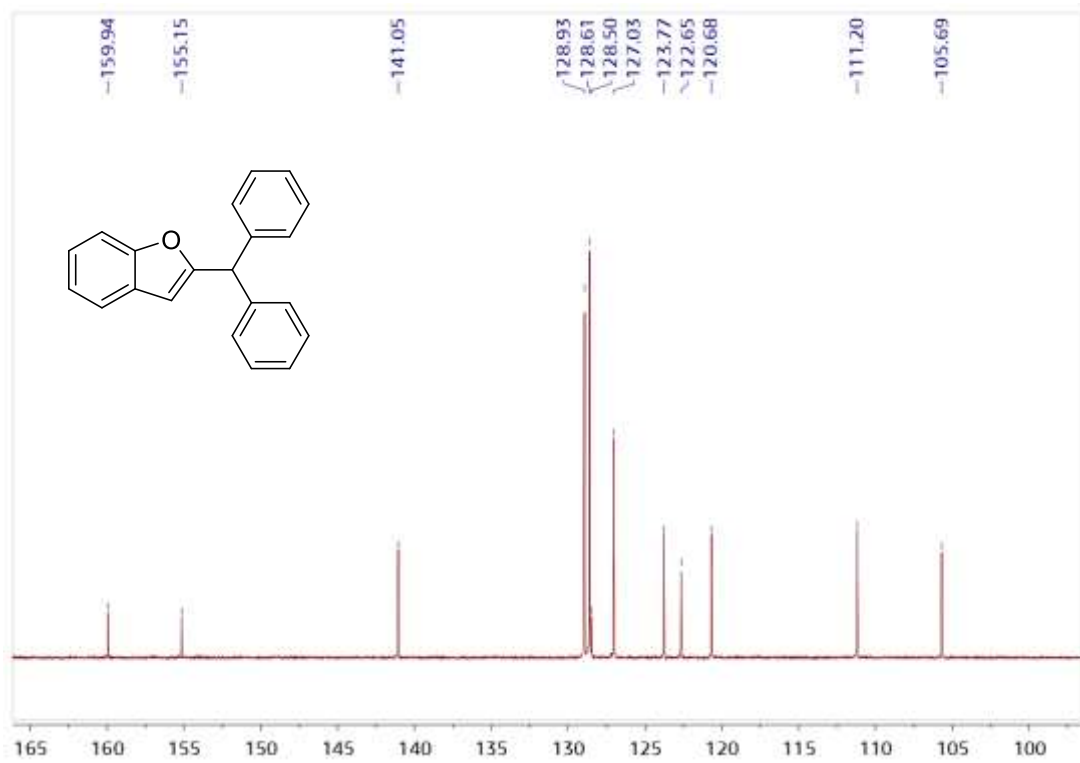



# 4-([1,1'-biphenyl]-4-yl)butan-1-ol

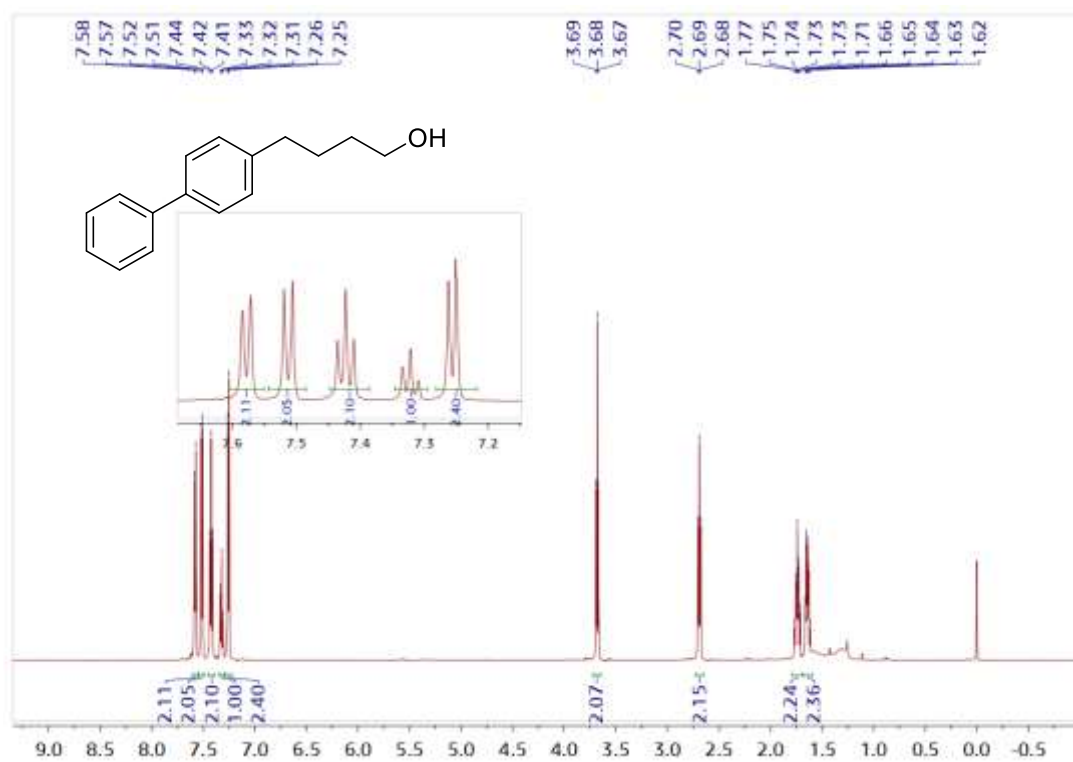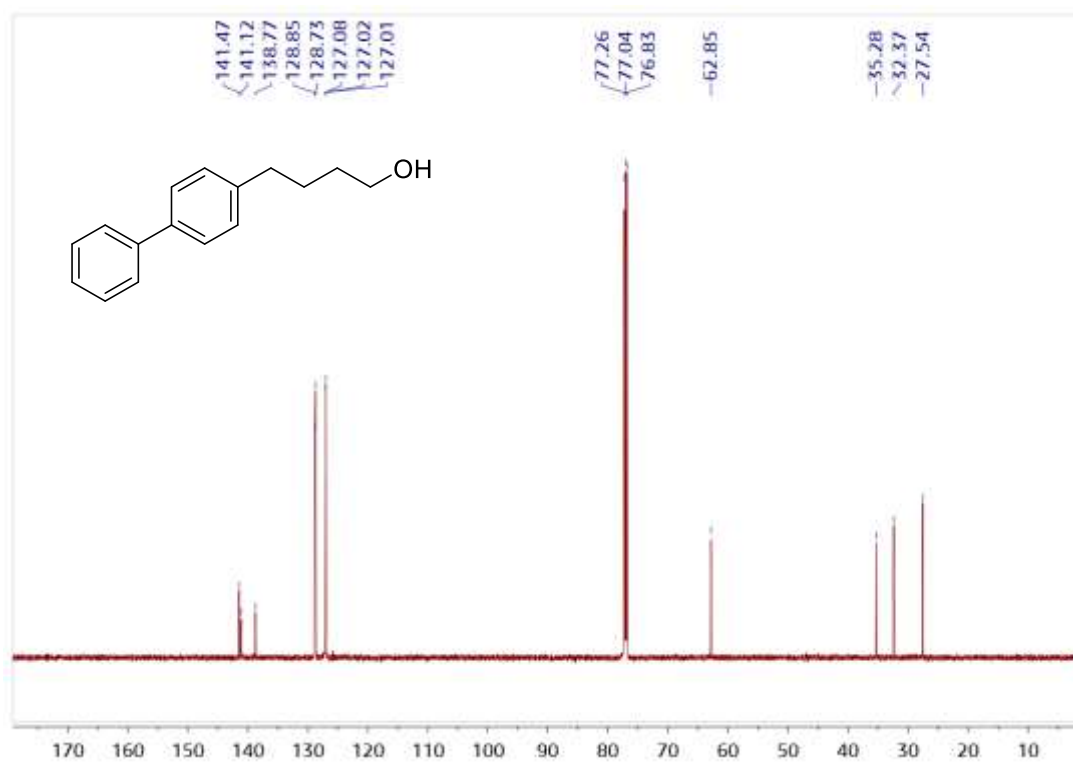

## references

1. G. Argouarch, Mild and efficient rhodium-catalyzed deoxygenation of ketones to alkanes, *New J. Chem.*, 2019, **43**, 11041-11044.
2. Z. Dong, J. Yuan, Y. Xiao, P. Mao and W. Wang, Room Temperature Chemoselective Deoxygenation of Aromatic Ketones and Aldehydes Promoted by a Tandem Pd/TiO<sub>2</sub> + FeCl<sub>3</sub> Catalyst, *The Journal of Organic Chemistry*, 2018, **83**, 11067-11073.
3. M. A. Mercadante, C. B. Kelly, C. Lee and N. E. Leadbeater, Continuous Flow Hydrogenation Using an On-Demand Gas Delivery Reactor, *Organic Process Research & Development*, 2012, **16**, 1064-1068.
4. A. Volkov, K. P. J. Gustafson, C. W. Tai, O. Verho, J. E. Bäckvall and H. Adolfsson, Mild Deoxygenation of Aromatic Ketones and Aldehydes over Pd/C Using Polymethylhydrosiloxane as the Reducing Agent, *Angew. Chem. Int. Ed.*, 2015, **54**, 5122-5126.
5. E. Vitaku and J. T. Njardarson, A Mild meta - Selective C - H Alkylation of Catechol Mono - Ethers, *European Journal of Organic Chemistry*, 2016, **2016**, 3679-3683.
6. T. N. Gieshoff, U. Chakraborty, M. Villa and A. Jacobi von Wangelin, Alkene Hydrogenations by Soluble Iron Nanocluster Catalysts, *Angew. Chem. Int. Ed.*, 2017, **56**, 3585-3589.
7. J. Tang, L. Lv, X.-J. Dai, C.-C. Li, L. Li and C.-J. Li, Nickel-catalyzed cross-coupling of aldehydes with aryl halides via hydrazone intermediates, *Chem. Commun.*, 2018, **54**, 1750-1753.
8. Q. Ai, S. Pang and K. H. Ahn, Photoswitchable “Turn - on” Fluorescence Diarylethenes: Substituent Effects on Photochemical Properties and Electrochromism, *Chemistry - A European Journal*, 2015, **22**, 656-662.
9. N. Kalutharage and C. S. Yi, Scope and Mechanistic Analysis for Chemoselective Hydrogenolysis of Carbonyl Compounds Catalyzed by a Cationic Ruthenium Hydride Complex with a Tunable Phenol Ligand, *Journal of the American Chemical Society*, 2015, **137**, 11105-11114.
10. S. Pompei, C. Grimm, J. E. Farnberger, L. Schober and W. Kroutil, Regioselectivity of Cobalamin - Dependent Methyltransferase Can Be Tuned by Reaction Conditions and Substrate, *ChemCatChem*, 2020, **12**, 5977-5983.
11. K. Sun, Z. Xu, V. Ramadoss, L. Tian and Y. Wang, Electrochemical deoxygenative reduction of ketones, *Chem. Commun.*, 2022, **58**, 11155-11158.
12. S. G. Newman, L. Gu, C. Lesniak, G. Victor, F. Meschke, L. Abahmane and K. F. Jensen, Rapid Wolff-Kishner reductions in a silicon carbide microreactor, *Green Chem.*, 2014, **16**, 176-180.
13. R. J. Andrews, S. S. Chitnis and D. W. Stephan, Carbonyl and olefin hydrosilylation mediated by an air-stable phosphorus(iii) dication under mild conditions, *Chem. Commun.*, 2019, **55**, 5599-5602.
14. B. Inés, R. SanMartin, M. J. Moure and E. Domínguez, Insights into the Role of New Palladium Pincer Complexes as Robust and Recyclable Precatalysts for Suzuki-Miyaura Couplings in Neat Water, *Adv. Synth. Catal.*, 2009, **351**, 2124-2132.
15. X. Yu and X. Lu, Efficient Synthesis of 9 - Tosylaminofluorene Derivatives by Boron

- Trifluoride Etherate - Catalyzed Aza - Friedel - Crafts Reaction of in situ Generated N - Tosylbenzaldimines, *Adv. Synth. Catal.*, 2011, **353**, 569-574.
16. M. Seki, S. R. Tapkir, M. R. Nadiveedhi, S. K. Mulani and K. Mashima, New Synthesis of Diarylmethanes, Key Building Blocks for SGLT2 Inhibitors, *ACS Omega*, 2023, **8**, 17288-17295.
  17. M. M. Zhao, H. Zhang, S. Iimura, M. S. Bednarz, Q.-L. Song, N.-K. Lim, J. Yan, W. Wu, K. Dai, X. Gu and Y. Wang, Process Development of Sotagliflozin, a Dual Inhibitor of Sodium–Glucose Cotransporter-1/2 for the Treatment of Diabetes, *Organic Process Research & Development*, 2020, **24**, 2689-2701.
  18. X.-j. Wang, L. Zhang, D. Byrne, L. Nummy, D. Weber, D. Krishnamurthy, N. Yee and C. H. Senanayake, Efficient Synthesis of Empagliflozin, an Inhibitor of SGLT-2, Utilizing an AlCl<sub>3</sub>-Promoted Silane Reduction of a  $\beta$ -Glycopyranoside, *Org. Lett.*, 2014, **16**, 4090-4093.
  19. M. Imamura, K. Nakanishi, T. Suzuki, K. Ikegai, R. Shiraki, T. Ogiyama, T. Murakami, E. Kurosaki, A. Noda, Y. Kobayashi, M. Yokota, T. Koide, K. Kosakai, Y. Ohkura, M. Takeuchi, H. Tomiyama and M. Ohta, Discovery of Ipragliflozin (ASP1941): A novel C-glucoside with benzothiophene structure as a potent and selective sodium glucose co-transporter 2 (SGLT2) inhibitor for the treatment of type 2 diabetes mellitus, *Biorg. Med. Chem.*, 2012, **20**, 3263-3279.
  20. Y. Zhang, J. Hou, H. Yang, S. Wang and K. Yuan, Electrochemically enhanced deoxygenative cross-coupling of aryl ketones with heteroarenes throughin situgenerated benzyl carbocations, *Org. Biomol. Chem.*, 2023, **21**, 80-84.
  21. J. Garfinkle, C. Ezzili, T. J. Rayl, D. G. Hochstatter, I. Hwang and D. L. Boger, Optimization of the Central Heterocycle of  $\alpha$ -Ketoheterocycle Inhibitors of Fatty Acid Amide Hydrolase, *J. Med. Chem.*, 2008, **51**, 4392-4403.
